# Supplementary material for: An expedient synthesis of functionalized 1,4-diketone-derived compounds via silyloxyallyl cation intermediates
Source: Royal Society of Chemistry journal article supplement (doi:10.1039/c5cc09763k), 2015-12-15

# **An Expedient Synthesis of Functionalized 1,4-Diketone-Derived Compounds via Silyloxyallyl Cation Intermediates**

Jacob R. Stepherson, Frank R. Fronczek, and Rendy Kartika\*

Department of Chemistry

232 Choppin Hall

Louisiana State University

Baton Rouge, LA 70803

email: rkartika@lsu.edu

## **SUPPORTING INFORMATION**

|                                                                        |      |
|------------------------------------------------------------------------|------|
| 1. General Information .....                                           | S2   |
| 2. Experimental Procedures and Characterization of New Compounds ..... | S-3  |
| 3. X-Ray Crystal Data .....                                            | S-29 |
| 3. <sup>1</sup> H and <sup>13</sup> C NMR Spectra .....                | S-39 |

## GENERAL INFORMATION

Unless otherwise noted, all materials were used as received from commercial suppliers without further purification. All anhydrous reactions were performed using oven-dried or flame-dried glassware, which was then cooled under vacuum and purged with nitrogen gas. Tetrahydrofuran (THF), dichloromethane ( $\text{CH}_2\text{Cl}_2$ ), acetonitrile, toluene, and diethyl ether ( $\text{Et}_2\text{O}$ ) were filtered through activated 3Å molecular sieves under nitrogen contained in an M-Braun Solvent Purification System. All reactions were monitored by EMD analytical thin layer chromatography (TLC Silica Gel 60 F<sub>254</sub>, Glass Plates) and analyzed with 254 nm UV light and / or anisaldehyde – sulfuric acid or potassium permanganate treatment. Silica gel for column chromatography was purchased from Dynamic Adsorbents, Inc. or Sigma Aldrich (Flash Silica Gel 32-63u).

Unless otherwise noted, all  $^1\text{H}$  and  $^{13}\text{C}$  NMR spectra were recorded in  $\text{CDCl}_3$  using a Bruker Ascend 400 spectrometer operating at 400 MHz for  $^1\text{H}$  and 100 MHz for  $^{13}\text{C}$  or Bruker Ascend 500 spectrometer operating at 500 MHz for  $^1\text{H}$  and 125 MHz for  $^{13}\text{C}$ . Chemical shifts ( $\delta$ ) are reported in ppm relative to residual  $\text{CHCl}_3$  as an internal reference ( $^1\text{H}$ : 7.26 ppm,  $^{13}\text{C}$ : 77.23 ppm). Coupling constants (J) are reported in Hertz (Hz). Peak multiplicity is indicated as follows: s (singlet), d (doublet), t (triplet), q (quartet), p (pentet), x (septet), h (heptet), b (broad), and m (multiplet). FT-IR spectra were recorded on Bruker Tensor 27 spectrometer and OPUS 6.5 Data Collection Program, and absorption frequencies were reported in reciprocal centimeters ( $\text{cm}^{-1}$ ). High Resolution Mass Spectrometry – Electron Spray Ionization (HRMS-ESI) analyses were performed by the Louisiana State University Mass Spectrometry Facility using an Agilent

6210 Instrument. X-ray structure analyses were performed by the Louisiana State University X-ray Structure Facility using a Bruker APEX-II CCD diffractometer.

## EXPERIMENTAL PROCEDURES AND CHARACTERIZATION OF NEW COMPOUNDS

### 2-(2-((tert-butyldimethylsilyl)oxy)-3-methylcyclopent-2-en-1-yl)-1-phenylethan-1-one (7a)

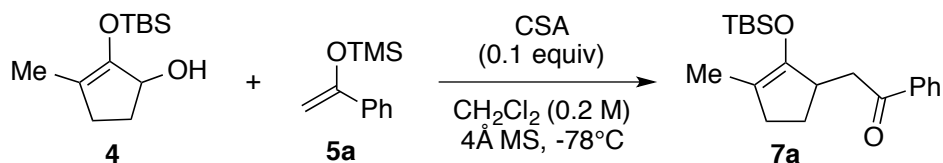

Starting material **4** (200 mg, 0.876 mmol) was dissolved in dry CH<sub>2</sub>Cl<sub>2</sub> (4.4 mL), and 4Å molecular sieves (1.0 g) were added. After cooling the reaction mixture to -78°C, silylenol ether **5a** (359 mL, 1.75 mmol) was added, followed by camphorsulfonic acid (20 mg, 0.088 mmol). The solution was stirred at -78°C for 7 hours until the completion of reaction, as monitored by TLC. The reaction was quenched with triethylamine (0.1 mL) and was directly purified by flash column chromatography with 50:50 hexanes : CH<sub>2</sub>Cl<sub>2</sub> to afford product **7a** (242 mg, 83%) as colorless oil.

<sup>1</sup>H NMR (500 MHz):  $\delta$  = 7.97 (dd,  $J$  = 8.4, 1.4 Hz, 2H), 7.65 – 7.48 (m, 1H), 7.44 (t,  $J$  = 7.7 Hz, 2H), 3.29 (dd,  $J$  = 16.9, 2.8 Hz, 1H), 3.10 (tdd,  $J$  = 8.3, 4.4, 2.4 Hz, 1H), 2.90 (dd,  $J$  = 16.9, 10.7 Hz, 1H), 2.28 – 2.11 (m, 3H), 1.58 (s, 3H), 1.51 – 1.40 (m, 1H), 0.96 (s, 9H), 0.14 (s, 3H), 0.11 (s, 3H). <sup>13</sup>C NMR (125 MHz):  $\delta$  = 199.81, 147.92, 137.23, 132.79, 128.43, 127.98, 113.74, 42.26, 41.33, 31.89, 26.94, 25.68, 18.03, 12.34, -4.10, -4.29. FT-IR:  $\nu$  (cm<sup>-1</sup>) = 2929, 2857, 1685, 1251, 1210, 907, 854, 836, 778, 752, 729, 688, 648. HR-MS: (M+H)<sup>+</sup> = 331.2088 calculated for C<sub>20</sub>H<sub>31</sub>O<sub>2</sub>Si; experimental = 331.2090.

**2-(2-((tert-butyldimethylsilyl)oxy)-3-methylcyclopent-2-en-1-yl)-1-(4-nitrophenyl)ethan-1-one (7b)**

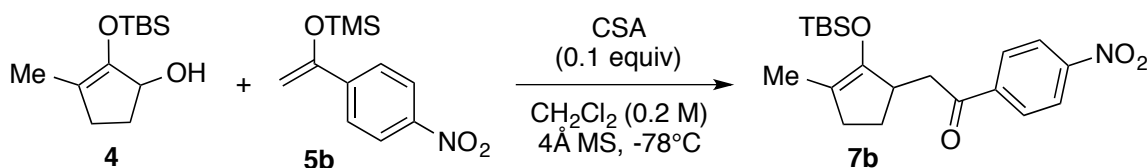

Starting material **4** (100 mg, 0.438 mmol) was dissolved in dry CH<sub>2</sub>Cl<sub>2</sub> (2.2 mL), and 4Å molecular sieves (500 mg) were added. After cooling the reaction mixture to -78°C, silylenol ether **5b** (208 mg, 0.876 mmol) was added, followed by camphorsulfonic acid (10 mg, 0.044 mmol). The solution was stirred at -78°C for 21 hours until the completion of reaction, as monitored by TLC. The reaction was quenched with triethylamine (0.1 mL) and was directly purified by flash column chromatography with 50:50 hexanes : CH<sub>2</sub>Cl<sub>2</sub> to afford product **7b** (97 mg, 59%) as colorless oil.

<sup>1</sup>H NMR (500 MHz): δ = 8.30 (d, *J* = 8.8 Hz, 2H), 8.10 (d, *J* = 8.8 Hz, 2H), 3.30 (dd, *J* = 16.9, 3.0 Hz, 1H), 3.07 (m, 1H), 2.93 (dd, *J* = 16.8, 10.2 Hz, 1H), 2.24 – 2.09 (m, 3H), 1.55 (s, 3H), 1.50 – 1.38 (m, 1H), 0.94 (s, 9H), 0.13 (s, 3H), 0.10 (s, 3H). <sup>13</sup>C NMR (125 MHz): δ = 198.57, 150.24, 147.43, 141.62, 129.06, 123.78, 114.34, 42.96, 41.52, 31.95, 26.86, 25.71, 18.08, 12.38, -4.05, -4.22. FT-IR: *f* (cm<sup>-1</sup>) = 2954, 2929, 2856, 1687, 1603, 1526, 1471, 1443, 1344, 1329, 1252, 1209, 1086, 1009, 938, 894, 836, 778, 746, 732, 685. HR-MS: (M+H)<sup>+</sup> = 376.1939 calculated for C<sub>20</sub>H<sub>30</sub>NO<sub>4</sub>Si; experimental = 376.1942.

**2-(2-((tert-butyldimethylsilyl)oxy)-3-methylcyclopent-2-en-1-yl)-1-(4-methoxyphenyl)ethan-1-one (7c)**

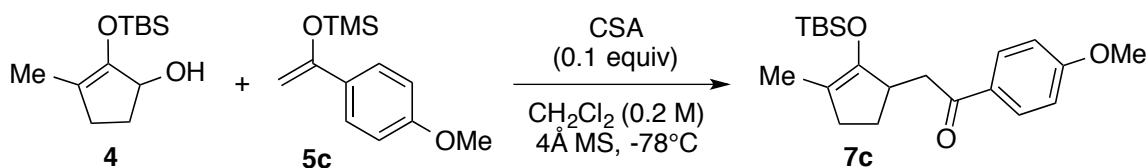

Starting material **4** (100 mg, 0.438 mmol) was dissolved in dry  $\text{CH}_2\text{Cl}_2$  (2.2 mL), and 4Å molecular sieves (500 mg) were added. After cooling the reaction mixture to  $-78^\circ\text{C}$ , silylenol ether **5c** (195 mg, 0.876 mmol) was added, followed by camphorsulfonic acid (10 mg, 0.044 mmol). The solution was stirred at  $-78^\circ\text{C}$  for 21 hours until the completion of reaction, as monitored by TLC. The reaction was quenched with triethylamine (0.1 mL) and was directly purified by flash column chromatography with 50:50 hexanes :  $\text{CH}_2\text{Cl}_2$  to afford product **7c** (93 mg, 59%) as colorless oil.

$^1\text{H}$  NMR (500 MHz):  $\delta$  = 7.95 (d,  $J$  = 8.9 Hz, 2H), 6.92 (d,  $J$  = 8.9 Hz, 2H), 3.86 (s, 3H), 3.22 (dd,  $J$  = 16.7, 2.8 Hz, 1H), 3.13 – 3.03 (m, 1H), 2.85 (dd,  $J$  = 16.7, 10.8 Hz, 1H), 2.22 – 2.08 (m, 3H), 1.57 (s, 3H), 1.44 (ddd,  $J$  = 13.4, 7.4, 4.5 Hz, 1H), 0.95 (s, 9H), 0.13 (s, 3H), 0.11 (s, 3H).  $^{13}\text{C}$  NMR (125 MHz):  $\delta$  = 198.48, 163.29, 148.08, 130.45, 130.25, 113.74, 113.59, 55.38, 41.89, 41.46, 31.91, 26.95, 25.71, 18.07, 12.36, -4.08, -4.26. FT-IR:  $f(\text{cm}^{-1})$  = 2954, 2929, 2855, 1677, 1599, 1575, 1509, 1442, 1328, 1280, 1252, 1211, 1167, 1073, 988, 938, 892, 855, 834, 777, 672. HR-MS:  $(\text{M}+\text{H})^+ = 361.2193$  calculated for  $\text{C}_{21}\text{H}_{33}\text{O}_3\text{Si}$ ; experimental = 361.2206.

**1-(2-((tert-butyldimethylsilyl)oxy)-3-methylcyclopent-2-en-1-yl)-3,3-dimethylbutan-2-one**  
**(7d)**

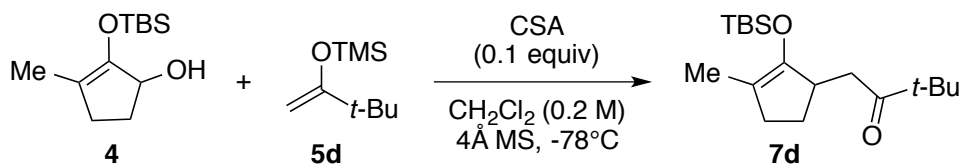

Starting material **4** (50 mg, 0.219 mmol) was dissolved in dry  $\text{CH}_2\text{Cl}_2$  (1.1 mL), and 4Å molecular sieves (250 mg) were added. After cooling the reaction mixture to  $-78^\circ\text{C}$ , silylenol ether **5d** (95  $\mu\text{L}$ , 0.438 mmol) was added, followed by camphorsulfonic acid (5.1 mg, 0.022 mmol). The solution was stirred at  $-78^\circ\text{C}$  for 36 hours until the completion of reaction, as monitored by TLC. The reaction was quenched with triethylamine (0.1 mL) and was directly purified by flash column chromatography with 50:50 hexanes :  $\text{CH}_2\text{Cl}_2$  to afford product **7d** (60 mg, 89%) as colorless oil.

$^1\text{H}$  NMR (500 MHz):  $\delta$  = 2.97 – 2.88 (m, 1H), 2.79 (dd,  $J$  = 18.0, 2.5 Hz, 1H), 2.45 (dd,  $J$  = 17.9, 11.0 Hz, 1H), 2.18 – 2.08 (m, 3H), 1.55 (s, 3H), 1.32 – 1.22 (m, 1H), 1.13 (s, 9H), 0.94 (s, 9H), 0.11 (s, 3H), 0.09 (s, 3H).  $^{13}\text{C}$  NMR (125 MHz):  $\delta$  = 215.65, 148.11, 113.58, 44.10, 40.68, 40.45, 31.90, 27.35, 26.40, 25.72, 18.09, 12.33, -4.13, -4.26. FT-IR:  $\nu$  ( $\text{cm}^{-1}$ ) = 2959, 2930, 2858, 1707, 1689, 1473, 1380, 1362, 1328, 1258, 1211, 1081, 1012, 938, 858, 837, 796, 672. HR-MS:  $(\text{M}+\text{H})^+ = 311.2401$  calculated for  $\text{C}_{18}\text{H}_{35}\text{O}_2\text{Si}$ ; experimental = 311.2403.

**2-(2-((tert-butyldimethylsilyl)oxy)-3-methylcyclopent-2-en-1-yl)cyclohexan-1-one (7e)**

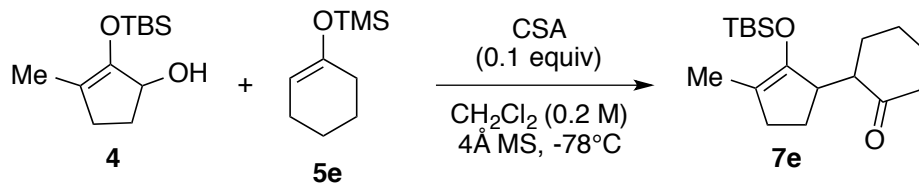

Starting material **4** (100 mg, 0.438 mmol) was dissolved in dry  $\text{CH}_2\text{Cl}_2$  (2.2 mL), and 4Å molecular sieves (500 mg) were added. After cooling the reaction mixture to  $-78^\circ\text{C}$ , silylenol ether **5e** (170  $\mu\text{L}$ , 0.876 mmol) was added, followed by camphorsulfonic acid (10 mg, 0.044 mmol). The solution was stirred at  $-78^\circ\text{C}$  for 23 hours until the completion of reaction, as monitored by TLC. The reaction was quenched with triethylamine (0.1 mL) and was directly purified by flash column chromatography with 50:50 hexanes :  $\text{CH}_2\text{Cl}_2$  to afford product **7e** as an inseparable 1:1 mixture of diastereomer (59 mg, 44%) as colorless oil.

$^1\text{H}$  NMR (500 MHz):  $\delta$  = 3.15 – 3.06 (m, 1H), 2.70 (ddt,  $J$  = 7.6, 4.0, 1.9 Hz, 1H), 2.57 (dddd,  $J$  = 13.0, 5.6, 2.8, 1.3 Hz, 1H), 2.43 – 2.32 (m, 4H), 2.31 – 2.20 (m, 4H), 2.09 – 1.91 (m, 8H), 1.68 – 1.58 (m, 5H), 1.52 (s, 6H), 1.47 – 1.36 (m, 4H), 0.92 (s, 18H), 0.09 (s, 6H), 0.08 (s, 3H), 0.05 (s, 3H).  $^{13}\text{C}$  NMR (125 MHz, \* denotes the other diastereomer):  $\delta$  = 212.97\*, 212.79, 148.50, 146.18\*, 114.83\*, 114.18, 55.02\*, 51.71, 44.54\*, 43.69, 42.54\*, 42.30, 32.97, 32.24\*, 31.86, 28.07\*, 27.19, 26.95\*, 26.37\*, 25.78\*, 25.72, 25.20, 25.10\*, 22.64, 18.08\*, 18.02, 12.61\*, 12.23, -3.89, -4.14, -4.19\*, -4.23\*. FT-IR:  $\nu(\text{cm}^{-1})$  = 2929, 2856, 1709, 1688, 1462, 1447, 1380, 1360, 1326, 1250, 1209, 1127, 1081, 1007, 939, 857, 835, 777, 675. HR-MS:  $(\text{M}+\text{Na})^+ = 331.2064$  calculated for  $\text{C}_{18}\text{H}_{32}\text{NaO}_2\text{Si}$ ; experimental = 331.2066.

**2-((tert-butyldimethylsilyl)oxy)-3-methylcyclopent-2-en-1-yl)-3,4-dihydronaphthalen-1(2H)-one (7f)**

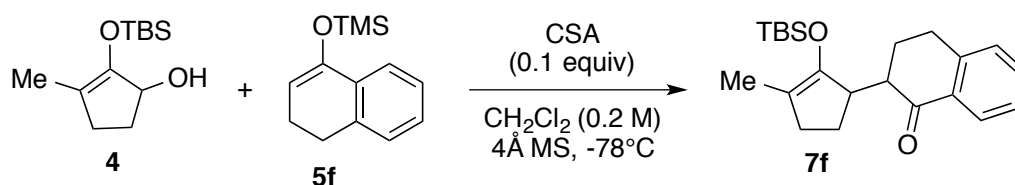

Starting material **4** (50 mg, 0.219 mmol) was dissolved in dry  $\text{CH}_2\text{Cl}_2$  (1.1 mL), and 4Å molecular sieves (250 mg) were added. After cooling the reaction mixture to  $-78^\circ\text{C}$ , silylenol ether **5f** (96 mg, 0.438 mmol) was added, followed by camphorsulfonic acid (5.1 mg, 0.022 mmol). The solution was stirred at  $-78^\circ\text{C}$  for 5 hours until the completion of reaction, as monitored by TLC. The reaction was quenched with triethylamine (0.1 mL) and was directly purified by flash column chromatography with 50:50 hexanes :  $\text{CH}_2\text{Cl}_2$  to afford product **7f** as an inseparable 2.5:1 mixture of diastereomer (59 mg, 75%) as colorless oil.

$^1\text{H}$  NMR (500 MHz):  $\delta$  = 8.04 (d,  $J$  = 7.8 Hz, 0.4H), 7.99 (d,  $J$  = 7.8 Hz, 1H), 7.49 – 7.38 (m, 1.4H), 7.33 – 7.23 (m, 2H), 7.20 (d,  $J$  = 7.5 Hz, 1H), 3.57 – 3.53 (m, 0.4H), 3.28 – 3.22 (m, 1H), 3.07 – 2.89 (m, 3H), 2.79 (ddd,  $J$  = 13.6, 4.3, 3.1 Hz, 0.4H), 2.49 (dt,  $J$  = 11.7, 4.6 Hz, 1H), 2.30 – 2.24 (m, 1H), 2.21 – 1.92 (m, 6H), 1.83 (tdd,  $J$  = 13.3, 11.7, 5.5 Hz, 0.4H), 1.66 – 1.61 (m, 1.2H), 1.58 (s, 3H), 1.54 (s, 3H), 0.94 (s, 3.6H), 0.82 (s, 9H), 0.15 (s, 1.2H), 0.12 (s, 4.2H), 0.07 (s, 3H).  $^{13}\text{C}$  NMR (125 MHz, \* denotes the minor diastereomer):  $\delta$  = 200.03\*, 199.01, 147.61, 146.36\*, 144.51\*, 144.15, 133.15\*, 133.11, 133.06\*, 132.73, 128.69\*, 128.38, 127.56\*, 127.24, 126.44\*, 126.32, 114.89, 114.59\*, 51.73, 49.72\*, 45.34, 44.37\*, 32.81\*, 32.67, 29.67\*, 29.09, 26.24\*, 25.76, 25.56, 22.99\*, 22.35\*, 18.14\*, 17.99, 12.73, 12.31\*, -3.94\*, -4.08. FT-IR:  $\tilde{\nu}(\text{cm}^{-1})$  = 2929, 2856, 1684, 1599, 1471, 1455, 1380, 1360, 1280, 1251, 1217, 1082, 1007, 922, 858,



838, 780, 744, 676. HR-MS:  $(M+H)^+ = 357.2244$  calculated for  $C_{22}H_{33}O_2Si$ ; experimental = 357.2245.

**(E)-4-(2-((tert-butyldimethylsilyl)oxy)-3-methylcyclopent-2-en-1-yl)-1-phenylbut-2-en-1-one (7g)**

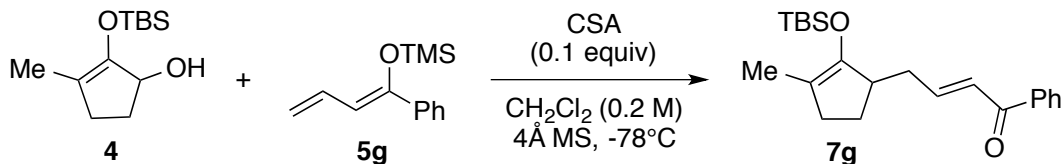

Starting material **4** (50 mg, 0.219 mmol) was dissolved in dry  $CH_2Cl_2$  (1.1 mL), and 4 Å molecular sieves (250 mg) were added. After cooling the reaction mixture to  $-78^\circ C$ , silylenol ether **5g** (96 mg, 0.438 mmol) was added, followed by camphorsulfonic acid (5.1 mg, 0.022 mmol). The solution was stirred at  $-78^\circ C$  for 20 hours until the completion of reaction, as monitored by TLC. The reaction was quenched with triethylamine (0.1 mL) and was directly purified by flash column chromatography with 50:50 hexanes :  $CH_2Cl_2$  to afford product **7g** (39 mg, 50%) as colorless oil.

$^1H$  NMR (500 MHz):  $\delta = 7.92$  (d,  $J = 7.1$  Hz, 2H), 7.55 (t,  $J = 7.4$  Hz, 1H), 7.46 (t,  $J = 7.6$  Hz, 2H), 7.03 (dt,  $J = 14.3, 7.1$  Hz, 1H), 6.88 (d,  $J = 15.4$  Hz, 1H), 2.70 – 2.61 (m, 2H), 2.28 – 2.10 (m, 3H), 2.05 – 1.95 (m, 1H), 1.56 (s, 3H), 1.56 – 1.49 (m, 1H), 0.96 (s, 9H), 0.13 (s, 3H), 0.13 (s, 3H).  $^{13}C$  NMR (125 MHz):  $\delta = 190.86, 148.59, 147.87, 138.02, 132.52, 128.53, 128.45, 127.06, 113.73, 44.64, 36.77, 31.96, 25.74, 25.71, 18.12, 12.33, -4.00, -4.17$ . FT-IR:  $\nu (cm^{-1}) = 2953, 2928, 2855, 1685, 1671, 1620, 1598, 1579, 1471, 1462, 1446, 1380, 1336, 1283, 1184, 1085, 1009, 983, 938, 891, 859, 836, 777, 733, 691$ . HR-MS:  $(M+H)^+ = 357.2244$  calculated for  $C_{22}H_{33}O_2Si$ ; experimental = 357.2252.

## 2-((tert-butyldimethylsilyl)oxy)-3-methylcyclohex-2-en-1-ol (**8**)

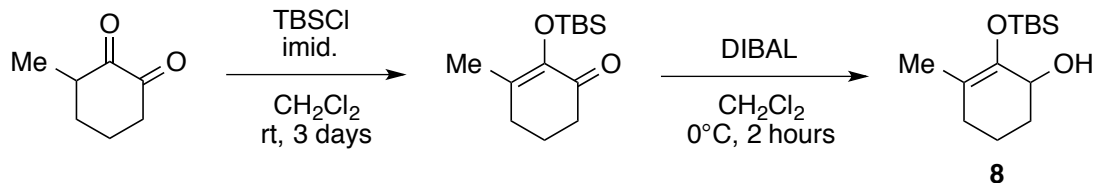

3-Methylcyclohexane-1,2-dione (3.00 g, 23.8 mmol) was dissolved in CH<sub>2</sub>Cl<sub>2</sub> (60 mL). TBSCl (4.12 g, 27.3 mmol) was then added, followed by imidazole (2.43 g, 35.7 mmol). Upon stirring at room temperature for 3 days, the reaction was quenched with aqueous HCl (2 M solution, 20 mL) and extracted with CH<sub>2</sub>Cl<sub>2</sub> (3 x 30 mL). The combined organic layers were dried over Na<sub>2</sub>SO<sub>4</sub> and then concentrated under vacuum to yield crude product (6.25 g). This material was then dissolved in CH<sub>2</sub>Cl<sub>2</sub> (65 mL) and cooled to 0°C. DIBAL (36.4 mL, 1.0 M solution in toluene) was added dropwise. Once the reaction was complete within 2 hours, as monitored by TLC, aqueous HCl (2 M solution, 100 mL) was added slowly. The resulting solid precipitate was filtered through pad of celite, and then the aqueous layer was then extracted with CH<sub>2</sub>Cl<sub>2</sub> (3 x 30 mL). The combined CH<sub>2</sub>Cl<sub>2</sub> layers were washed with brine, dried over Na<sub>2</sub>SO<sub>4</sub> and concentrated in *vacuo* to obtain crude product. The crude material was purified with flash column chromatography with 90 : 10 hexanes : ethyl acetate → 80 : 20 hexanes : ethyl acetate → 70 : 30 hexanes : ethyl acetate to yield compound **8** in 68% yield (3.93 g, 16.2 mmol) over two steps as a clear, colorless oil.

<sup>1</sup>H NMR (500 MHz): δ = 4.04 (s, 1H), 1.98 (dd, *J* = 15.0, 4.8 Hz, 3H), 1.89 – 1.77 (m, 1H), 1.80 – 1.63 (m, 2H), 1.60 (s, 3H), 1.58 – 1.46 (m, 1H), 0.97 (s, 9H), 0.16 (s, 3H), 0.15 (s, 3H). <sup>13</sup>C NMR (125 MHz): δ = 144.01, 115.74, 67.81, 32.07, 30.72, 25.88, 18.43, 16.66, -3.96, -4.06. FT-IR: *f* (cm<sup>-1</sup>) = 3424, 2929, 2857, 1678, 1472, 1462, 1441, 1389, 1360, 1252, 1192,

1119, 1075, 1007, 961, 922, 864, 828, 776, 707, 671. HR-MS:  $(M+Na)^+ = 265.1594$  calculated for  $C_{13}H_{26}NaO_2Si$ ; experimental = 265.1592.

**2-(2-((tert-butyldimethylsilyl)oxy)-3-methylcyclohex-2-en-1-yl)-1-phenylethan-1-one (9a)**

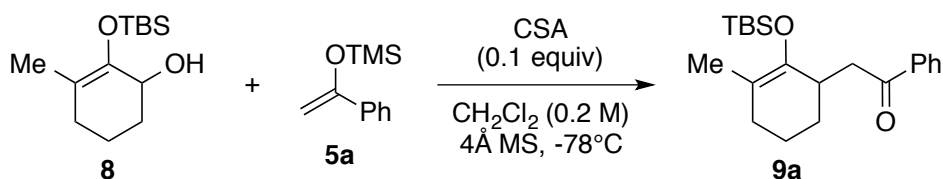

Starting material **8** (100 mg, 0.412 mmol) was dissolved in dry  $CH_2Cl_2$  (2.0 mL), and 4Å molecular sieves (500 mg) were added. After cooling the reaction mixture to  $-78^\circ C$ , silylenol ether **5a** (169  $\mu L$ , 0.824 mmol) was added, followed by camphorsulfonic acid (9.6 mg, 0.041 mmol). The solution was stirred at  $-78^\circ C$  for 42 hours until the completion of reaction, as monitored by TLC. The reaction was quenched with triethylamine (0.1 mL) and was directly purified by flash column chromatography with 50:50 hexanes :  $CH_2Cl_2$  to afford product **9a** (87 mg, 61%) as colorless oil.

$^1H$  NMR (500 MHz):  $\delta = 7.98$  (d,  $J = 7.3$  Hz, 2H), 7.55 (t,  $J = 7.4$  Hz, 1H), 7.45 (t,  $J = 7.7$  Hz, 2H), 3.32 (dd,  $J = 17.6, 2.3$  Hz, 1H), 3.05 (dd,  $J = 17.5, 10.8$  Hz, 1H), 2.91 – 2.82 (m, 1H), 2.06 – 1.91 (m, 2H), 1.85 (dddd,  $J = 13.2, 9.7, 5.8, 3.3$  Hz, 1H), 1.62 (s, 3H), 1.8 – 1.48 (m, 2H), 1.47 – 1.40 (m, 1H), 0.94 (s, 9H), 0.12 (s, 3H), 0.10 (s, 3H).  $^{13}C$  NMR (125 MHz):  $\delta = 199.82, 144.60, 137.50, 132.87, 128.51, 127.96, 113.75, 41.14, 34.88, 30.67, 28.98, 25.92, 19.67, 18.27, 17.12, -3.73, -4.33$ . FT-IR:  $f(cm^{-1}) = 2928, 2857, 1683, 1597, 1471, 1461, 1448, 1359, 1254, 1217, 1199, 1165, 1124, 1002, 916, 858, 828, 814, 777, 750, 689, 673$ . HR-MS:  $(M+H)^+ = 345.2244$  calculated for  $C_{21}H_{33}O_2Si$ ; experimental = 345.2247.

**2-(2-((tert-butyldimethylsilyl)oxy)-3-methylcyclohex-2-en-1-yl)-1-(4-nitrophenyl)ethan-1-one (9b)**

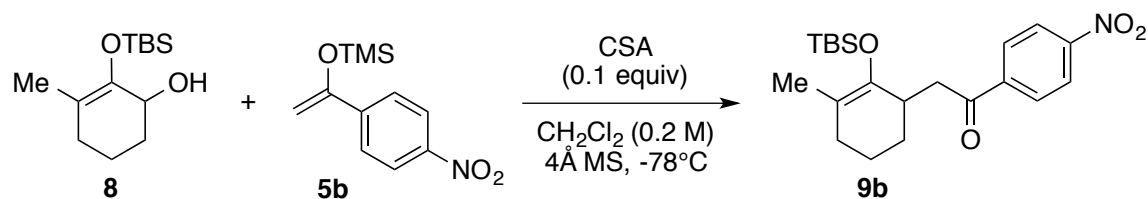

Starting material **8** (100 mg, 0.412 mmol) was dissolved in dry CH<sub>2</sub>Cl<sub>2</sub> (2.0 mL), and 4Å molecular sieves (500 mg) were added. After cooling the reaction mixture to -78°C, silylenol ether **5b** (196 mg, 0.824 mmol) was added, followed by camphorsulfonic acid (9.6 mg, 0.041 mmol). The solution was stirred at -78°C for 30 hours until the completion of reaction, as monitored by TLC. The reaction was quenched with triethylamine (0.1 mL) and was directly purified by flash column chromatography with 50:50 hexanes : CH<sub>2</sub>Cl<sub>2</sub> to afford product **9b** (64 mg, 40%) as colorless oil.

<sup>1</sup>H NMR (500 MHz): δ = 8.30 (d, *J* = 8.8 Hz, 2H), 8.11 (d, *J* = 8.9 Hz, 2H), 3.38 (dd, *J* = 17.7, 2.5 Hz, 1H), 3.05 (dd, *J* = 17.6, 10.4 Hz, 1H), 2.88 – 2.83 (m, 1H), 2.05 – 1.82 (m, 3H), 1.61 (s, 3H), 1.58 – 1.40 (m, 3H), 0.92 (s, 9H), 0.12 (s, 3H), 0.08 (s, 3H). <sup>13</sup>C NMR (125 MHz): δ = 198.39, 150.24, 143.99, 141.78, 128.97, 123.81, 114.26, 41.96, 35.00, 30.56, 29.04, 25.89, 19.67, 18.25, 17.13, -3.75, -4.32. FT-IR: *f*(cm<sup>-1</sup>) = 2928, 2857, 1692, 1603, 1525, 1471, 1461, 1405, 1344, 1317, 1254, 1195, 1163, 1124, 1096, 1103, 91, 867, 854, 825, 813, 776, 745, 686, 675. HR-MS: (M+H)<sup>+</sup> = 390.2095 calculated for C<sub>21</sub>H<sub>32</sub>NO<sub>4</sub>Si; experimental = 390.2105.

**1-(2-((tert-butyldimethylsilyl)oxy)-3-methylcyclohex-2-en-1-yl)-3,3-dimethylbutan-2-one**

**(9d)**

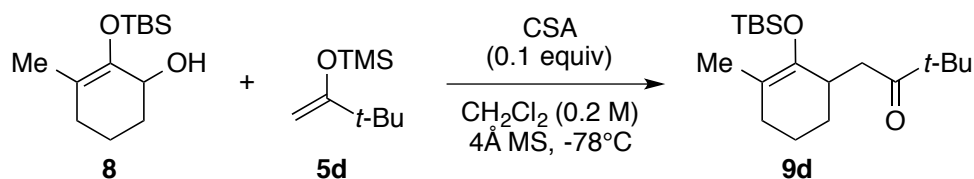

Starting material **8** (50 mg, 0.206 mmol) was dissolved in dry CH<sub>2</sub>Cl<sub>2</sub> (1.0 mL), and 4 Å molecular sieves (250 mg) were added. After cooling the reaction mixture to -78 °C, silylenol ether **5d** (89 µL, 0.412 mmol) was added, followed by camphorsulfonic acid (4.9 mg, 0.021 mmol). The solution was stirred at -78 °C for 48 hours until the completion of reaction, as monitored by TLC. The reaction was quenched with triethylamine (0.1 mL) and was directly purified by flash column chromatography with 50:50 hexanes : CH<sub>2</sub>Cl<sub>2</sub> to afford product **9d** (45 mg, 67%) as colorless oil.

<sup>1</sup>H NMR (500 MHz): δ = 2.79 (dd, *J* = 17.6, 1.8 Hz, 1H), 2.73 – 2.67 (m, 1H), 2.60 (dd, *J* = 17.6, 10.9 Hz, 1H), 1.94 (dtd, *J* = 22.4, 16.5, 6.3 Hz, 2H), 1.80 – 1.72 (m, 1H), 1.58 (s, 3H), 1.53 – 1.44 (m, 2H), 1.31 – 1.21 (m, 1H), 1.12 (s, 9H), 0.93 (s, 9H), 0.10 (s, 3H), 0.08 (s, 3H). <sup>13</sup>C NMR (125 MHz): δ = 215.30, 144.79, 113.49, 44.10, 39.36, 34.34, 30.67, 28.92, 26.34, 25.91, 19.71, 18.27, 17.06, 1.02, -3.86, -4.35. FT-IR: *f* (cm<sup>-1</sup>) = 2954, 2928, 2858, 1705, 1681, 1473, 1391, 1362, 1254, 1165, 1124, 1099, 1061, 1004, 916, 826, 813, 776, 672. HR-MS: (M+H)<sup>+</sup> = 325.2557 calculated for C<sub>19</sub>H<sub>37</sub>O<sub>2</sub>Si; experimental = 325.2558.

**2'-((tert-butyldimethylsilyl)oxy)-3'-methyl-[1,1'-bi(cyclohexan)]-2'-en-2-one (9e)**

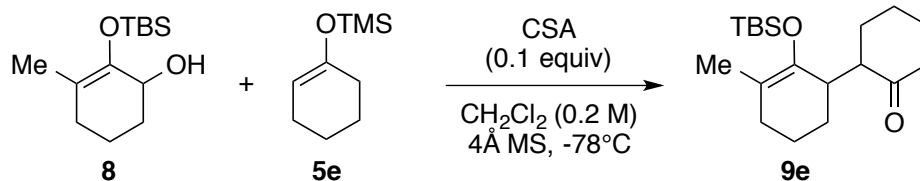

Starting material **8** (100 mg, 0.412 mmol) was dissolved in dry CH<sub>2</sub>Cl<sub>2</sub> (2.0 mL), and 4Å molecular sieves (500 mg) were added. After cooling the reaction mixture to -78°C, silylenol ether **5e** (160 µL, 0.824 mmol) was added, followed by camphorsulfonic acid (9.6 mg, 0.041 mmol). The solution was stirred at -78°C for 27 hours until the completion of reaction, as monitored by TLC. The reaction was quenched with triethylamine (0.1 mL) and was directly purified by flash column chromatography with 50:50 hexanes : CH<sub>2</sub>Cl<sub>2</sub> to afford product **9e** as an inseparable 3:2 mixture of diastereomers (60 mg, 45%) as colorless oil.

<sup>1</sup>H NMR (500 MHz): δ = 2.93 – 2.81 (m, 0.8H), 2.57 – 2.48 (m, 2.2H), 2.38 – 2.23 (m, 1.8H), 2.10 – 1.84 (m, 9.6H), 1.68 – 1.58 (m, 6H), 1.56 (s, 2H), 1.54 (s, 3H), 0.93 (s, 4H), 0.92 (s, 9H), 0.10 (s, 3H), 0.08 (s, 1.2H), 0.07 (s, 3H), 0.02 (s, 1.2H). <sup>13</sup>C NMR (125 MHz, \* denotes the minor diastereomer): δ = 212.54\*, 212.23, 144.36, 143.08\*, 114.89\*, 113.26, 54.02, 50.81\*, 42.89, 42.22\*, 37.60\*, 37.49, 32.85, 30.75\*, 30.33, 28.38, 27.82, 27.07\*, 26.84\*, 26.02, 25.94\*, 25.91, 25.42\*, 24.97\*, 22.00\*, 19.30, 18.28, 18.26, 17.31\*, 17.10, 2.73\*, -3.27, -4.04\*, -4.15, -4.39\*. FT-IR:  $\tilde{\nu}$  (cm<sup>-1</sup>) = 2928, 2857, 1709, 1678, 1448, 1360, 1252, 1160, 1129, 1050, 1007, 916, 832, 775, 733, 670. HR-MS: (M+H)<sup>+</sup> = 323.2401 calculated for C<sub>19</sub>H<sub>35</sub>O<sub>2</sub>Si; experimental = 323.2412.

**2-(2-((tert-butyldimethylsilyl)oxy)-3-methylcyclohex-2-en-1-yl)-3,4-dihydronaphthalen-1(2H)-one (9f)**

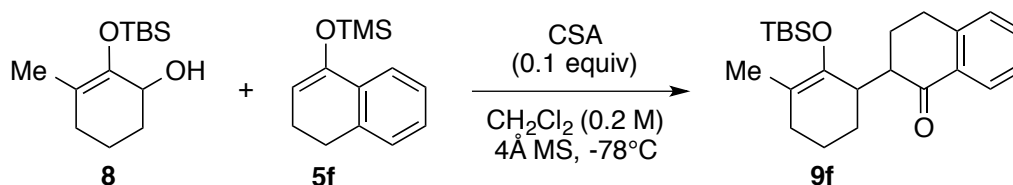

Starting material **8** (50 mg, 0.206 mmol) was dissolved in dry CH<sub>2</sub>Cl<sub>2</sub> (1.0 mL), and 4Å molecular sieves (250 mg) were added. After cooling the reaction mixture to -78°C, silylenol ether **5f** (90 mg, 0.412 mmol) was added, followed by camphorsulfonic acid (4.9 mg, 0.021 mmol). The solution was stirred at -78°C for 23 hours until the completion of reaction, as monitored by TLC. The reaction was quenched with triethylamine (0.1 mL) and was directly purified by flash column chromatography with 50:50 hexanes : CH<sub>2</sub>Cl<sub>2</sub> to afford product **9f** as an inseparable 2:1 mixture of diastereomers (48 mg, 63%) as colorless oil.

<sup>1</sup>H NMR (500 MHz): δ = 8.05 (d, *J* = 7.8 Hz, 0.5H), 8.00 (d, *J* = 7.2 Hz, 1H), 7.48 – 7.40 (m, 1.5H), 7.29 (dd, *J* = 14.3, 7.4 Hz, 1.5H), 7.22 (t, *J* = 8.7 Hz, 1.5H), 3.28 – 3.19 (m, 0.5H), 3.06 (ddd, *J* = 13.5, 4.5, 3.3 Hz, 0.5H), 3.02 – 2.94 (m, 3H), 2.89 – 2.85 (m, 1H), 2.64 – 2.54 (m, 1.5H), 2.17 – 1.95 (m, 6.5H), 1.91 – 1.80 (m, 3.5H), 1.61 (s, 1.5H), 1.59 (s, 3H), 1.57 – 1.45 (m, 5.5H), 1.33 – 1.18 (m, 3H), 0.94 (s, 4.5H), 0.84 (s, 9H), 0.12 (s, 1.5H), 0.09 (s, 4.5H), 0.06 (s, 3H). <sup>13</sup>C NMR (125 MHz, \* denotes the minor diastereomer): δ = 199.76, 199.09, 144.53\*, 144.19, 144.00, 143.16\*, 133.23\*, 132.99, 132.76, 128.65\*, 128.47, 127.51, 127.27\*, 126.43\*, 126.33, 115.29\*, 113.84, 51.2, 49.30\*, 38.92, 38.58\*, 30.87\*, 30.62, 29.09, 27.27\*, 26.02, 25.93\*, 24.81, 23.97\*, 22.04\*, 20.27, 18.24\*, 17.31, -3.33, -3.82\*, -4.01, -4.41\*. FT-IR: *f*(cm<sup>-1</sup>) = 2928, 2857, 1682, 1599, 1454, 1359, 1285, 1257, 1220, 1161, 1091, 1019, 920, 831, 797, 777,

744, 704, 669. HR-MS:  $(M+H)^+ = 393.2220$  calculated for  $C_{23}H_{34}NaO_2Si$ ; experimental = 393.2219.

**2-((*tert*-butyldimethylsilyl)oxy)-1-octylcyclopent-2-en-1-ol (**10b**)**

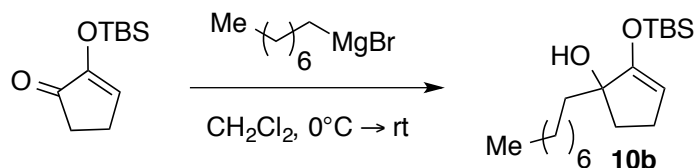

2-((*tert*-butyldimethylsilyl)oxy)cyclopent-2-en-1-one (150 mg, 0.708 mmol) was dissolved in  $CH_2Cl_2$  (3.5 mL). After cooling to  $0^\circ C$ , octyl magnesium bromide (0.70 mL, 2M in  $Et_2O$ , 1.42 mmol) was added drop wise. The reaction mixture was then stirred at room temperature for 1 hour until the completion of reaction, as monitored by TLC. After cooling to  $0^\circ C$ , the reaction mixture was then quenched with water (15 mL). The resulting solid precipitate was filtered through a pad of celite, and the aqueous layer was extracted with  $CH_2Cl_2$  (3 x 20 mL). The combined organic layers were then washed with brine, dried over  $Na_2SO_4$ , and concentrated under vacuum. The crude product was further purified by flash column chromatography (buffered with  $Et_3N$ ) with 95:5 hexanes :  $EtOAc$  to afford product **10b** (118 mg, 51% yield) as colorless oil.

$^1H$  NMR (500 MHz):  $\delta$  = 4.64 (t,  $J$  = 2.4 Hz, 1H), 2.25 (ddt,  $J$  = 14.7, 8.7, 3.0 Hz, 1H), 2.12 – 2.04 (m, 1H), 2.04 – 1.96 (m, 1H), 1.84 (ddd,  $J$  = 13.8, 9.0, 4.9 Hz, 1H), 1.77 (s, 1H), 1.67 – 1.55 (m, 1H), 1.54 – 1.45 (m, 1H), 1.26 (s, 14H), 0.93 (s, 9H), 0.87 (t,  $J$  = 6.9 Hz, 3H), 0.19 (s, 3H), 0.17 (s, 3H).  $^{13}C$  NMR (125 MHz):  $\delta$  = 155.87, 101.76, 82.51, 38.64, 34.27, 31.85, 30.12, 29.57, 29.24, 25.63, 24.55, 24.17, 22.64, 18.04, 14.07, -4.86, -5.03. FT-IR:  $f$  ( $cm^{-1}$ ) = 3448, 2927, 2856, 1648, 1464, 1361, 1252, 1006, 908, 857, 837, 780, 732, 677. HR-MS:  $(M-OH)^+ = 309.2608$  calculated for  $C_{19}H_{37}OSi$ ; experimental = 309.2615.



## 2-((*tert*-butyldimethylsilyl)oxy)-1-isobutylcyclopent-2-en-1-ol (**10c**)

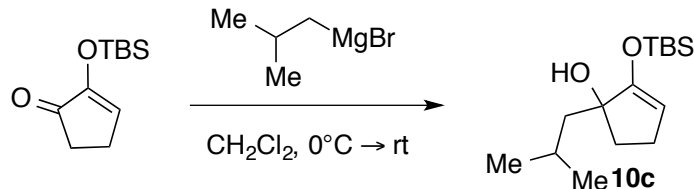

2-((*tert*-butyldimethylsilyl)oxy)cyclopent-2-en-1-one (150 mg, 0.708 mmol) was dissolved in  $\text{CH}_2\text{Cl}_2$  (3.5 mL). After cooling to  $0^\circ\text{C}$ , isobutyl magnesium bromide (0.70 mL, 2M in  $\text{Et}_2\text{O}$ , 1.42 mmol) was added dropwise. The reaction mixture was then stirred at room temperature for 1 hour until the completion of reaction, as monitored by TLC. After cooling to  $0^\circ\text{C}$ , the reaction mixture was then quenched with water (15 mL). The resulting solid precipitate was filtered through a pad of celite, and the aqueous layer was extracted with  $\text{CH}_2\text{Cl}_2$  (3 x 20 mL). The combined organic layers were then washed with brine, dried over  $\text{Na}_2\text{SO}_4$ , and concentrated under vacuum. The crude product was further purified by flash column chromatography (buffered with  $\text{Et}_3\text{N}$ ) with 95:5 hexanes :  $\text{EtOAc}$  to afford product **10c** (56 mg, 29 % yield) as colorless oil.

$^1\text{H}$  NMR (500 MHz):  $\delta$  = 4.63 (s, 1H), 2.27 (m, 1H), 2.17 – 2.02 (m, 2H), 1.88 (ddd,  $J$  = 13.5, 8.9, 3.8 Hz, 1H), 1.74 (dd,  $J$  = 12.9, 6.4 Hz, 1H), 1.69 (s, 1H), 1.59 (dd,  $J$  = 13.9, 5.6 Hz, 1H), 1.42 (dd,  $J$  = 13.9, 6.5 Hz, 1H), 1.02 – 0.84 (m, 15H), 0.19 (s, 3H), 0.17 (s, 3H).  $^{13}\text{C}$  NMR (125 MHz):  $\delta$  = 156.46, 101.56, 82.53, 46.95, 34.76, 25.66, 24.84, 24.63, 24.61, 24.08, 18.07, -4.92, -4.98. FT-IR:  $f(\text{cm}^{-1})$  = 3473, 2953, 2929, 2858, 1649, 1470, 1362, 1251, 1129, 1037, 1003, 837, 780, 732, 677. HR-MS:  $(\text{M-OH})^+ = 253.1982$  calculated for  $\text{C}_{15}\text{H}_{29}\text{OSi}$ ; experimental = 253.1975.

**2-((*tert*-butyldimethylsilyl)oxy)-1-(4-methoxyphenyl)cyclopent-2-en-1-ol (10e)**

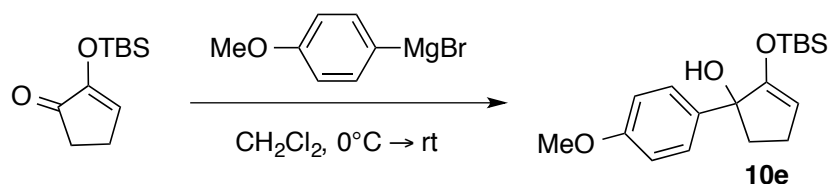

2-((*tert*-butyldimethylsilyl)oxy)cyclopent-2-en-1-one (200 mg, 0.943 mmol) was dissolved in  $\text{CH}_2\text{Cl}_2$  (4.7 mL). After cooling to  $0^\circ\text{C}$ , 4-methoxyphenyl magnesium bromide (3.8 mL, 0.5M in THF, 1.87 mmol) was added drop wise. The reaction mixture was then stirred at room temperature for 1 hour until the completion of reaction, as monitored by TLC. After cooling to  $0^\circ\text{C}$ , the reaction mixture was then quenched with water (15 mL). The resulting solid precipitate was filtered through a pad of celite, and the aqueous layer was extracted with  $\text{CH}_2\text{Cl}_2$  (3 x 20 mL). The combined organic layers were then washed with brine, dried over  $\text{Na}_2\text{SO}_4$ , and concentrated under vacuum. The crude product was further purified by flash column chromatography (buffered with  $\text{Et}_3\text{N}$ ) with 95:5 hexanes :  $\text{EtOAc}$  to afford product **10e** (113 mg, 37% yield) as colorless oil.

$^1\text{H}$  NMR (500 MHz):  $\delta$  = 7.34 (d,  $J$  = 8.8 Hz, 2H), 6.85 (d,  $J$  = 8.8 Hz, 2H), 4.87 (t,  $J$  = 2.2 Hz, 1H), 3.80 (s, 3H), 2.43 – 2.30 (m, 2H), 2.32 – 2.05 (m, 3H), 0.80 (s, 9H), 0.17 (s, 3H), 0.06 (s, 3H).  $^{13}\text{C}$  NMR (125 MHz):  $\delta$  = 158.41, 155.82, 137.96, 126.28, 113.31, 103.09, 83.76, 55.22, 39.65, 25.50, 24.72, 17.96, -4.81, -5.20. FT-IR:  $\nu(\text{cm}^{-1})$  = 3470, 2930, 2856, 1648, 1610, 1463, 1243, 1175, 1055, 1037, 1004, 912, 831, 779, 732, 677, 568. HR-MS:  $(\text{M}-\text{H}_2\text{O})^+ = 303.1775$  calculated for  $\text{C}_{18}\text{H}_{27}\text{O}_2\text{Si}$ ; experimental = 303.1776.

**1-(3,5-bis(trifluoromethyl)phenyl)-2-((tert-butyldimethylsilyl)oxycyclopent-2-en-1-ol (10f)**

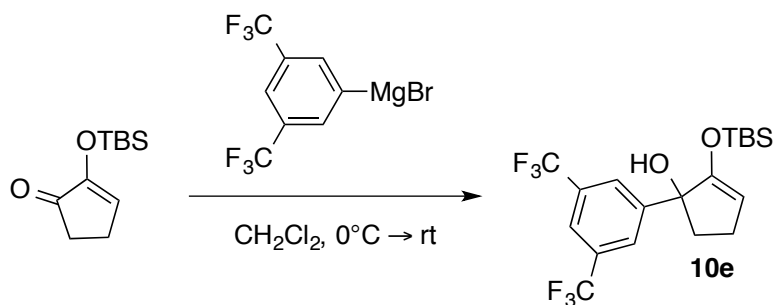

2-((*tert*-butyldimethylsilyl)oxy)cyclopent-2-en-1-one (200 mg, 0.943 mmol) was dissolved in CH<sub>2</sub>Cl<sub>2</sub> (4.7 mL). After cooling to 0°C, 3,5-bis-(trifluoromethyl)phenyl magnesium bromide (3.8 mL, 0.5M in THF, 1.87 mmol) was added drop wise. The reaction mixture was then stirred at room temperature for 1 hour until the completion of reaction, as monitored by TLC. After cooling to 0°C, the reaction mixture was then quenched with water (15 mL). The resulting solid precipitate was filtered through a pad of celite, and the aqueous layer was extracted with CH<sub>2</sub>Cl<sub>2</sub> (3 x 20 mL). The combined organic layers were then washed with brine, dried over Na<sub>2</sub>SO<sub>4</sub>, and concentrated under vacuum. The crude product was further purified by flash column chromatography (buffered with Et<sub>3</sub>N) with 95:5 hexanes : EtOAc to afford product **10f** (194 mg, 48 % yield) as colorless oil.

<sup>1</sup>H NMR (500 MHz): δ = 8.13 – 7.83 (m, 2H), 7.75 (s, 1H), 4.99 (t, *J* = 2.2 Hz, 1H), 2.60 – 2.40 (m, 2H), 2.34 (ddd, *J* = 11.4, 10.2, 5.1 Hz, 2H), 2.30 – 2.03 (m, 1H), 0.75 (s, 9H), 0.18 (s, 3H), 0.06 (s, 3H). <sup>13</sup>C NMR (125 MHz): δ = 154.48, 148.69, 131.35 (q, *J* = 33.1 Hz), 125.78 (d, *J* = 4.0 Hz), 123.50 (q, *J* = 272.7 Hz), 120.76 (p, *J* = 3.8 Hz), 104.59, 84.02, 39.55, 25.24, 24.90, 17.83, -4.87, -5.61. FT-IR: *f* (cm<sup>-1</sup>) = 3447, 2933, 2861, 1650, 1468, 1374, 1275, 1171, 1128, 1058, 897, 839, 781, 735, 707, 680. HR-MS: (M-H<sub>2</sub>O)<sup>+</sup> = 409.1417 calculated for C<sub>19</sub>H<sub>23</sub>F<sub>6</sub>OSi; experimental = 409.1407.

**2-(3-allyl-2-((tert-butyldimethylsilyl)oxy)cyclopent-2-en-1-yl)-1-phenylethan-1-one (12a)**

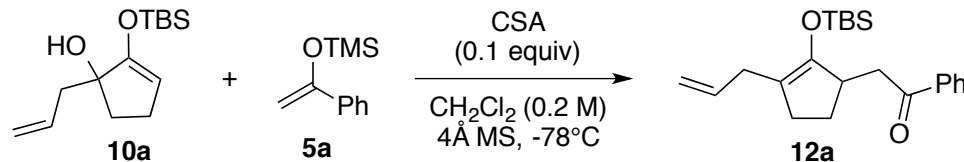

Starting material **10a** (50 mg, 0.197 mmol) was dissolved in dry CH<sub>2</sub>Cl<sub>2</sub> (1.0 mL), and 4Å molecular sieves (250 mg) were added. After cooling the reaction mixture to -78°C, silylenol ether **5a** (80 µL, 0.393 mmol) was added, followed by camphorsulfonic acid (4.6 mg, 0.020 mmol). The solution was stirred at -78°C for 47 hours until the completion of reaction, as monitored by TLC. The reaction was quenched with triethylamine (0.1 mL) and was directly purified by flash column chromatography with 50:50 hexanes : CH<sub>2</sub>Cl<sub>2</sub> to afford product **12a** (33 mg, 47%) as colorless oil.

<sup>1</sup>H NMR (500 MHz): δ = 7.97 (d, *J* = 7.0 Hz, 2H), 7.55 (t, *J* = 7.4 Hz, 1H), 7.46 (t, *J* = 7.7 Hz, 2H), 5.74 (ddt, *J* = 16.8, 10.0, 6.6 Hz, 1H), 5.06 – 4.96 (m, 2H), 3.27 (dd, *J* = 17.0, 2.8 Hz, 1H), 3.17 – 3.06 (m, 1H), 2.94 (dd, *J* = 16.9, 10.6 Hz, 1H), 2.80 (qd, *J* = 15.0, 6.6 Hz, 2H), 2.24 – 2.06 (m, 3H), 1.53 – 1.40 (m, 1H), 0.95 (s, 9H), 0.14 (s, 3H), 0.12 (s, 3H). <sup>13</sup>C NMR (125 MHz): δ = 199.87, 148.53, 137.26, 136.03, 128.51, 128.05, 115.82, 115.17, 42.16, 41.43, 31.30, 29.21, 26.91, 25.72, 18.09, -3.99, -4.32. FT-IR: *f*(cm<sup>-1</sup>) = 3076, 2954, 2929, 2893, 2856, 1682, 1638, 1597, 1462, 1360, 1335, 1287, 1250, 1210, 1046, 995, 895, 853, 836, 778, 751, 689, 575. HR-MS: (M+H)<sup>+</sup> = 357.2244 calculated for C<sub>22</sub>H<sub>32</sub>O<sub>2</sub>Si; experimental = 357.2230.

**2-(3-octyl-2-((tert-butyldimethylsilyl)oxy)cyclopent-2-en-1-yl)-1-phenylethan-1-one (12b)**

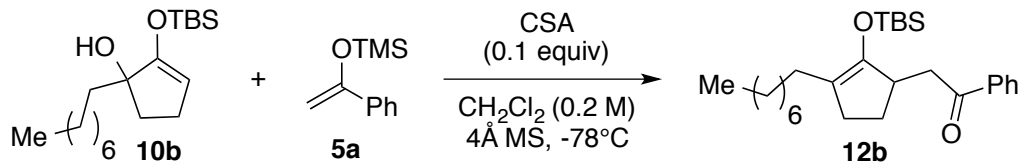

Starting material **10b** (50 mg, 0.153 mmol) was dissolved in dry  $\text{CH}_2\text{Cl}_2$  (0.80 mL), and 4Å molecular sieves (250 mg) were added. After cooling the reaction mixture to  $-78^\circ\text{C}$ , silylenol ether **5a** (63  $\mu\text{L}$ , 0.306 mmol) was added, followed by camphorsulfonic acid (3.5 mg, 0.015 mmol). The solution was stirred at  $-78^\circ\text{C}$  for 49 hours until the completion of reaction, as monitored by TLC. The reaction was quenched with triethylamine (0.1 mL) and was directly purified by flash column chromatography with 50:50 hexanes :  $\text{CH}_2\text{Cl}_2$  to afford product **12b** (45 mg, 68%) as colorless oil.

$^1\text{H}$  NMR (400 MHz):  $\delta$  = 7.97 (d,  $J$  = 7.6 Hz, 2H), 7.55 (t,  $J$  = 7.2 Hz, 1H), 7.45 (t,  $J$  = 7.5 Hz, 2H), 3.27 (dd,  $J$  = 16.8, 2.8 Hz, 1H), 3.14 – 3.03 (m, 1H), 2.90 (dd,  $J$  = 16.8, 10.6 Hz, 1H), 2.27 – 2.08 (m, 3H), 2.02 (q,  $J$  = 7.2 Hz, 2H), 1.46 (tt,  $J$  = 8.2, 4.2 Hz, 1H), 1.28 (bs, 14H), 0.95 (s, 9H), 0.89 (t,  $J$  = 5.2 Hz, 3H), 0.13 (s, 3H), 0.11 (s, 3H).  $^{13}\text{C}$  NMR (100 MHz):  $\delta$  = 200.04, 147.65, 137.37, 132.84, 128.48, 128.06, 118.42, 42.28, 41.55, 31.89, 29.76, 29.48, 29.30, 29.23, 27.68, 26.95, 26.63, 25.75, 22.67, 18.11, 14.09, -3.98, -4.34. FT-IR:  $\nu$  ( $\text{cm}^{-1}$ ) = 2954, 2927, 2855, 1680, 1589, 1580, 1462, 1448, 1252, 1209, 1180, 906, 856, 837, 779, 729, 688, 648, 582. HR-MS:  $(\text{M}+\text{H})^+ = 429.3183$  calculated for  $\text{C}_{27}\text{H}_{45}\text{O}_2\text{Si}$ ; experimental = 429.3190.

**2-(2-((tert-butyldimethylsilyl)oxy)-3-isobutylcyclopent-2-en-1-yl)-1-phenylethan-1-one (12c)**

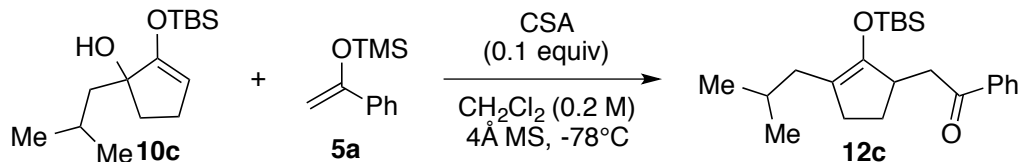

Starting material **10c** (56 mg, 0.207 mmol) was dissolved in dry  $\text{CH}_2\text{Cl}_2$  (1.0 mL), and 4Å molecular sieves (280 mg) were added. After cooling the reaction mixture to  $-78^\circ\text{C}$ , silylenol ether **5a** (85  $\mu\text{L}$ , 0.414 mmol) was added, followed by camphorsulfonic acid (4.8 mg, 0.021 mmol). The solution was stirred at  $-78^\circ\text{C}$  for 18 hours until the completion of reaction, as monitored by TLC. The reaction was quenched with triethylamine (0.1 mL) and was directly purified by flash column chromatography with 50:50 hexanes :  $\text{CH}_2\text{Cl}_2$  to afford product **12c** (45 mg, 59%) as colorless oil.

$^1\text{H}$  NMR (400 MHz):  $\delta$  = 7.98 (d,  $J$  = 8.0 Hz, 2H), 7.55 (t,  $J$  = 7.5 Hz, 1H), 7.46 (t,  $J$  = 7.6 Hz, 2H), 3.27 (dd,  $J$  = 16.9, 2.6 Hz, 1H), 3.15 – 3.01 (m, 1H), 2.90 (dd,  $J$  = 16.9, 10.6 Hz, 1H), 2.31 – 2.05 (m, 3H), 1.95 (dd,  $J$  = 13.6, 8.3 Hz, 1H), 1.89 – 1.79 (m, 1H), 1.71 (dp,  $J$  = 13.9, 6.7 Hz, 1H), 0.94 (s, 9H), 0.88 (d,  $J$  = 10.4 Hz, 3H), 0.86 (d,  $J$  = 10.2 Hz, 3H), 0.12 (s, 3H), 0.11 (s, 3H).  $^{13}\text{C}$  NMR (100 MHz):  $\delta$  = 200.07, 148.80, 137.29, 132.89, 128.50, 128.07, 117.45, 42.20, 41.48, 35.89, 29.60, 26.96, 26.70, 25.78, 23.05, 22.41, 18.10, -3.82, -4.28. FT-IR:  $f(\text{cm}^{-1})$  = 2953, 2929, 2893, 2858, 1680, 1462, 1347, 1251, 1195, 1103, 1044, 1021, 1002, 907, 854, 836, 778, 752, 731, 688. HR-MS:  $(\text{M}+\text{H})^+ = 373.2557$  calculated for  $\text{C}_{23}\text{H}_{37}\text{O}_2\text{Si}$ ; experimental = 373.2548.

**2-(2-((tert-butyldimethylsilyl)oxy)-3-phenylcyclopent-2-en-1-yl)-1-phenylethan-1-one (12d)**

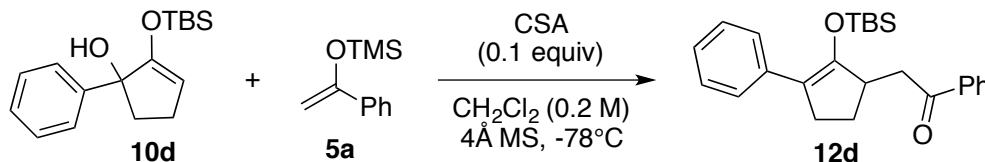

Starting material **10d** (50 mg, 0.172 mmol) was dissolved in dry  $\text{CH}_2\text{Cl}_2$  (0.90 mL), and 4Å molecular sieves (250 mg) were added. After cooling the reaction mixture to  $-78^\circ\text{C}$ , silylenol ether **5a** (71  $\mu\text{L}$ , 0.344 mmol) was added, followed by camphorsulfonic acid (4.0 mg, 0.017 mmol). The solution was stirred at  $-78^\circ\text{C}$  for 10 hours until the completion of reaction, as monitored by TLC. The reaction was quenched with triethylamine (0.1 mL) and was directly purified by flash column chromatography with 50:50 hexanes :  $\text{CH}_2\text{Cl}_2$  to afford product **12d** (56 mg, 83%) as colorless oil.

$^1\text{H}$  NMR (500 MHz):  $\delta$  = 8.01 (dd,  $J$  = 8.4, 1.4 Hz, 2H), 7.61 – 7.54 (m, 3H), 7.48 (t,  $J$  = 7.7 Hz, 2H), 7.31 (t,  $J$  = 7.7 Hz, 2H), 7.16 (t,  $J$  = 7.3 Hz, 1H), 3.38 (dd,  $J$  = 17.4, 2.5 Hz, 2H), 3.17 – 3.04 (m, 1H), 2.79 (dddd,  $J$  = 14.2, 9.3, 4.9, 1.2 Hz, 1H), 2.56 (dddd,  $J$  = 14.5, 8.8, 5.7, 2.0 Hz, 1H), 2.39 – 2.24 (m, 1H), 1.58 (ddt,  $J$  = 13.3, 9.0, 4.6 Hz, 1H), 0.96 (s, 9H), 0.13 (s, 3H), -0.01 (s, 3H).  $^{13}\text{C}$  NMR (125 MHz):  $\delta$  = 199.45, 151.54, 137.33, 136.43, 132.98, 128.57, 128.06, 127.79, 127.04, 125.72, 116.05, 42.88, 42.28, 29.80, 26.85, 25.84, 18.19, -3.74, -4.14. FT-IR:  $f(\text{cm}^{-1})$  = 3056, 2929, 2856, 1684, 1637, 1598, 1469, 1350, 1280, 1255, 1099, 1064, 1002, 968, 937, 909, 835, 779, 752, 689. HR-MS:  $(\text{M}+\text{H})^+ = 393.2244$  calculated for  $\text{C}_{25}\text{H}_{33}\text{O}_2\text{Si}$ ; experimental = 393.2259.

**2-((tert-butyldimethylsilyl)oxy)-3-(4-methoxyphenyl)cyclopent-2-en-1-yl)-1-phenylethan-1-one (12e)**

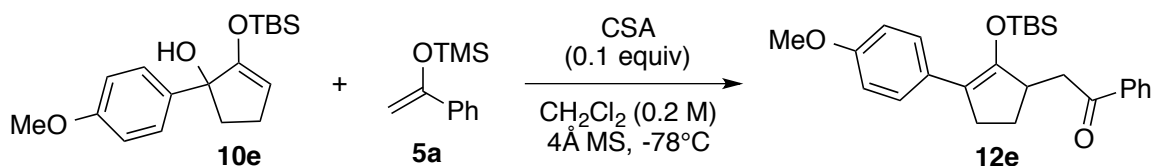

Starting material **10e** (50 mg, 0.156 mmol) was dissolved in dry CH<sub>2</sub>Cl<sub>2</sub> (0.80 mL), and 4Å molecular sieves (250 mg) were added. After cooling the reaction mixture to -78°C, silylenol ether **5a** (64 µL, 0.312 mmol) was added, followed by camphorsulfonic acid (3.6 mg, 0.016 mmol). The solution was stirred at -78°C for 10 hours until the completion of reaction, as monitored by TLC. The reaction was quenched with triethylamine (0.1 mL) and was directly purified by flash column chromatography with 50:50 hexanes : CH<sub>2</sub>Cl<sub>2</sub> to afford product **12e** (52 mg, 79%) as colorless oil.

<sup>1</sup>H NMR (500 MHz): δ = 8.00 (d, *J* = 7.2 Hz, 2H), 7.57 (t, *J* = 6.9 Hz, 1H), 7.51 (d, *J* = 7.3 Hz, 2H), 7.47 (t, *J* = 7.2 Hz, 2H), 6.85 (d, *J* = 9.0 Hz, 2H), 3.81 (s, 3H), 3.36 – 3.28 (m, 2H), 3.07 (ddd, *J* = 16.9, 10.7, 1.9 Hz, 1H), 2.73 (ddd, *J* = 14.1, 9.2, 4.5 Hz, 1H), 2.61 (s, 1H), 2.58 – 2.46 (m, 1H), 2.36 – 2.20 (m, 1H), 1.58 – 1.49 (m, 1H), 0.94 (s, 9H), 0.11 (s, 3H), -0.01 (s, 3H). <sup>13</sup>C NMR (125 MHz): δ = 199.63, 157.54, 149.92, 137.25, 129.17, 128.56, 128.29, 128.11, 128.06, 115.47, 113.20, 55.20, 42.72, 42.32, 29.84, 26.72, 25.86, 18.20, -3.72, -4.10. FT-IR: *f* (cm<sup>-1</sup>) = 2953, 2929, 2855, 1685, 1640, 1607, 1511, 1462, 1447, 1358, 1342, 1288, 1246, 1211, 1177, 1089, 1035, 834, 779, 752, 689. HR-MS: (M+H)<sup>+</sup> = 423.2350 calculated for C<sub>26</sub>H<sub>35</sub>O<sub>3</sub>Si; experimental = 423.2360.



**(2R,5R)-2-(2-oxo-2-phenylethyl)-5-phenylcyclopentan-1-one (13)**

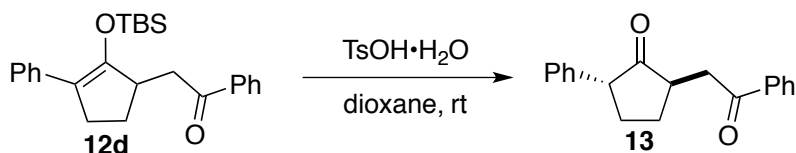

Compound **12d** (50 mg, 0.127 mmol) was dissolved in dioxane (2.0 mL), TsOH·H<sub>2</sub>O (48 mg, 0.254 mmol) was added, and the reaction mixture was stirred for 1 hour until the completion of reaction, as monitored by TLC. The reaction mixture was neutralized with aqueous sodium bicarbonate (10 mL) and extracted with EtOAc (3 x 10 mL). The combined organic layers were then washed with brine, dried over Na<sub>2</sub>SO<sub>4</sub>, and concentrated under vacuum. The crude residue was further purified by flash column chromatography with 80:20 hexanes : EtOAc to afford product **13** as an 4:1 mixture of inseparable diastereomers (29 mg, 82% yield) as a white solid. The *trans* relative stereochemistry in the major product was determined by NOE experiments.

<sup>1</sup>H NMR (500 MHz): δ= 7.91 – 7.84 (m, 2H), 7.51 – 7.44 (m, 1H), 7.40 – 7.35 (m, 2H), 7.26 – 7.22 (m, 2H), 7.17 – 7.11 (m, 3H), 3.51 (dd, *J* = 18.1, 3.2 Hz, 1H), 3.45 (dd, *J* = 12.3, 8.5 Hz, 1H), 3.10 (dd, *J* = 18.1, 7.7 Hz, 1H), 2.74 – 2.64 (m, 1H), 2.49 – 2.41 (m, 1H), 2.37 – 2.31 (m, 1H), 2.00 (qd, *J* = 12.5, 6.3 Hz, 1H), 1.62 (qd, *J* = 12.3, 6.2 Hz, 1H). <sup>13</sup>C NMR (125 MHz, \*denotes minor diastereomer): δ= 218.50\*, 218.06, 208.50\*, 197.79, 157.54\*, 138.87, 136.54, 133.33\*, 133.28, 133.26\*, 131.63\*, 128.13, 128.08\*, 128.04, 127.01\*, 126.84, 126.82\*, 54.89, 53.73\*, 45.82, 43.63, 42.47\*, 40.13\*, 39.64, 38.90, 34.00\*, 30.11, 28.92\*, 27.54, 27.48\*. FT-IR: *f* (cm<sup>-1</sup>) = 3059, 3027, 2961, 2873, 173, 1680, 1596, 1580, 1495, 1448, 1401, 1361, 1322, 1259, 1222, 1181, 1152, 1099, 1075, 998, 801, 752, 689. HR-MS (*M* + *H*)<sup>+</sup> = 279.1380 calculated for C<sub>19</sub>H<sub>19</sub>O<sub>2</sub>; experimental = 279.1377.

### 5-(2-oxo-2-phenylethyl)-2-phenylcyclopent-2-en-1-one (**14**)

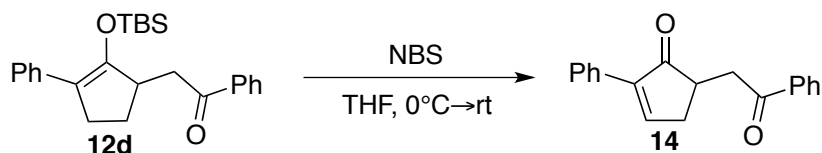

In a round bottom flask, a solution of N-bromosuccinimide (51 mg, 0.287 mmol) in dry THF (1.9 mL) was added dropwise into a solution of **12d** (75 mg, 0.191 mmol) in dry THF (1.9 mL) at 0°C. The reaction mixture was stirred at 0°C for 7 hours and then room temperature for 12 hours. The reaction was then quenched with a saturated solution of sodium thiosulfate (5 mL) and a saturated aqueous solution of sodium bicarbonate (5 mL). The reaction mixture was then partitioned between EtOAc and H<sub>2</sub>O (50 mL, 1:1). The aqueous layer extracted with EtOAc (3 x 20mL). The combined organic layers were then washed with brine, dried over Na<sub>2</sub>SO<sub>4</sub>, and concentrated under vacuum. The crude product was further purified by flash column chromatography with 90 : 10 hexanes : ethyl acetate to afford **14** as yellow oil (42 mg, 80 %).

<sup>1</sup>H NMR (500 MHz): δ= 7.99 (dd, *J* = 8.4, 1.5 Hz, 2H), 7.84 (t, *J* = 2.8 Hz, 1H), 7.77 – 7.72 (m, 2H), 7.60 – 7.56 (m, 1H), 7.48 (t, *J* = 7.8 Hz, 2H), 7.43 – 7.37 (m, 2H), 7.37 – 7.32 (m, 1H), 3.72 (dd, *J* = 17.1, 2.3 Hz, 1H), 3.22 – 3.05 (m, 3H), 2.43 (dt, *J* = 19.1, 2.3 Hz, 1H). <sup>13</sup>C NMR (125 MHz): δ= 208.48, 198.03, 157.53, 142.58, 136.44, 133.33, 131.63, 128.66, 128.42, 128.40, 128.06, 127.01, 77.20, 42.47, 40.12, 34.00. FT-IR: *f* (cm<sup>-1</sup>) = 3057, 2962, 2920, 1680, 1618, 1596, 1579, 1492, 1447, 1404, 1360, 1303, 1222, 1180, 1074, 1022, 979, 916, 873, 803, 753, 689, 616, 578. HR-MS (*M* + *H*)<sup>+</sup> = 277.1223 calculated for C<sub>19</sub>H<sub>17</sub>O<sub>2</sub>; experimental = 277.1223.

**tert-butyldimethylsilyl 5-oxo-2-(2-oxo-2-phenylethyl)-5-phenylpentanoate (15)**

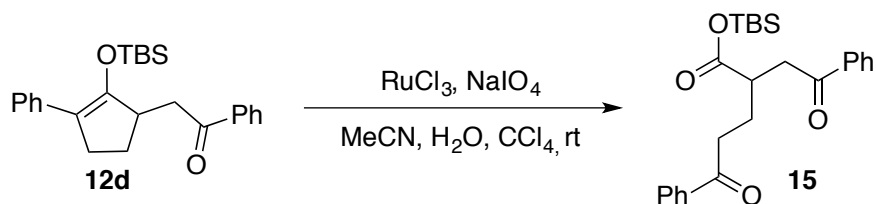

Compound **12d** (75 mg, 0.191 mmol) was dissolved in a mixture of  $\text{H}_2\text{O}:\text{CCl}_4:\text{MeCN}$  (3:2:2, 4.2 mL).  $\text{NaIO}_4$  (163 mg, 0.764 mmol) was then added, followed by  $\text{RuCl}_3$  (2.0 mg, 0.0096 mmol). The reaction mixture was stirred at room temperature for 4 hours until the completion of reaction, as monitored by TLC. The reaction mixture was quenched with saturated aqueous sodium thiosulfate (5mL), stirred for 15 min, and then extracted with dichloromethane (3 x 5 mL). The combined organic layers were then washed with brine, dried over  $\text{Na}_2\text{SO}_4$ , and concentrated under vacuum. The crude residue was further purified by flash column chromatography with 90:10 hexanes : EtOAc to afford product **15** (66 mg, 81% yield) as a clear oil.

$^1\text{H}$  NMR (500 MHz):  $\delta$  = 8.08 – 7.85 (m, 4H), 7.65 – 7.52 (m, 2H), 7.46 (t,  $J$  = 7.7 Hz, 4H), 3.55 – 3.45 (m, 1H), 3.19 – 3.07 (m, 4H), 2.17 – 2.07 (m, 2H), 0.88 (s, 9H), 0.27 (s, 3H), 0.25 (s, 3H).  $^{13}\text{C}$  NMR (125 MHz):  $\delta$  = 199.12, 197.75, 175.09, 136.71, 136.63, 133.15, 133.10, 128.59, 128.57, 127.98, 41.26, 40.86, 36.20, 26.21, 25.49, 17.56, -4.90, -4.92. FT-IR:  $f(\text{cm}^{-1})$  = 3062, 2954, 2930, 2858, 1712, 1683, 1597, 1580, 1467, 1448, 1364, 1255, 1214, 1176, 1096, 1002, 971, 938, 912, 82, 841, 823, 790, 752, 731, 688, 602. HR-MS ( $\text{M} + \text{H}^+$ ) = 425.2143 calculated for  $\text{C}_{25}\text{H}_{33}\text{O}_4\text{Si}$ ; experimental = 425.2147.

**(1*R*,1'*S*,3*R*)-2'-((*tert*-butyldimethylsilyl)oxy)-3-hydroxy-1,3'-dimethyl-[1,1'-bi(cyclopentan)]-2'-en-2-one (16)**

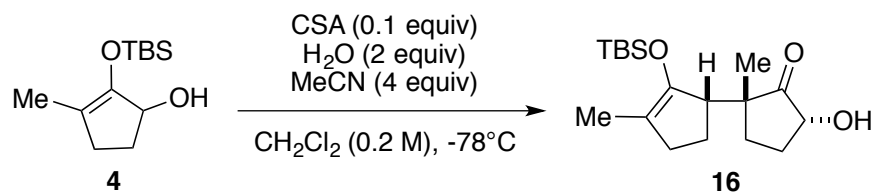

Starting material **4** (100 mg, 0.438 mmol), and MeCN (91  $\mu\text{L}$ , 1.75 mmol) were dissolved in dry  $\text{CH}_2\text{Cl}_2$  (2.2 mL). After cooling the reaction mixture to  $-78^\circ\text{C}$  deionized water (16  $\mu\text{L}$ , 0.876 mmol) and camphorsulfonic acid (20 mg, 0.088 mmol) were added. The solution was stirred at  $-78^\circ\text{C}$  for 22 hours until the completion of reaction, as monitored by TLC. The reaction was quenched with triethylamine (0.1 mL) and was directly purified by flash column chromatography with 50:50 hexanes :  $\text{CH}_2\text{Cl}_2$  to afford product **16** (40 mg, 57%) as white solid.

$^1\text{H}$  NMR (500 MHz):  $\delta$  = 4.04 (ddd,  $J$  = 10.6, 8.0, 4.1 Hz, 1H), 2.70 (d,  $J$  = 9.7 Hz, 1H), 2.61 (d,  $J$  = 4.7 Hz, 1H), 2.27 – 2.09 (m, 3H), 2.06 (ddd,  $J$  = 13.5, 7.5, 2.4 Hz, 1H), 2.03 – 1.91 (m, 1H), 1.75 (ddt,  $J$  = 13.7, 8.8, 2.3 Hz, 1H), 1.67 (dtd,  $J$  = 12.2, 11.1, 7.5 Hz, 1H), 1.57 (bs, 2H), 1.54 (s, 3H), 1.37 (ddd,  $J$  = 13.5, 11.4, 6.8 Hz, 1H), 1.05 (s, 3H), 0.94 (s, 9H), 0.14 (s, 3H), 0.06 (s, 3H).  $^{13}\text{C}$  NMR (125 MHz):  $\delta$  = 220.61, 146.77, 117.23, 74.90, 51.96, 48.84, 33.02, 28.90, 27.71, 26.00, 24.58, 22.13, 18.19, 12.94, -3.62, -4.37. FT-IR:  $f(\text{cm}^{-1})$  = 3468, 2955, 2927, 2855, 1742, 1681, 1462, 1379, 1362, 1336, 1298, 1275, 1251, 1205, 1135, 1115, 1086, 1045, 1023, 1005, 974, 926, 881, 855, 836, 803, 778, 734, 677. HR-MS:  $(\text{M}+\text{Na})^+ = 347.2013$  calculated for  $\text{C}_{18}\text{H}_{32}\text{NaO}_3\text{Si}$ ; experimental = 347.2019

## X-RAY CRYSTAL DATA

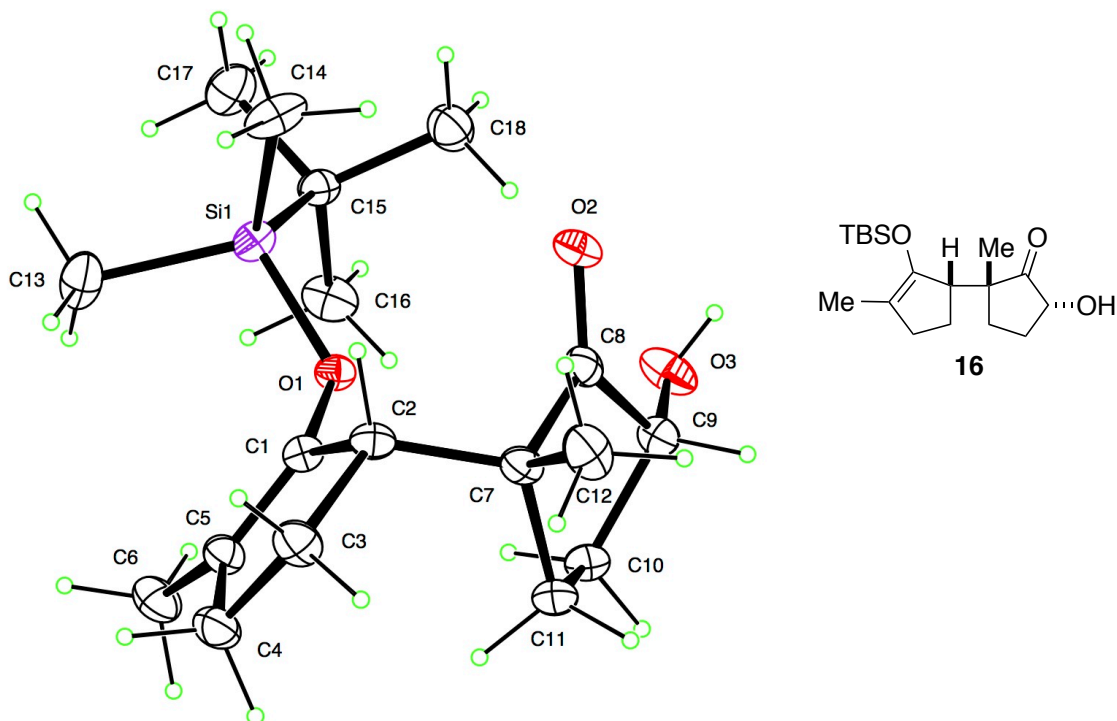

### Crystal data

|                                |                                                         |
|--------------------------------|---------------------------------------------------------|
| $C_{18}H_{32}O_3Si$            | $F(000) = 1424$                                         |
| $M_r = 324.53$                 | $D_x = 1.094 \text{ Mg m}^{-3}$                         |
| Monoclinic, $C2/c$             | Mo $K\alpha$ radiation, $\lambda = 0.71073 \text{ \AA}$ |
| Hall symbol: $-C 2yc$          | Cell parameters from 3436 reflections                   |
| $a = 29.017 (4) \text{ \AA}$   | $\theta = 2.6\text{--}26.4^\circ$                       |
| $b = 11.4978 (17) \text{ \AA}$ | $\mu = 0.13 \text{ mm}^{-1}$                            |
| $c = 12.6967 (16) \text{ \AA}$ | $T = 90 \text{ K}$                                      |
| $\beta = 111.472 (8)^\circ$    | Plate, colorless                                        |
| $V = 3942.0 (9) \text{ \AA}^3$ | $0.30 \times 0.28 \times 0.08 \text{ mm}$               |
| $Z = 8$                        |                                                         |

## Data collection

|                                                                                                 |                                                                        |
|-------------------------------------------------------------------------------------------------|------------------------------------------------------------------------|
| Nonius KappaCCD diffractometer                                                                  | 3950 independent reflections                                           |
| Radiation source: fine-focus sealed tube                                                        | 2423 reflections with $I > 2\sigma(I)$                                 |
| graphite                                                                                        | $R_{\text{int}} = 0.060$                                               |
| $\phi$ and $\omega$ scans                                                                       | $\theta_{\text{max}} = 26.3^\circ$ , $\theta_{\text{min}} = 2.8^\circ$ |
| Absorption correction: multi-scan<br><i>DENZO</i> & <i>SCALEPACK</i> (Otwinowski & Minor, 1997) | $h = -35 - 36$                                                         |
| $T_{\text{min}} = 0.944$ , $T_{\text{max}} = 0.990$                                             | $k = -14 - 12$                                                         |
| 10745 measured reflections                                                                      | $l = -15 - 15$                                                         |

## Refinement

|                                 |                                                                                     |
|---------------------------------|-------------------------------------------------------------------------------------|
| Refinement on $F^2$             | Primary atom site location: structure-invariant direct methods                      |
| Least-squares matrix: full      | Secondary atom site location: difference Fourier map                                |
| $R[F^2 > 2\sigma(F^2)] = 0.069$ | Hydrogen site location: inferred from neighbouring sites                            |
| $wR(F^2) = 0.145$               | H atoms treated by a mixture of independent and constrained refinement              |
| $S = 1.07$                      | $w = 1/[\sigma^2(F_o^2) + (0.0305P)^2 + 9.0605P]$<br>where $P = (F_o^2 + 2F_c^2)/3$ |
| 3950 reflections                | $(\Delta/\sigma)_{\text{max}} < 0.001$                                              |
| 209 parameters                  | $\Delta_{\text{max}} = 0.27 \text{ e } \text{\AA}^{-3}$                             |
| 0 restraints                    | $\Delta_{\text{min}} = -0.23 \text{ e } \text{\AA}^{-3}$                            |

## Fractional atomic coordinates and isotropic or equivalent isotropic displacement parameters ( $\text{\AA}^2$ )

|  | <i>x</i> | <i>y</i> | <i>z</i> | $U_{\text{iso}}^*/U_{\text{eq}}$ |  |
|--|----------|----------|----------|----------------------------------|--|
|--|----------|----------|----------|----------------------------------|--|

|      |                 |                 |                 |             |  |
|------|-----------------|-----------------|-----------------|-------------|--|
| Si1  | 0.58731 (3)     | 0.16366 (8)     | 0.46049 (7)     | 0.0302 (2)  |  |
| O1   | 0.61758 (7)     | 0.26041<br>(17) | 0.55928<br>(16) | 0.0262 (5)  |  |
| O2   | 0.69316 (8)     | 0.35988<br>(19) | 0.45389<br>(18) | 0.0353 (6)  |  |
| C1   | 0.59887<br>(11) | 0.3687 (3)      | 0.5703 (2)      | 0.0280 (7)  |  |
| O3   | 0.75160<br>(10) | 0.2410 (2)      | 0.6616 (2)      | 0.0466 (7)  |  |
| H3O  | 0.7663 (15)     | 0.236 (4)       | 0.620 (3)       | 0.070*      |  |
| C15  | 0.62385<br>(12) | 0.0248 (3)      | 0.4983 (3)      | 0.0310 (8)  |  |
| C13  | 0.52378<br>(12) | 0.1432 (3)      | 0.4616 (3)      | 0.0479 (10) |  |
| H13A | 0.5259          | 0.1068          | 0.5330          | 0.072*      |  |
| H13B | 0.5046          | 0.0931          | 0.3983          | 0.072*      |  |
| H13C | 0.5074          | 0.2189          | 0.4541          | 0.072*      |  |
| C7   | 0.66996<br>(12) | 0.4998 (3)      | 0.5702 (3)      | 0.0296 (7)  |  |
| C11  | 0.69089<br>(12) | 0.5071 (3)      | 0.7021 (3)      | 0.0383 (9)  |  |
| H11A | 0.7156          | 0.5704          | 0.7284          | 0.046*      |  |
| H11B | 0.6639          | 0.5221          | 0.7305          | 0.046*      |  |
| C8   | 0.69902<br>(11) | 0.3991 (3)      | 0.5472 (3)      | 0.0294 (7)  |  |
| C5   | 0.57198<br>(11) | 0.3918 (3)      | 0.6332 (3)      | 0.0316 (8)  |  |
| C9   | 0.73799<br>(12) | 0.3581 (3)      | 0.6577 (3)      | 0.0338 (8)  |  |
| H9   | 0.7684          | 0.4067          | 0.6733          | 0.041*      |  |
| C6   | 0.55711<br>(13) | 0.3073 (3)      | 0.7049 (3)      | 0.0436 (9)  |  |
| H6A  | 0.5212          | 0.2949          | 0.6721          | 0.065*      |  |
| H6B  | 0.5662          | 0.3386          | 0.7816          | 0.065*      |  |

|      |                 |             |            |             |  |
|------|-----------------|-------------|------------|-------------|--|
| H6C  | 0.5742          | 0.2331      | 0.7078     | 0.065*      |  |
| C12  | 0.68169<br>(14) | 0.6096 (3)  | 0.5148 (3) | 0.0457 (9)  |  |
| H12A | 0.7176          | 0.6202      | 0.5410     | 0.069*      |  |
| H12B | 0.6666          | 0.6776      | 0.5360     | 0.069*      |  |
| H12C | 0.6682          | 0.6006      | 0.4323     | 0.069*      |  |
| C2   | 0.61372<br>(11) | 0.4744 (3)  | 0.5200 (3) | 0.0295 (7)  |  |
| H2   | 0.6032          | 0.4636      | 0.4363     | 0.035*      |  |
| C10  | 0.71509<br>(12) | 0.3890 (3)  | 0.7440 (3) | 0.0373 (8)  |  |
| H10A | 0.7407          | 0.3953      | 0.8210     | 0.045*      |  |
| H10B | 0.6902          | 0.3306      | 0.7446     | 0.045*      |  |
| C14  | 0.58236<br>(15) | 0.2184 (3)  | 0.3189 (3) | 0.0495 (10) |  |
| H14A | 0.5581          | 0.2818      | 0.2959     | 0.074*      |  |
| H14B | 0.5716          | 0.1551      | 0.2636     | 0.074*      |  |
| H14C | 0.6147          | 0.2472      | 0.3227     | 0.074*      |  |
| C4   | 0.56079<br>(13) | 0.5194 (3)  | 0.6308 (3) | 0.0408 (9)  |  |
| H4A  | 0.5775          | 0.5547      | 0.7064     | 0.049*      |  |
| H4B  | 0.5247          | 0.5329      | 0.6065     | 0.049*      |  |
| C3   | 0.58121<br>(13) | 0.5704 (3)  | 0.5442 (3) | 0.0380 (8)  |  |
| H3A  | 0.6013          | 0.6407      | 0.5754     | 0.046*      |  |
| H3B  | 0.5537          | 0.5921      | 0.4736     | 0.046*      |  |
| C16  | 0.63830<br>(14) | -0.0020 (3) | 0.6244 (3) | 0.0457 (9)  |  |
| H16A | 0.6084          | -0.0076     | 0.6426     | 0.069*      |  |
| H16B | 0.6595          | 0.0603      | 0.6692     | 0.069*      |  |
| H16C | 0.6563          | -0.0760     | 0.6420     | 0.069*      |  |
| C17  | 0.59231<br>(13) | -0.0750 (3) | 0.4285 (3) | 0.0466 (10) |  |



|      |                 |            |            |            |  |
|------|-----------------|------------|------------|------------|--|
| H17A | 0.6121          | -0.1465    | 0.4432     | 0.070*     |  |
| H17B | 0.5812          | -0.0558    | 0.3479     | 0.070*     |  |
| H17C | 0.5634          | -0.0867    | 0.4499     | 0.070*     |  |
| C18  | 0.67148<br>(13) | 0.0341 (3) | 0.4717 (3) | 0.0439 (9) |  |
| H18A | 0.6923          | 0.0968     | 0.5168     | 0.066*     |  |
| H18B | 0.6628          | 0.0509     | 0.3910     | 0.066*     |  |
| H18C | 0.6897          | -0.0396    | 0.4904     | 0.066*     |  |

### Atomic displacement parameters ( $\text{\AA}^2$ )

|     | $U^{11}$       | $U^{22}$       | $U^{33}$       | $U^{12}$        | $U^{13}$       | $U^{23}$        |
|-----|----------------|----------------|----------------|-----------------|----------------|-----------------|
| Si1 | 0.0340 (5)     | 0.0254 (5)     | 0.0278 (5)     | -0.0022<br>(4)  | 0.0074 (4)     | 0.0016 (4)      |
| O1  | 0.0321<br>(12) | 0.0224<br>(12) | 0.0253<br>(11) | -0.0006<br>(9)  | 0.0120 (9)     | -0.0003<br>(9)  |
| O2  | 0.0458<br>(14) | 0.0354<br>(14) | 0.0326<br>(13) | 0.0016<br>(11)  | 0.0235<br>(11) | -0.0019<br>(11) |
| C1  | 0.0306<br>(17) | 0.0270<br>(18) | 0.0251<br>(17) | -0.0006<br>(14) | 0.0088<br>(14) | -0.0019<br>(14) |
| O3  | 0.0598<br>(17) | 0.0493<br>(16) | 0.0418<br>(15) | 0.0212<br>(13)  | 0.0318<br>(13) | 0.0142<br>(13)  |
| C15 | 0.0363<br>(18) | 0.0311<br>(19) | 0.0259<br>(17) | -0.0028<br>(15) | 0.0117<br>(15) | -0.0018<br>(14) |
| C13 | 0.0330<br>(19) | 0.040 (2)      | 0.063 (2)      | -0.0006<br>(17) | 0.0088<br>(18) | -0.001 (2)      |
| C7  | 0.0379<br>(18) | 0.0206<br>(16) | 0.0353<br>(18) | -0.0022<br>(14) | 0.0194<br>(15) | -0.0031<br>(14) |
| C11 | 0.041 (2)      | 0.039 (2)      | 0.038 (2)      | -0.0047<br>(17) | 0.0175<br>(17) | -0.0162<br>(17) |
| C8  | 0.0314<br>(18) | 0.0267<br>(18) | 0.0362<br>(19) | -0.0052<br>(14) | 0.0194<br>(15) | -0.0017<br>(15) |
| C5  | 0.0325<br>(18) | 0.036 (2)      | 0.0296<br>(18) | 0.0000<br>(15)  | 0.0147<br>(15) | 0.0002<br>(15)  |

|     |                |                |                |                 |                |                 |
|-----|----------------|----------------|----------------|-----------------|----------------|-----------------|
| C9  | 0.0348<br>(18) | 0.037 (2)      | 0.0326<br>(18) | -0.0008<br>(16) | 0.0159<br>(15) | -0.0028<br>(16) |
| C6  | 0.048 (2)      | 0.052 (2)      | 0.040 (2)      | 0.0018<br>(19)  | 0.0270<br>(17) | 0.0051<br>(18)  |
| C12 | 0.050 (2)      | 0.030 (2)      | 0.066 (3)      | -0.0016<br>(18) | 0.032 (2)      | 0.0025<br>(19)  |
| C2  | 0.0388<br>(19) | 0.0244<br>(17) | 0.0267<br>(17) | 0.0018<br>(15)  | 0.0137<br>(15) | -0.0009<br>(14) |
| C10 | 0.0383<br>(19) | 0.047 (2)      | 0.0261<br>(18) | -0.0017<br>(17) | 0.0114<br>(15) | -0.0070<br>(16) |
| C14 | 0.071 (3)      | 0.036 (2)      | 0.0289<br>(19) | -0.010 (2)      | 0.0044<br>(18) | -0.0025<br>(17) |
| C4  | 0.044 (2)      | 0.040 (2)      | 0.046 (2)      | 0.0015<br>(17)  | 0.0250<br>(18) | -0.0082<br>(18) |
| C3  | 0.045 (2)      | 0.0247<br>(18) | 0.049 (2)      | 0.0039<br>(16)  | 0.0228<br>(17) | -0.0014<br>(16) |
| C16 | 0.059 (2)      | 0.042 (2)      | 0.038 (2)      | 0.0151<br>(19)  | 0.0202<br>(19) | 0.0110<br>(18)  |
| C17 | 0.049 (2)      | 0.030 (2)      | 0.055 (2)      | -0.0017<br>(18) | 0.0114<br>(19) | -0.0041<br>(18) |
| C18 | 0.042 (2)      | 0.044 (2)      | 0.049 (2)      | 0.0020<br>(18)  | 0.0210<br>(18) | -0.0027<br>(19) |

#### Geometric parameters (Å, °)

|         |           |          |           |
|---------|-----------|----------|-----------|
| Si1—O1  | 1.666 (2) | C6—H6A   | 0.9800    |
| Si1—C14 | 1.860 (3) | C6—H6B   | 0.9800    |
| Si1—C13 | 1.864 (3) | C6—H6C   | 0.9800    |
| Si1—C15 | 1.879 (3) | C12—H12A | 0.9800    |
| O1—C1   | 1.386 (4) | C12—H12B | 0.9800    |
| O2—C8   | 1.220 (3) | C12—H12C | 0.9800    |
| C1—C5   | 1.331 (4) | C2—C3    | 1.554 (4) |
| C1—C2   | 1.508 (4) | C2—H2    | 1.0000    |
| O3—C9   | 1.399 (4) | C10—H10A | 0.9900    |

|             |             |               |           |
|-------------|-------------|---------------|-----------|
| O3—H3O      | 0.80 (4)    | C10—H10B      | 0.9900    |
| C15—C16     | 1.531 (4)   | C14—H14A      | 0.9800    |
| C15—C17     | 1.531 (4)   | C14—H14B      | 0.9800    |
| C15—C18     | 1.542 (4)   | C14—H14C      | 0.9800    |
| C13—H13A    | 0.9800      | C4—C3         | 1.544 (4) |
| C13—H13B    | 0.9800      | C4—H4A        | 0.9900    |
| C13—H13C    | 0.9800      | C4—H4B        | 0.9900    |
| C7—C8       | 1.522 (4)   | C3—H3A        | 0.9900    |
| C7—C12      | 1.542 (4)   | C3—H3B        | 0.9900    |
| C7—C2       | 1.547 (4)   | C16—H16A      | 0.9800    |
| C7—C11      | 1.560 (4)   | C16—H16B      | 0.9800    |
| C11—C10     | 1.532 (5)   | C16—H16C      | 0.9800    |
| C11—H11A    | 0.9900      | C17—H17A      | 0.9800    |
| C11—H11B    | 0.9900      | C17—H17B      | 0.9800    |
| C8—C9       | 1.519 (4)   | C17—H17C      | 0.9800    |
| C5—C6       | 1.499 (4)   | C18—H18A      | 0.9800    |
| C5—C4       | 1.500 (5)   | C18—H18B      | 0.9800    |
| C9—C10      | 1.517 (4)   | C18—H18C      | 0.9800    |
| C9—H9       | 1.0000      |               |           |
|             |             |               |           |
| O1—Si1—C14  | 109.53 (14) | C7—C12—H12B   | 109.5     |
| O1—Si1—C13  | 109.21 (14) | H12A—C12—H12B | 109.5     |
| C14—Si1—C13 | 108.88 (18) | C7—C12—H12C   | 109.5     |
| O1—Si1—C15  | 106.41 (12) | H12A—C12—H12C | 109.5     |
| C14—Si1—C15 | 111.78 (16) | H12B—C12—H12C | 109.5     |
| C13—Si1—C15 | 110.98 (15) | C1—C2—C7      | 113.5 (3) |
| C1—O1—Si1   | 123.92 (18) | C1—C2—C3      | 101.6 (2) |
| C5—C1—O1    | 125.2 (3)   | C7—C2—C3      | 114.2 (3) |
| C5—C1—C2    | 114.5 (3)   | C1—C2—H2      | 109.1     |
| O1—C1—C2    | 119.9 (2)   | C7—C2—H2      | 109.1     |
| C9—O3—H3O   | 105 (3)     | C3—C2—H2      | 109.1     |

|               |           |               |           |
|---------------|-----------|---------------|-----------|
| C16—C15—C17   | 109.3 (3) | C9—C10—C11    | 102.9 (3) |
| C16—C15—C18   | 108.6 (3) | C9—C10—H10A   | 111.2     |
| C17—C15—C18   | 108.6 (3) | C11—C10—H10A  | 111.2     |
| C16—C15—Si1   | 110.5 (2) | C9—C10—H10B   | 111.2     |
| C17—C15—Si1   | 109.1 (2) | C11—C10—H10B  | 111.2     |
| C18—C15—Si1   | 110.7 (2) | H10A—C10—H10B | 109.1     |
| Si1—C13—H13A  | 109.5     | Si1—C14—H14A  | 109.5     |
| Si1—C13—H13B  | 109.5     | Si1—C14—H14B  | 109.5     |
| H13A—C13—H13B | 109.5     | H14A—C14—H14B | 109.5     |
| Si1—C13—H13C  | 109.5     | Si1—C14—H14C  | 109.5     |
| H13A—C13—H13C | 109.5     | H14A—C14—H14C | 109.5     |
| H13B—C13—H13C | 109.5     | H14B—C14—H14C | 109.5     |
| C8—C7—C12     | 107.8 (2) | C5—C4—C3      | 104.4 (3) |
| C8—C7—C2      | 110.6 (2) | C5—C4—H4A     | 110.9     |
| C12—C7—C2     | 110.0 (3) | C3—C4—H4A     | 110.9     |
| C8—C7—C11     | 102.8 (3) | C5—C4—H4B     | 110.9     |
| C12—C7—C11    | 112.4 (3) | C3—C4—H4B     | 110.9     |
| C2—C7—C11     | 113.0 (2) | H4A—C4—H4B    | 108.9     |
| C10—C11—C7    | 105.9 (2) | C4—C3—C2      | 106.9 (3) |
| C10—C11—H11A  | 110.6     | C4—C3—H3A     | 110.3     |
| C7—C11—H11A   | 110.6     | C2—C3—H3A     | 110.3     |
| C10—C11—H11B  | 110.6     | C4—C3—H3B     | 110.3     |
| C7—C11—H11B   | 110.6     | C2—C3—H3B     | 110.3     |
| H11A—C11—H11B | 108.7     | H3A—C3—H3B    | 108.6     |
| O2—C8—C9      | 125.0 (3) | C15—C16—H16A  | 109.5     |
| O2—C8—C7      | 125.3 (3) | C15—C16—H16B  | 109.5     |
| C9—C8—C7      | 109.7 (3) | H16A—C16—H16B | 109.5     |
| C1—C5—C6      | 126.7 (3) | C15—C16—H16C  | 109.5     |
| C1—C5—C4      | 110.7 (3) | H16A—C16—H16C | 109.5     |
| C6—C5—C4      | 122.5 (3) | H16B—C16—H16C | 109.5     |
| O3—C9—C10     | 113.1 (3) | C15—C17—H17A  | 109.5     |

|                     |            |               |            |
|---------------------|------------|---------------|------------|
| O3—C9—C8            | 115.9 (3)  | C15—C17—H17B  | 109.5      |
| C10—C9—C8           | 102.7 (3)  | H17A—C17—H17B | 109.5      |
| O3—C9—H9            | 108.3      | C15—C17—H17C  | 109.5      |
| C10—C9—H9           | 108.3      | H17A—C17—H17C | 109.5      |
| C8—C9—H9            | 108.3      | H17B—C17—H17C | 109.5      |
| C5—C6—H6A           | 109.5      | C15—C18—H18A  | 109.5      |
| C5—C6—H6B           | 109.5      | C15—C18—H18B  | 109.5      |
| H6A—C6—H6B          | 109.5      | H18A—C18—H18B | 109.5      |
| C5—C6—H6C           | 109.5      | C15—C18—H18C  | 109.5      |
| H6A—C6—H6C          | 109.5      | H18A—C18—H18C | 109.5      |
| H6B—C6—H6C          | 109.5      | H18B—C18—H18C | 109.5      |
| C7—C12—H12A         | 109.5      |               |            |
|                     |            |               |            |
| C14—Si1—O1—C1       | 68.4 (3)   | O1—C1—C5—C4   | 176.5 (3)  |
| C13—Si1—O1—C1       | -50.7 (3)  | C2—C1—C5—C4   | 3.6 (4)    |
| C15—Si1—O1—C1       | -170.6 (2) | O2—C8—C9—O3   | -30.5 (4)  |
| Si1—O1—C1—C5        | 89.9 (3)   | C7—C8—C9—O3   | 151.9 (3)  |
| Si1—O1—C1—C2        | -97.6 (3)  | O2—C8—C9—C10  | -154.3 (3) |
| O1—Si1—C15—<br>C16  | 46.4 (3)   | C7—C8—C9—C10  | 28.1 (3)   |
| C14—Si1—C15—<br>C16 | 166.0 (2)  | C5—C1—C2—C7   | 111.9 (3)  |
| C13—Si1—C15—<br>C16 | -72.3 (3)  | O1—C1—C2—C7   | -61.4 (4)  |
| O1—Si1—C15—<br>C17  | 166.6 (2)  | C5—C1—C2—C3   | -11.2 (4)  |
| C14—Si1—C15—<br>C17 | -73.8 (3)  | O1—C1—C2—C3   | 175.6 (3)  |
| C13—Si1—C15—<br>C17 | 47.9 (3)   | C8—C7—C2—C1   | 61.6 (3)   |
| O1—Si1—C15—<br>C18  | -73.9 (2)  | C12—C7—C2—C1  | -179.5 (3) |
| C14—Si1—C15—        | 45.6 (3)   | C11—C7—C2—C1  | -53.0 (3)  |

|                     |            |                   |            |
|---------------------|------------|-------------------|------------|
| C18                 |            |                   |            |
| C13—Si1—C15—<br>C18 | 167.4 (2)  | C8—C7—C2—C3       | 177.4 (3)  |
| C8—C7—C11—C10       | -19.5 (3)  | C12—C7—C2—C3      | -63.7 (3)  |
| C12—C7—C11—<br>C10  | -135.1 (3) | C11—C7—C2—C3      | 62.8 (3)   |
| C2—C7—C11—C10       | 99.7 (3)   | O3—C9—C10—<br>C11 | -164.9 (3) |
| C12—C7—C8—O2        | -64.0 (4)  | C8—C9—C10—C11     | -39.2 (3)  |
| C2—C7—C8—O2         | 56.3 (4)   | C7—C11—C10—C9     | 37.1 (3)   |
| C11—C7—C8—O2        | 177.1 (3)  | C1—C5—C4—C3       | 5.7 (4)    |
| C12—C7—C8—C9        | 113.5 (3)  | C6—C5—C4—C3       | -178.3 (3) |
| C2—C7—C8—C9         | -126.2 (3) | C5—C4—C3—C2       | -12.3 (4)  |
| C11—C7—C8—C9        | -5.3 (3)   | C1—C2—C3—C4       | 13.8 (3)   |
| O1—C1—C5—C6         | 0.8 (5)    | C7—C2—C3—C4       | -108.8 (3) |
| C2—C1—C5—C6         | -172.1 (3) |                   |            |

### Hydrogen-bond geometry (Å, °)

| <i>D</i> —H... <i>A</i>  | <i>D</i> —H | H... <i>A</i> | <i>D</i> ... <i>A</i> | <i>D</i> —H... <i>A</i> |
|--------------------------|-------------|---------------|-----------------------|-------------------------|
| O3—H3O...O2 <sup>i</sup> | 0.80 (4)    | 2.07 (4)      | 2.790 (3)             | 151 (4)                 |

Symmetry code: (i) -x+3/2, -y+1/2, -z+1.

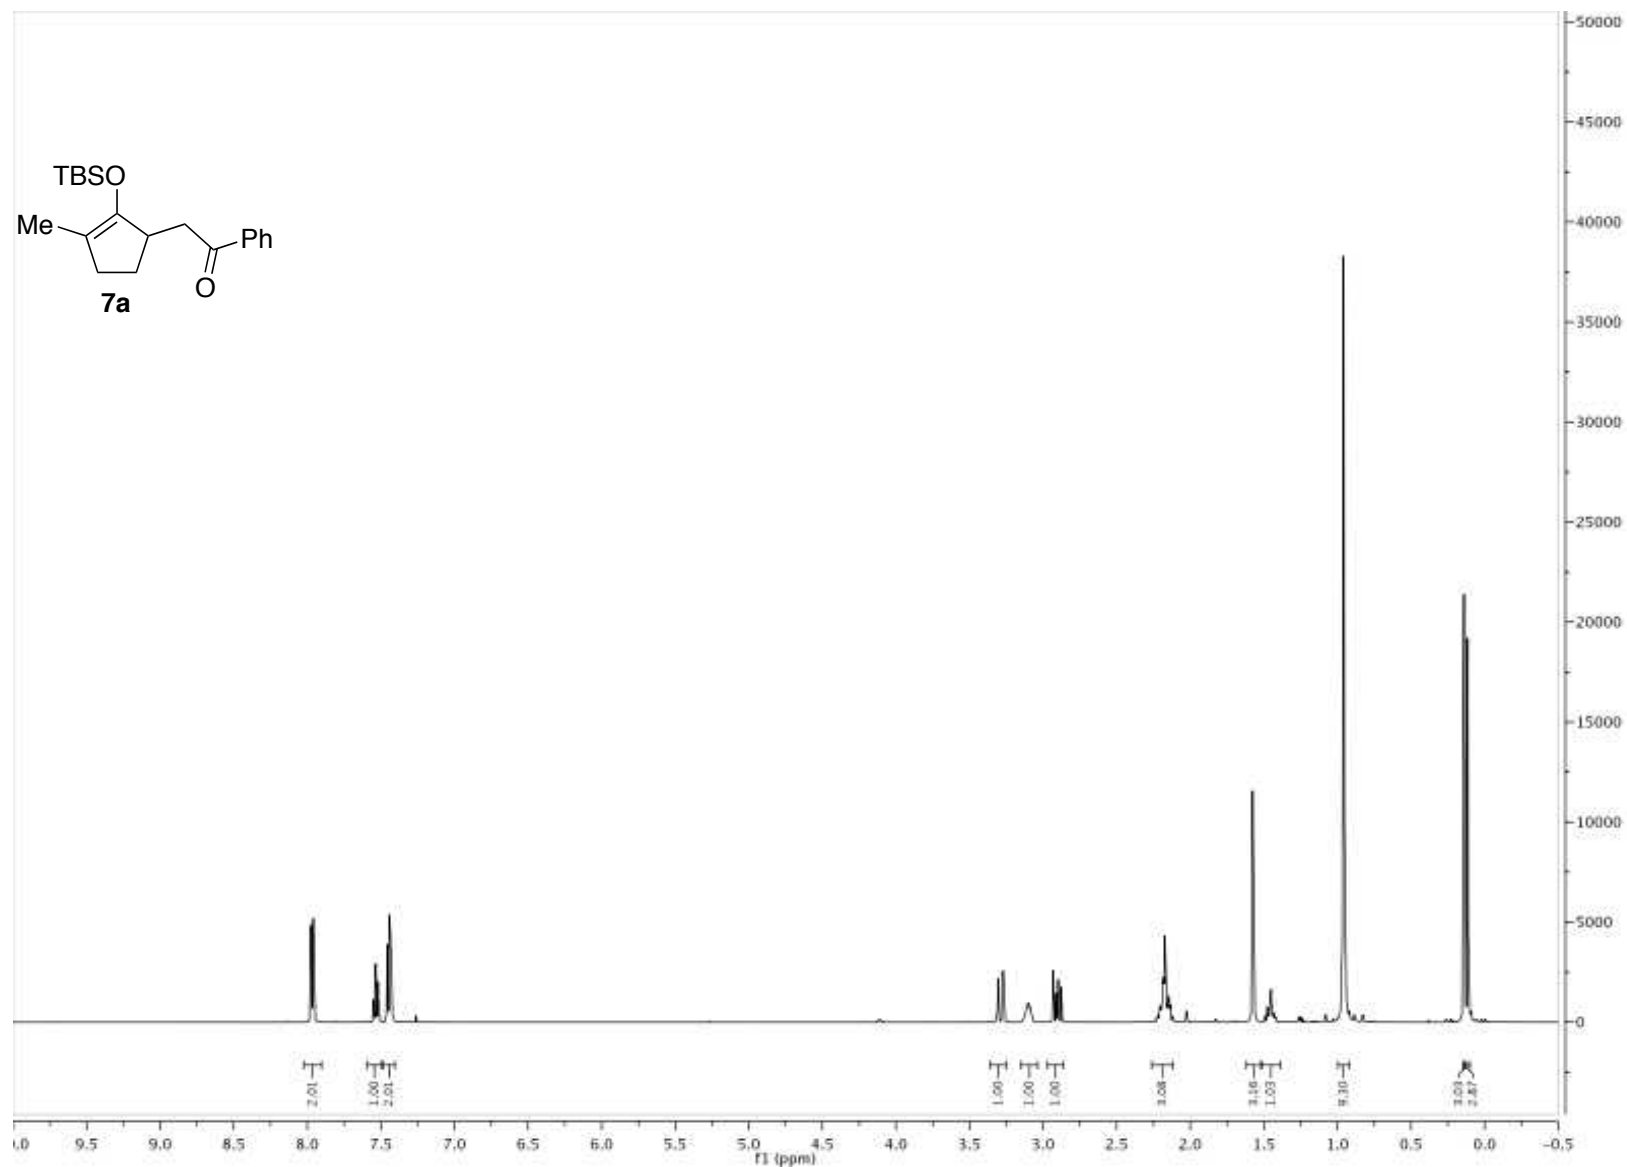

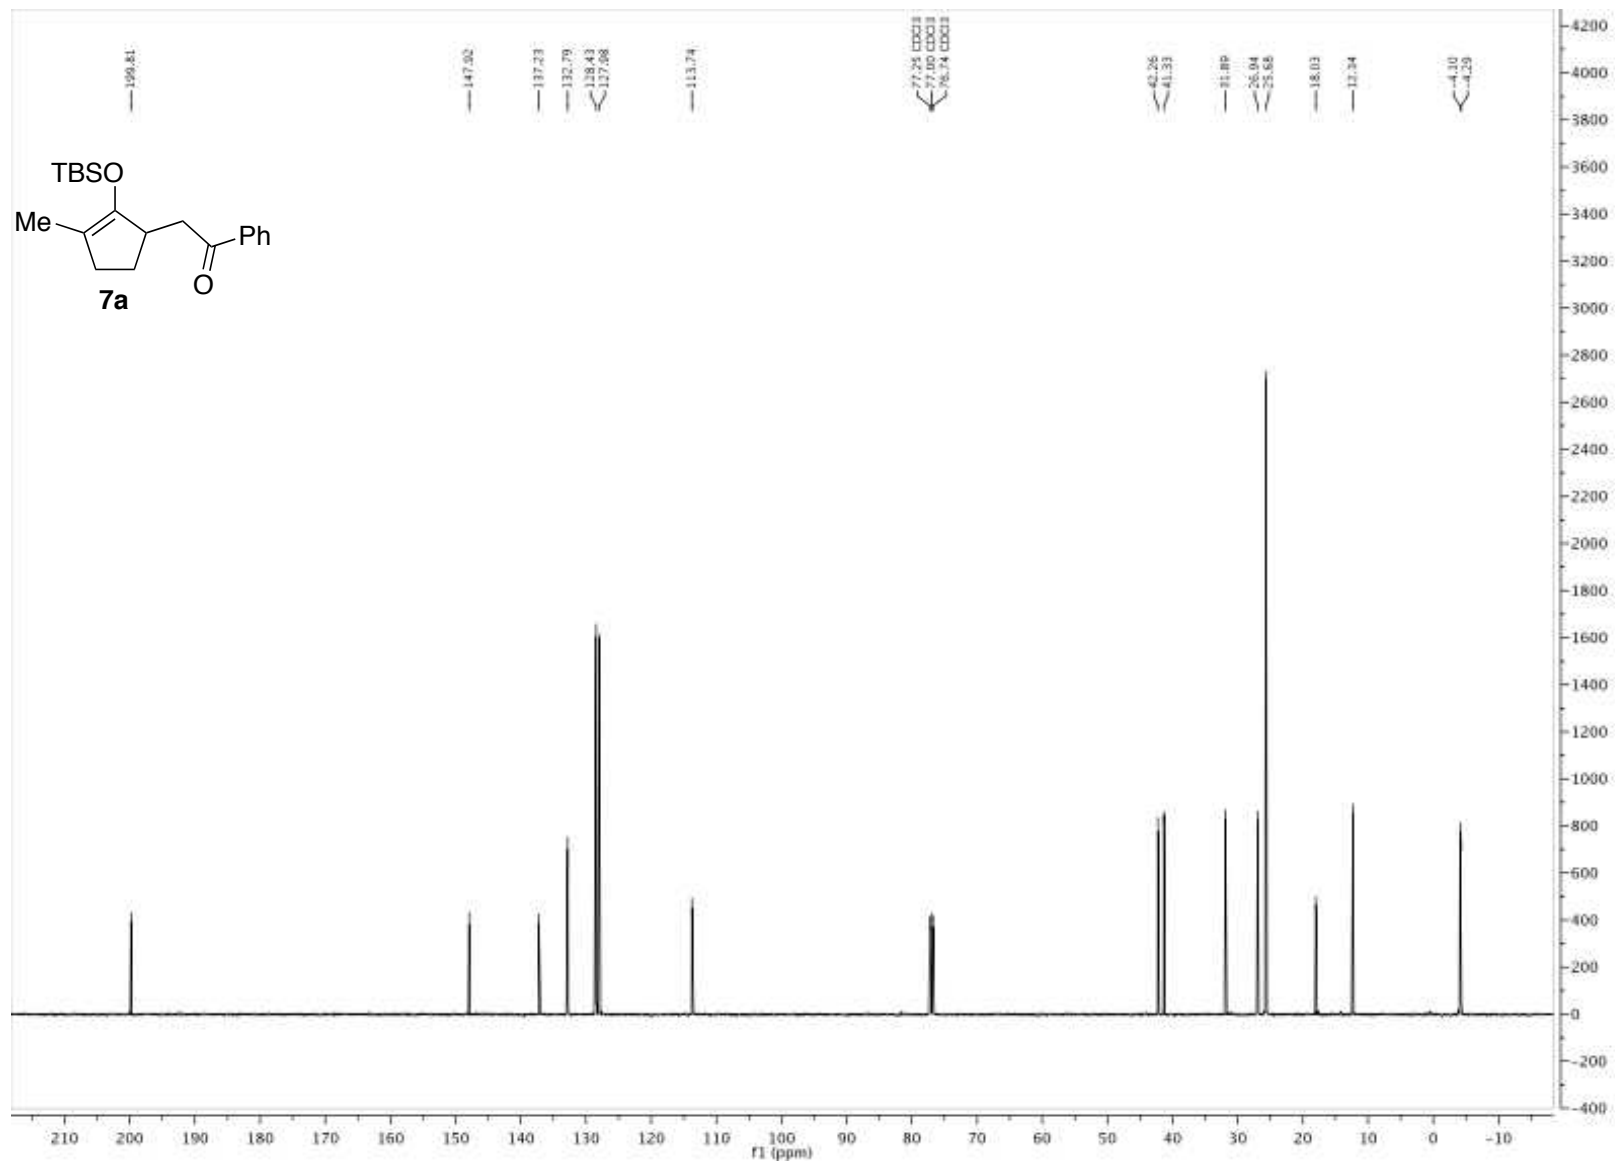







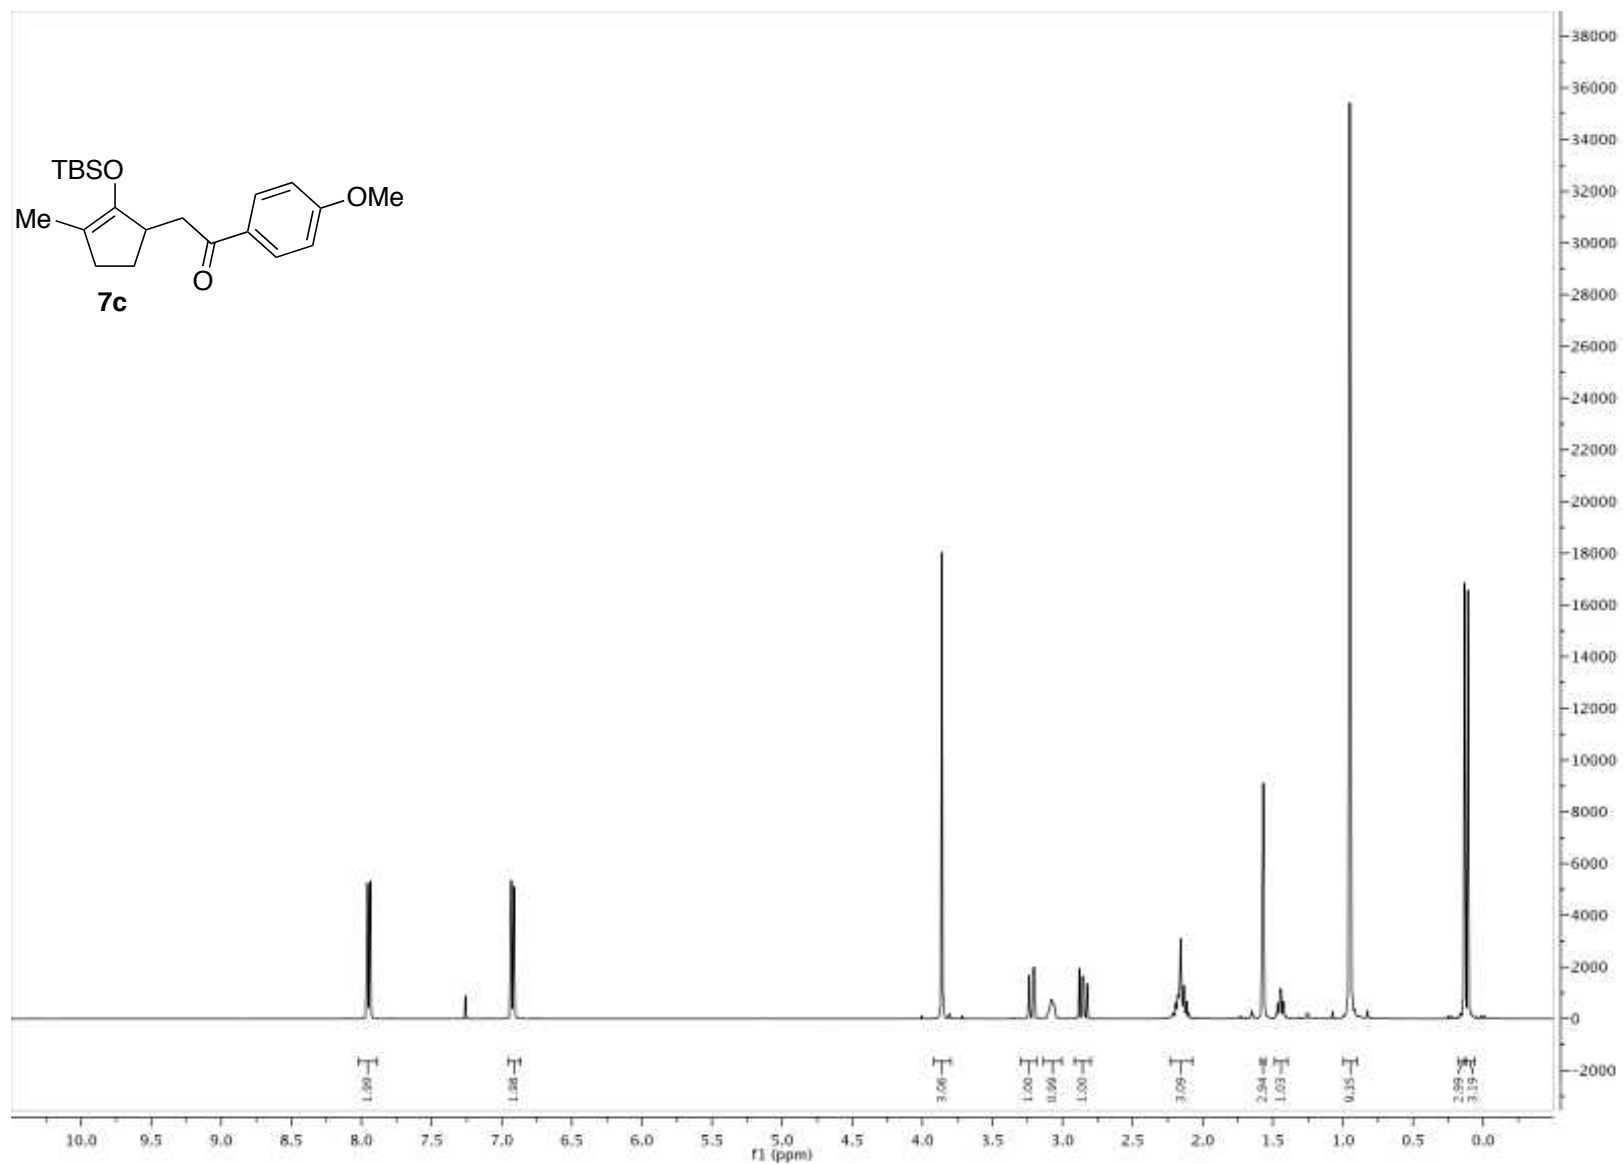

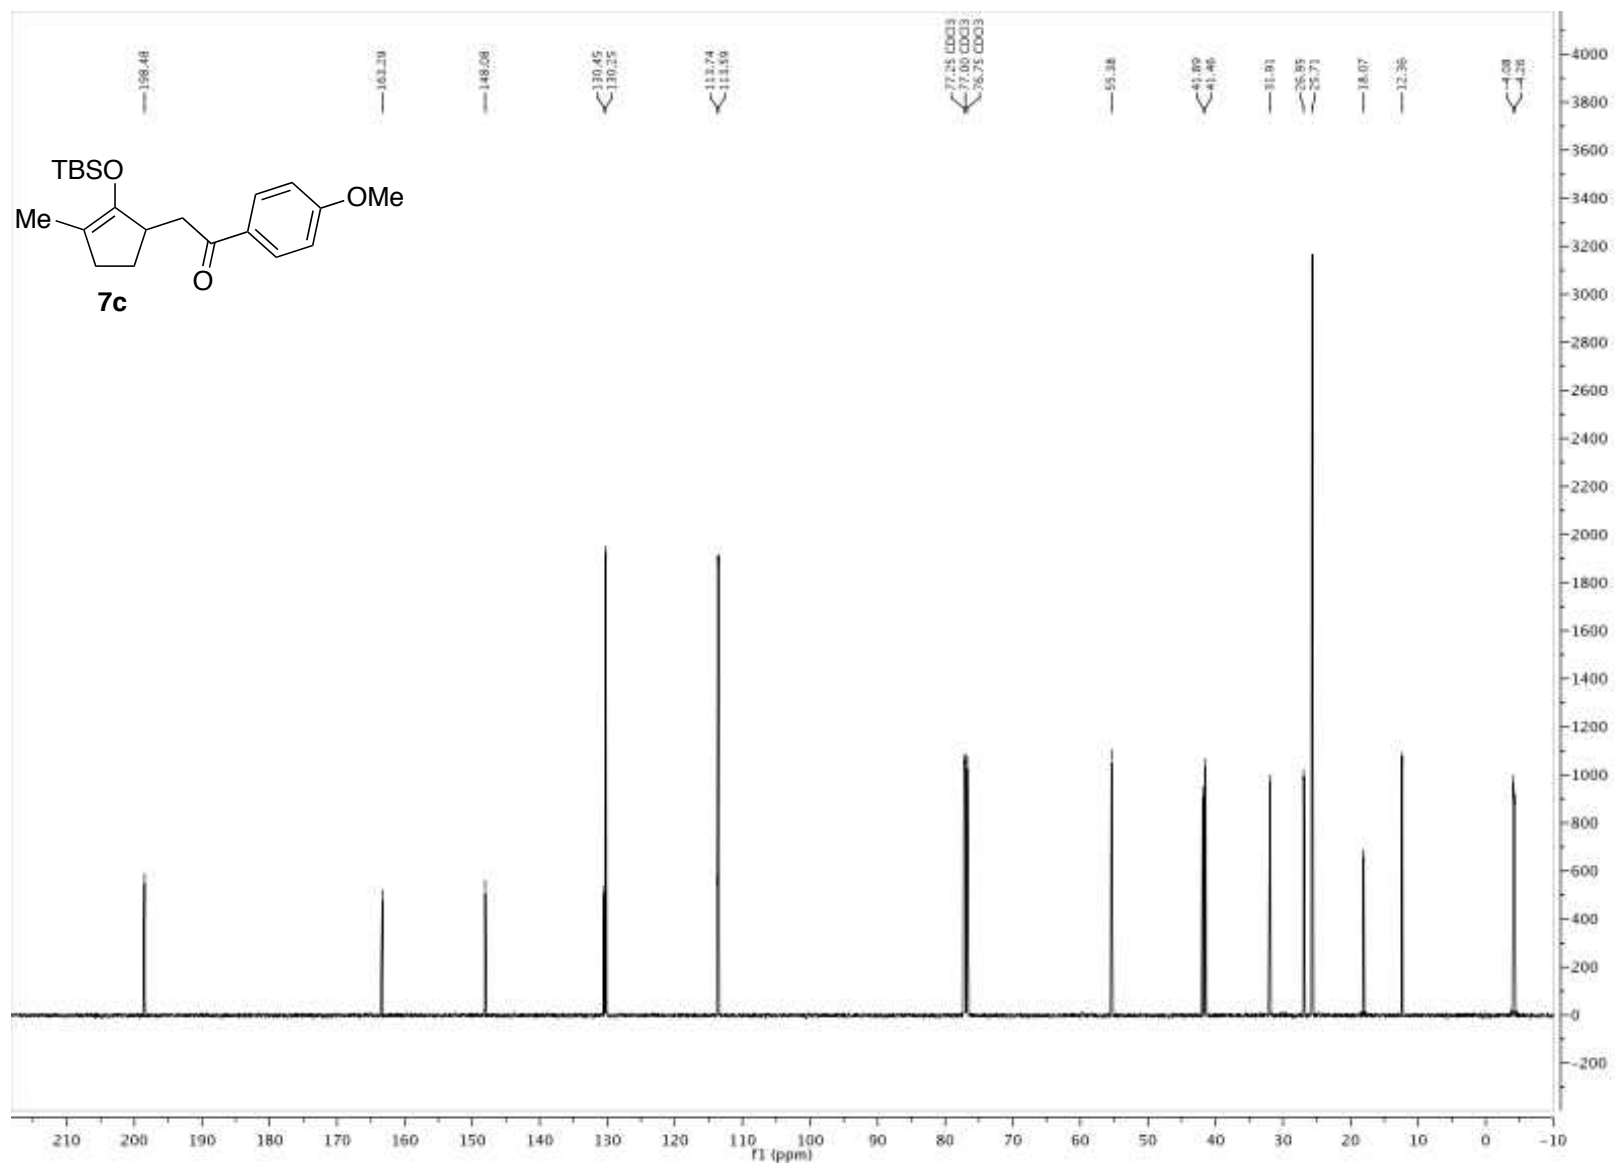



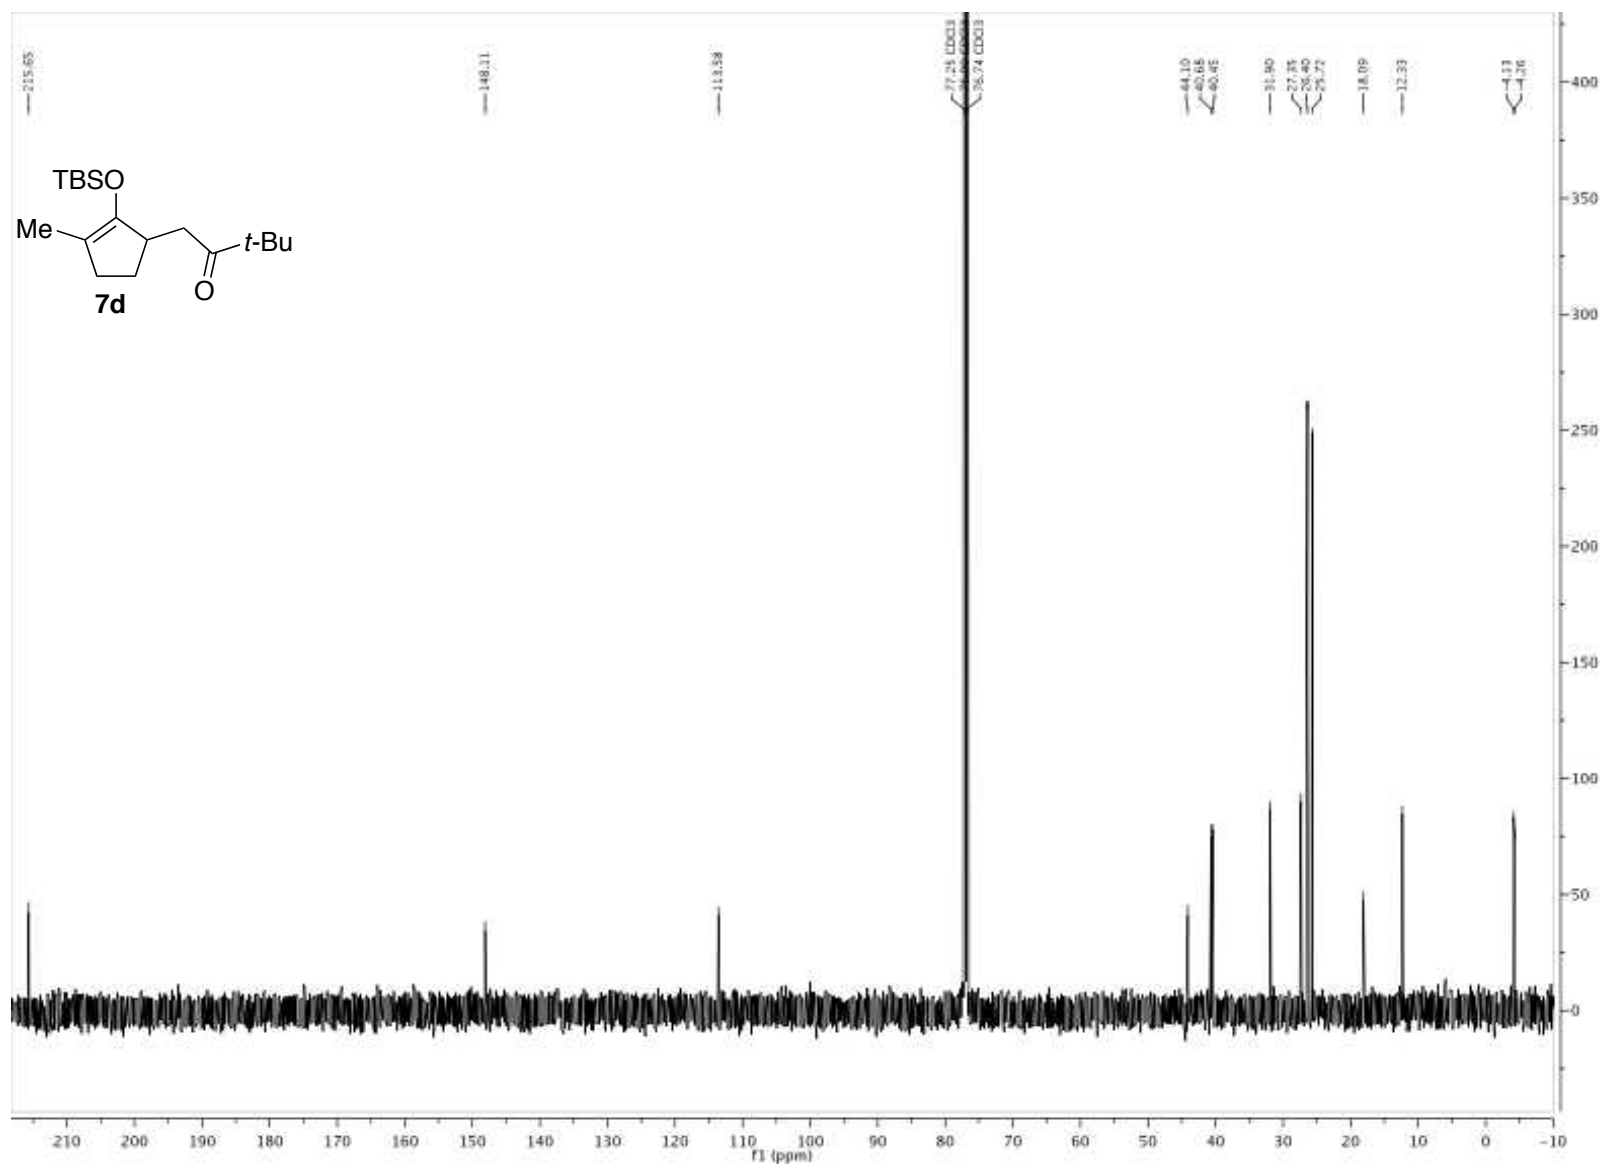

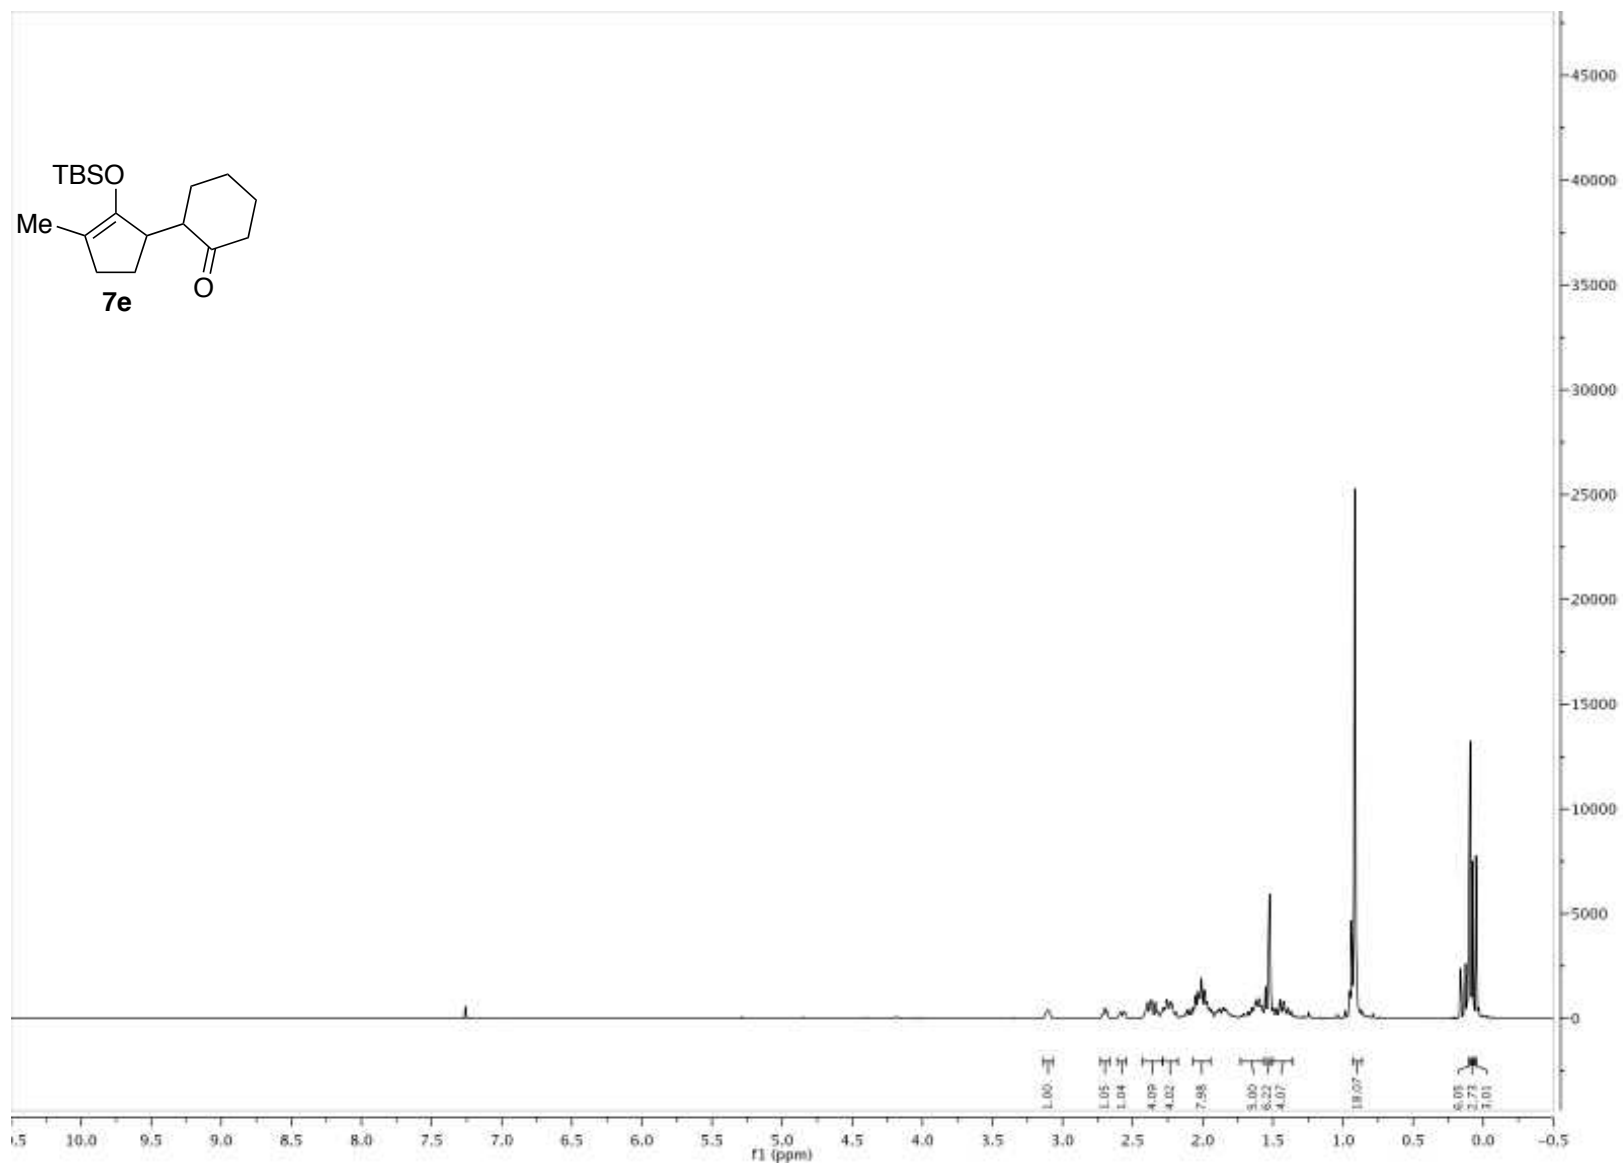





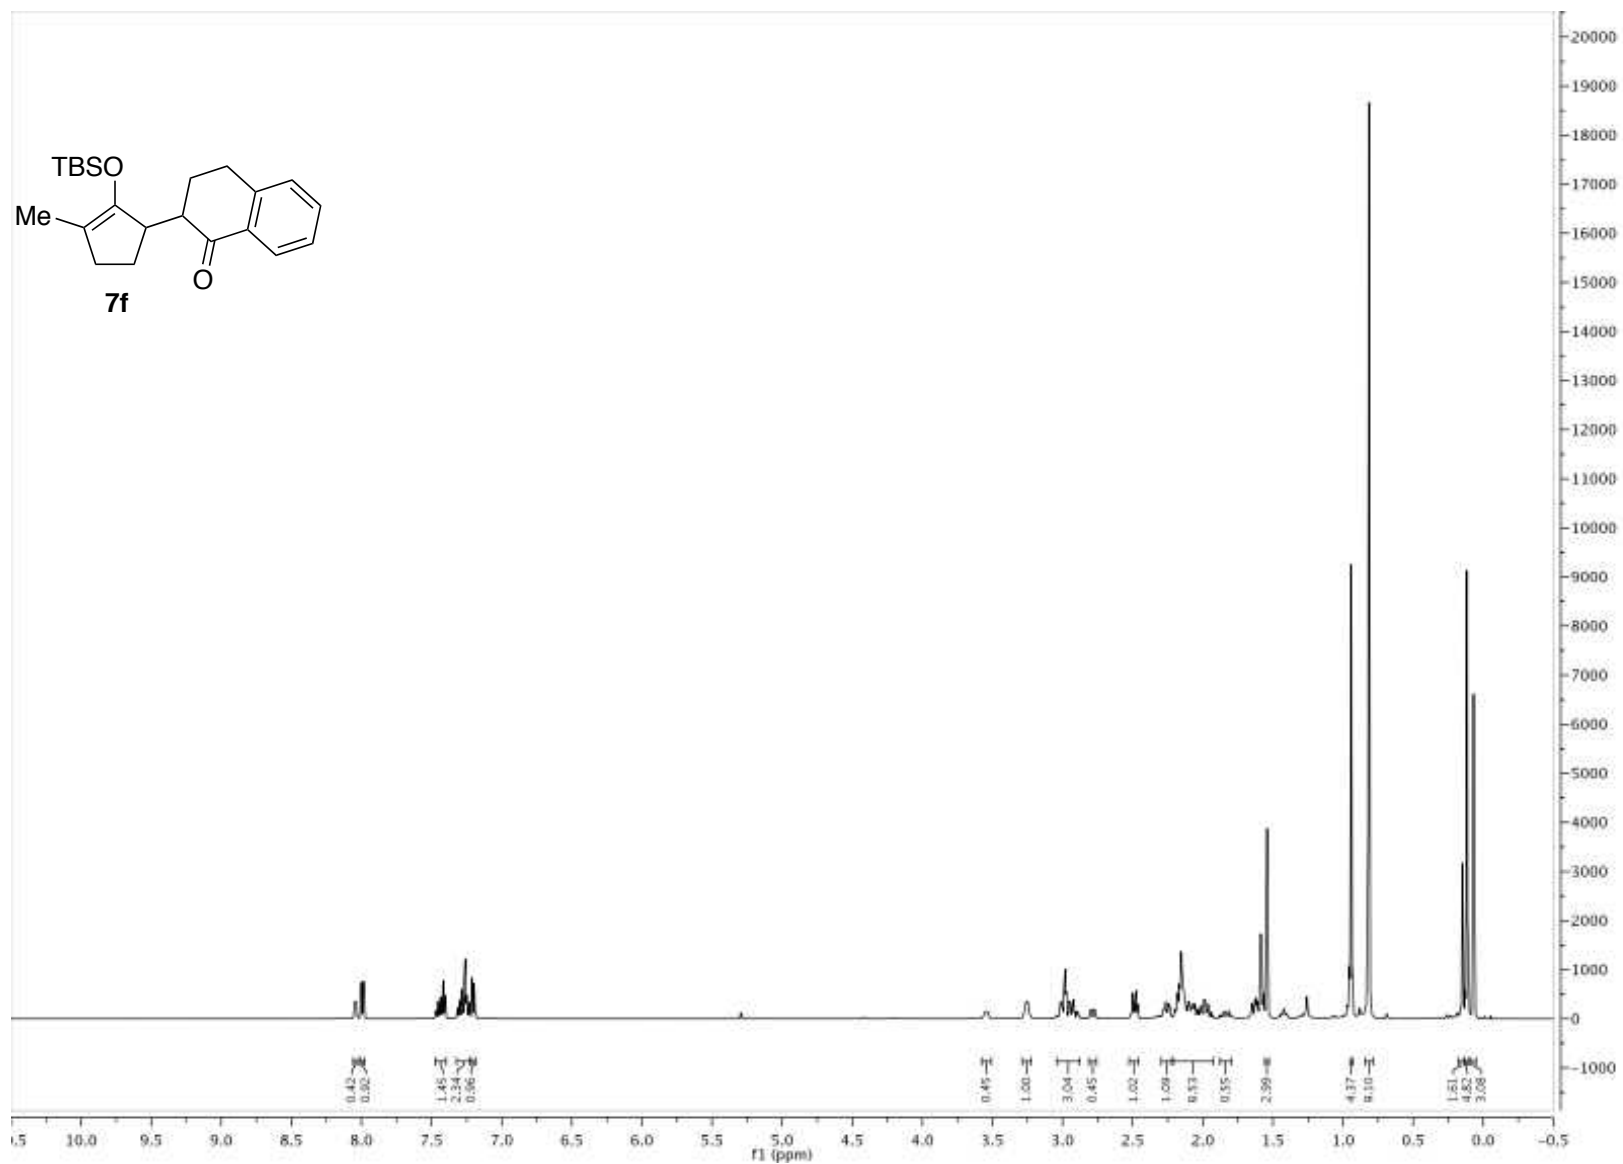



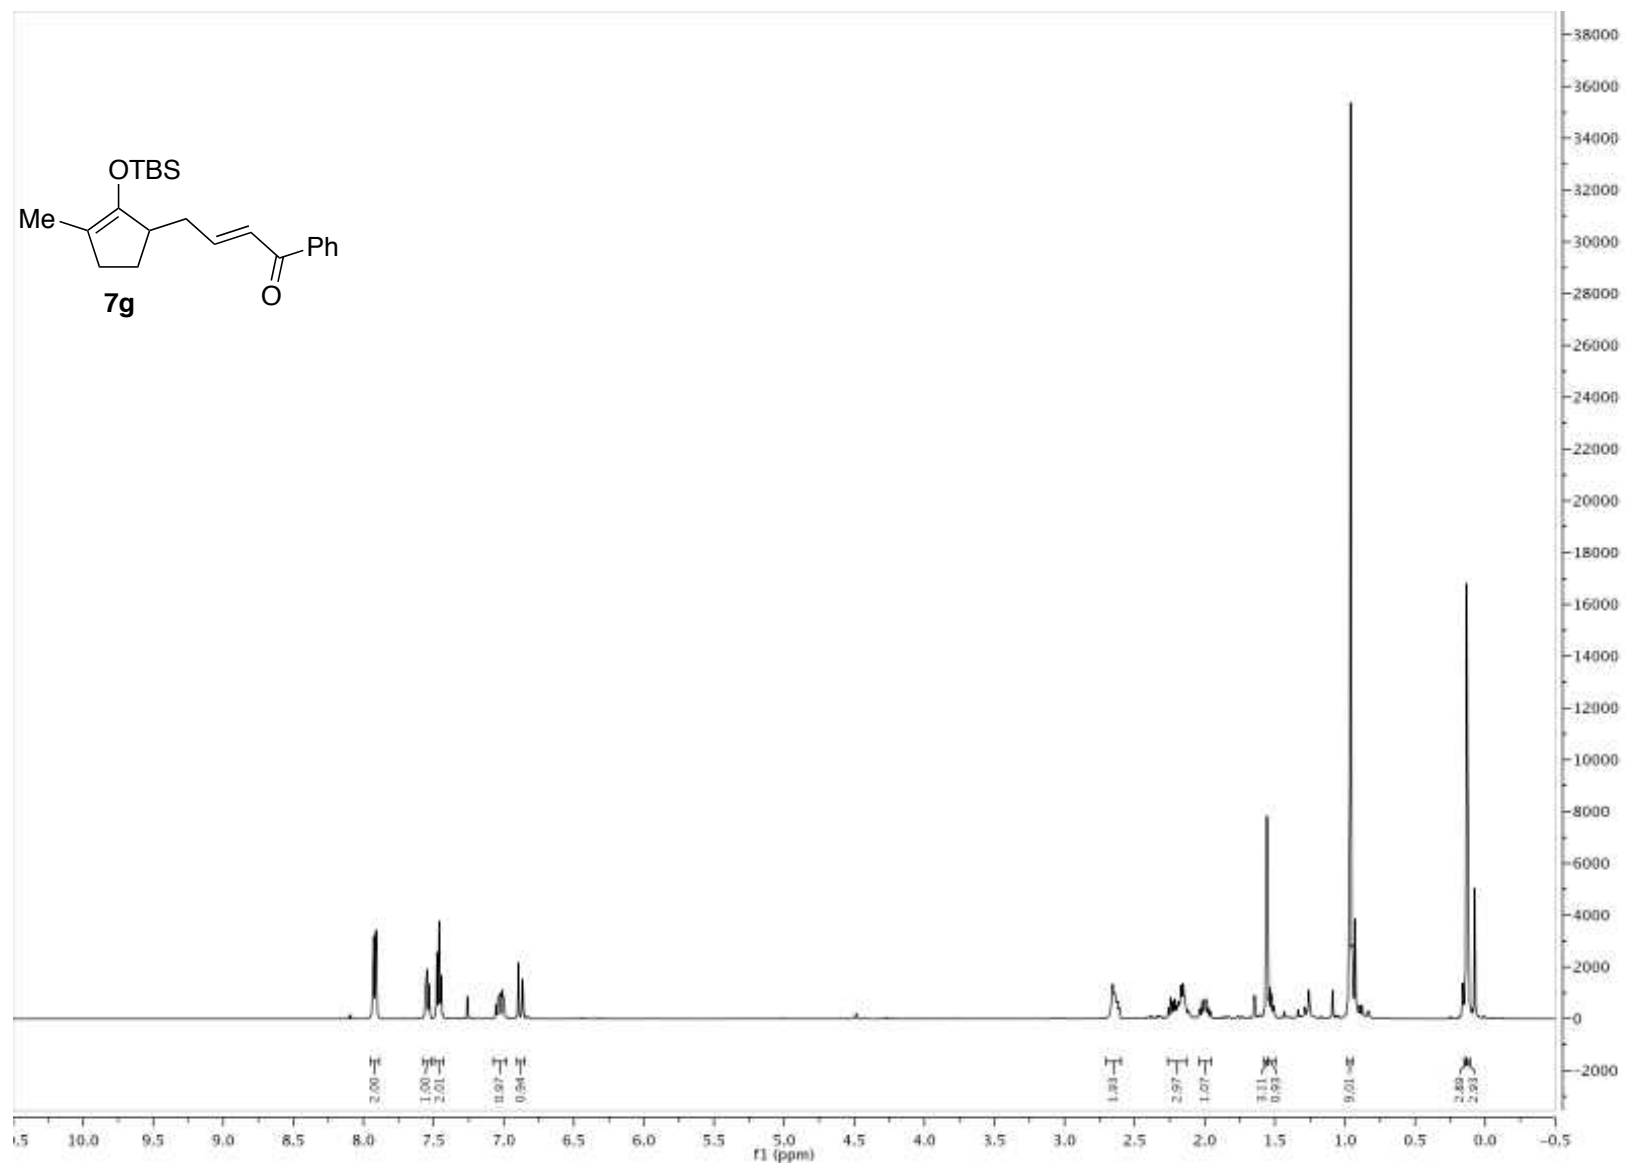

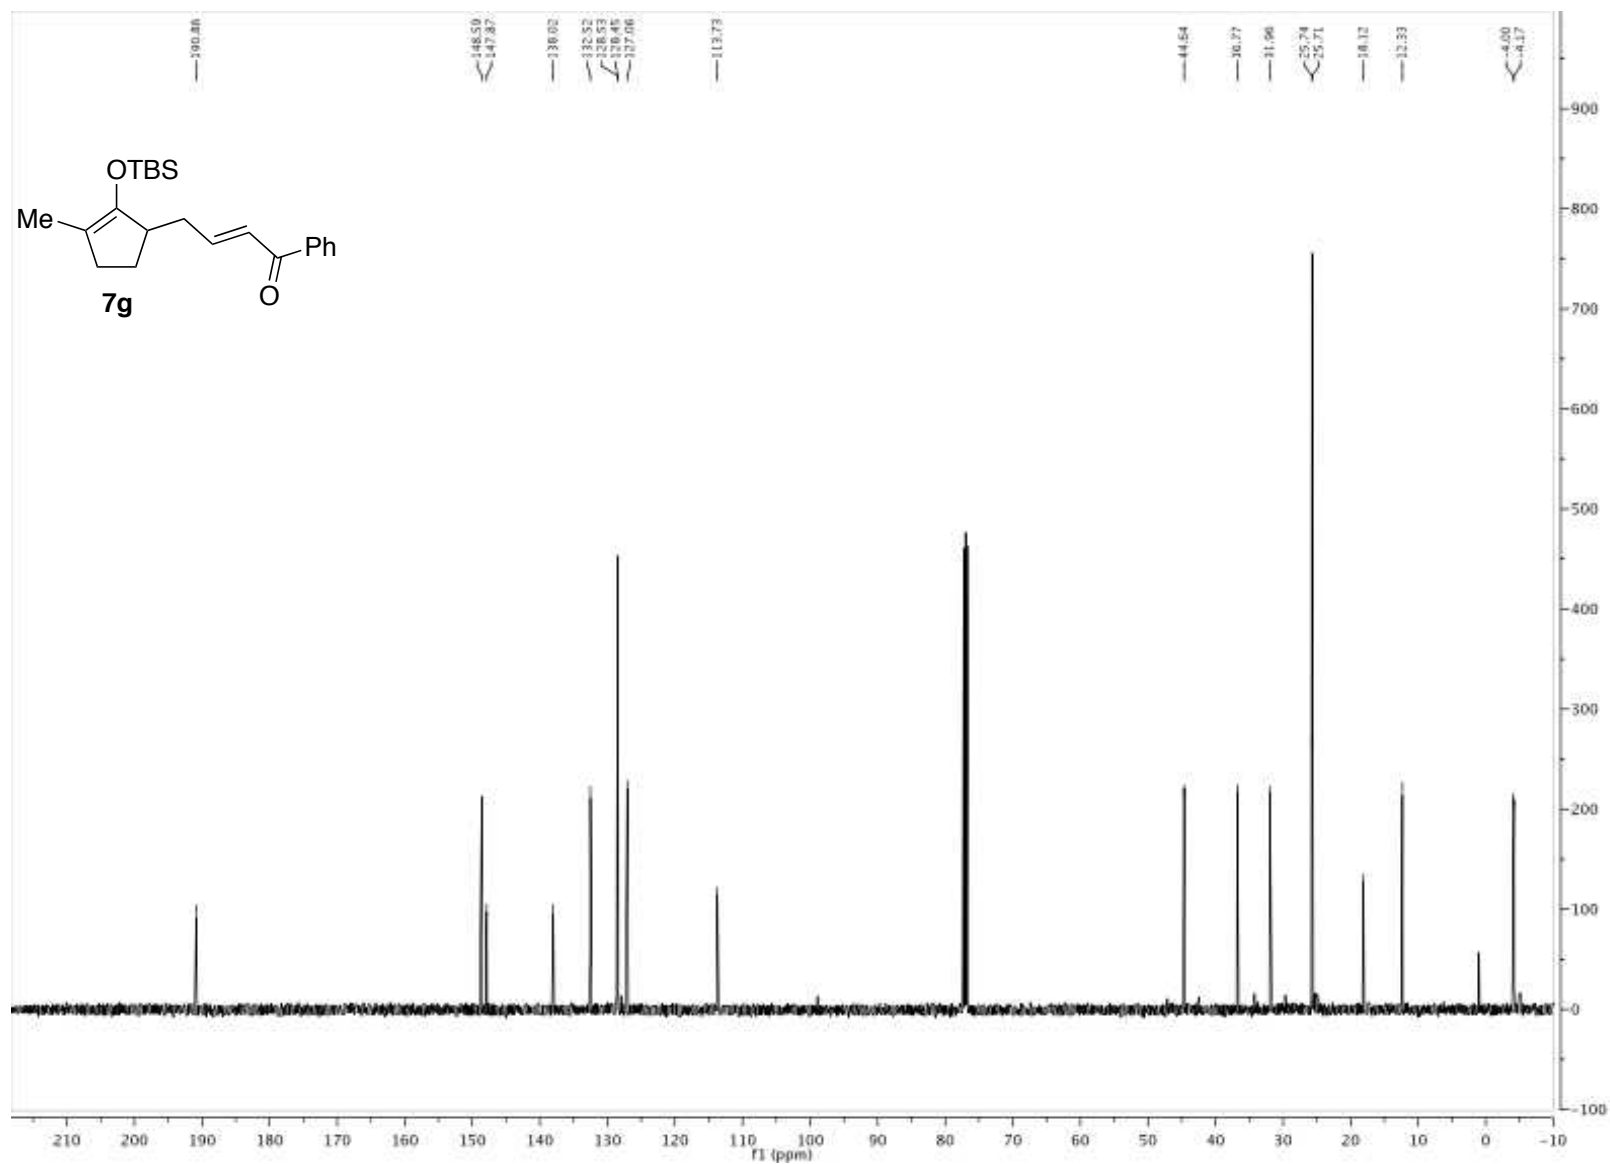

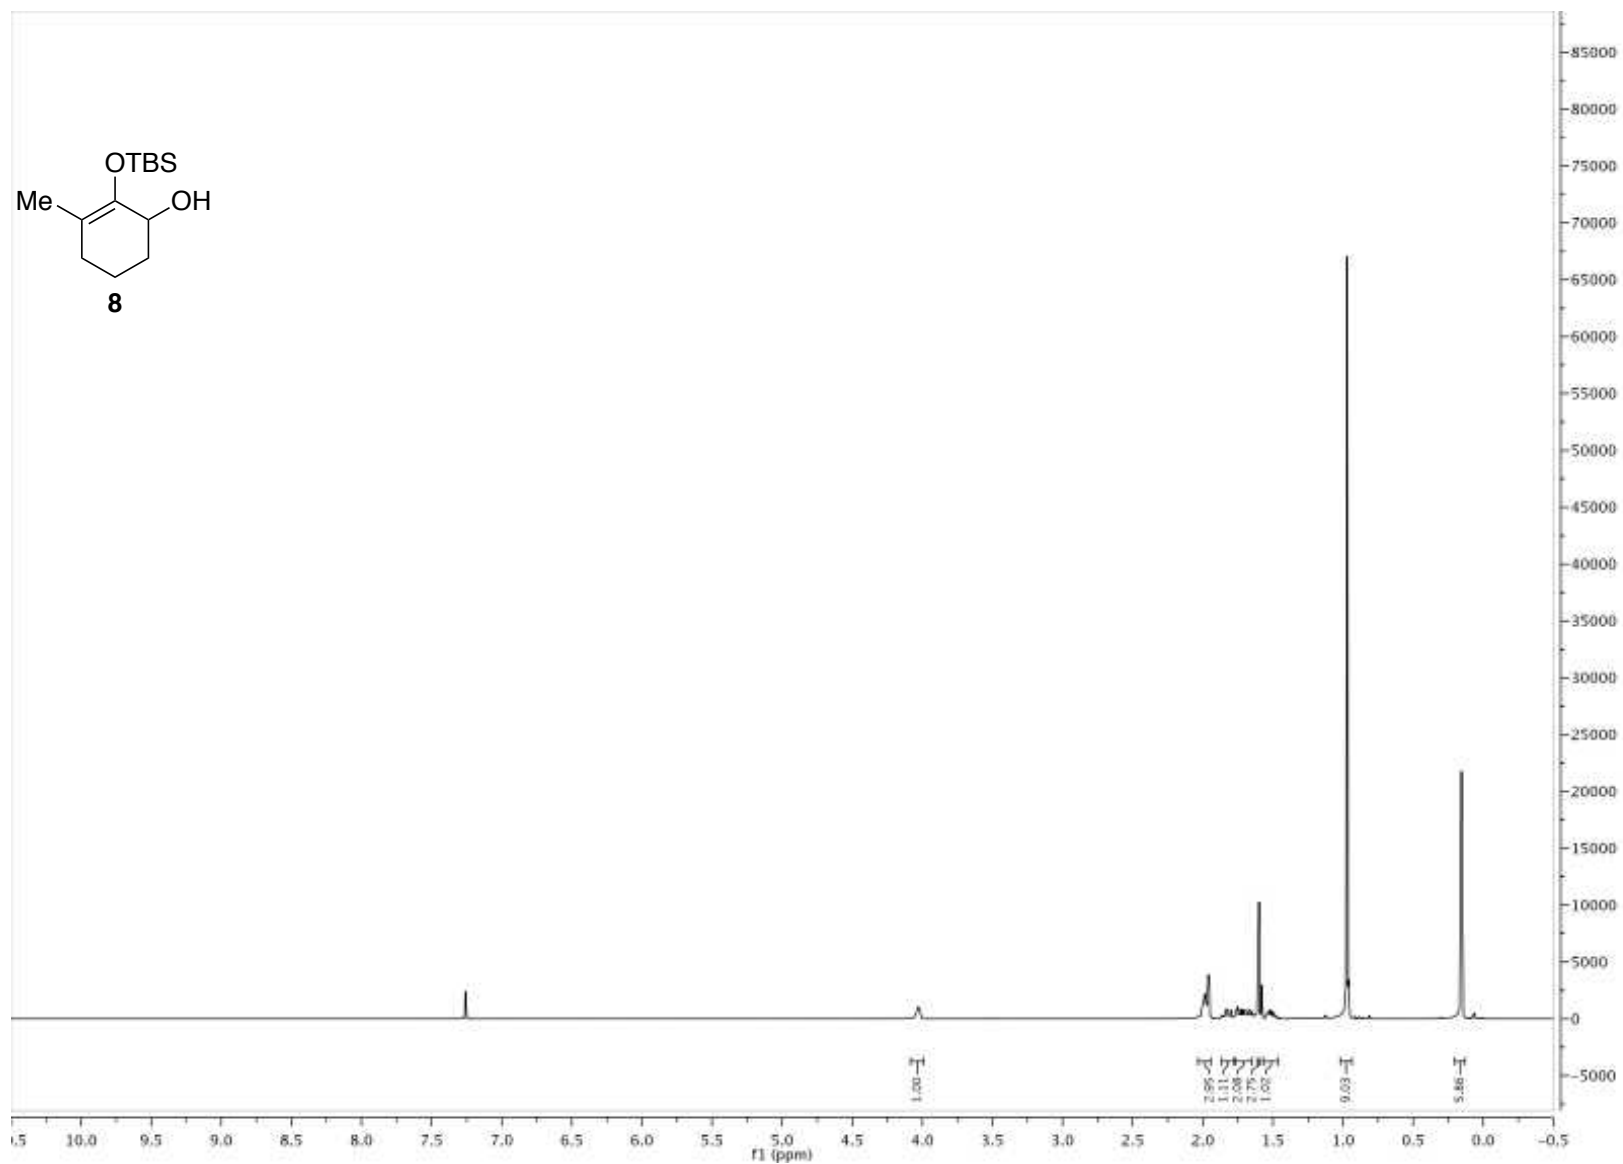

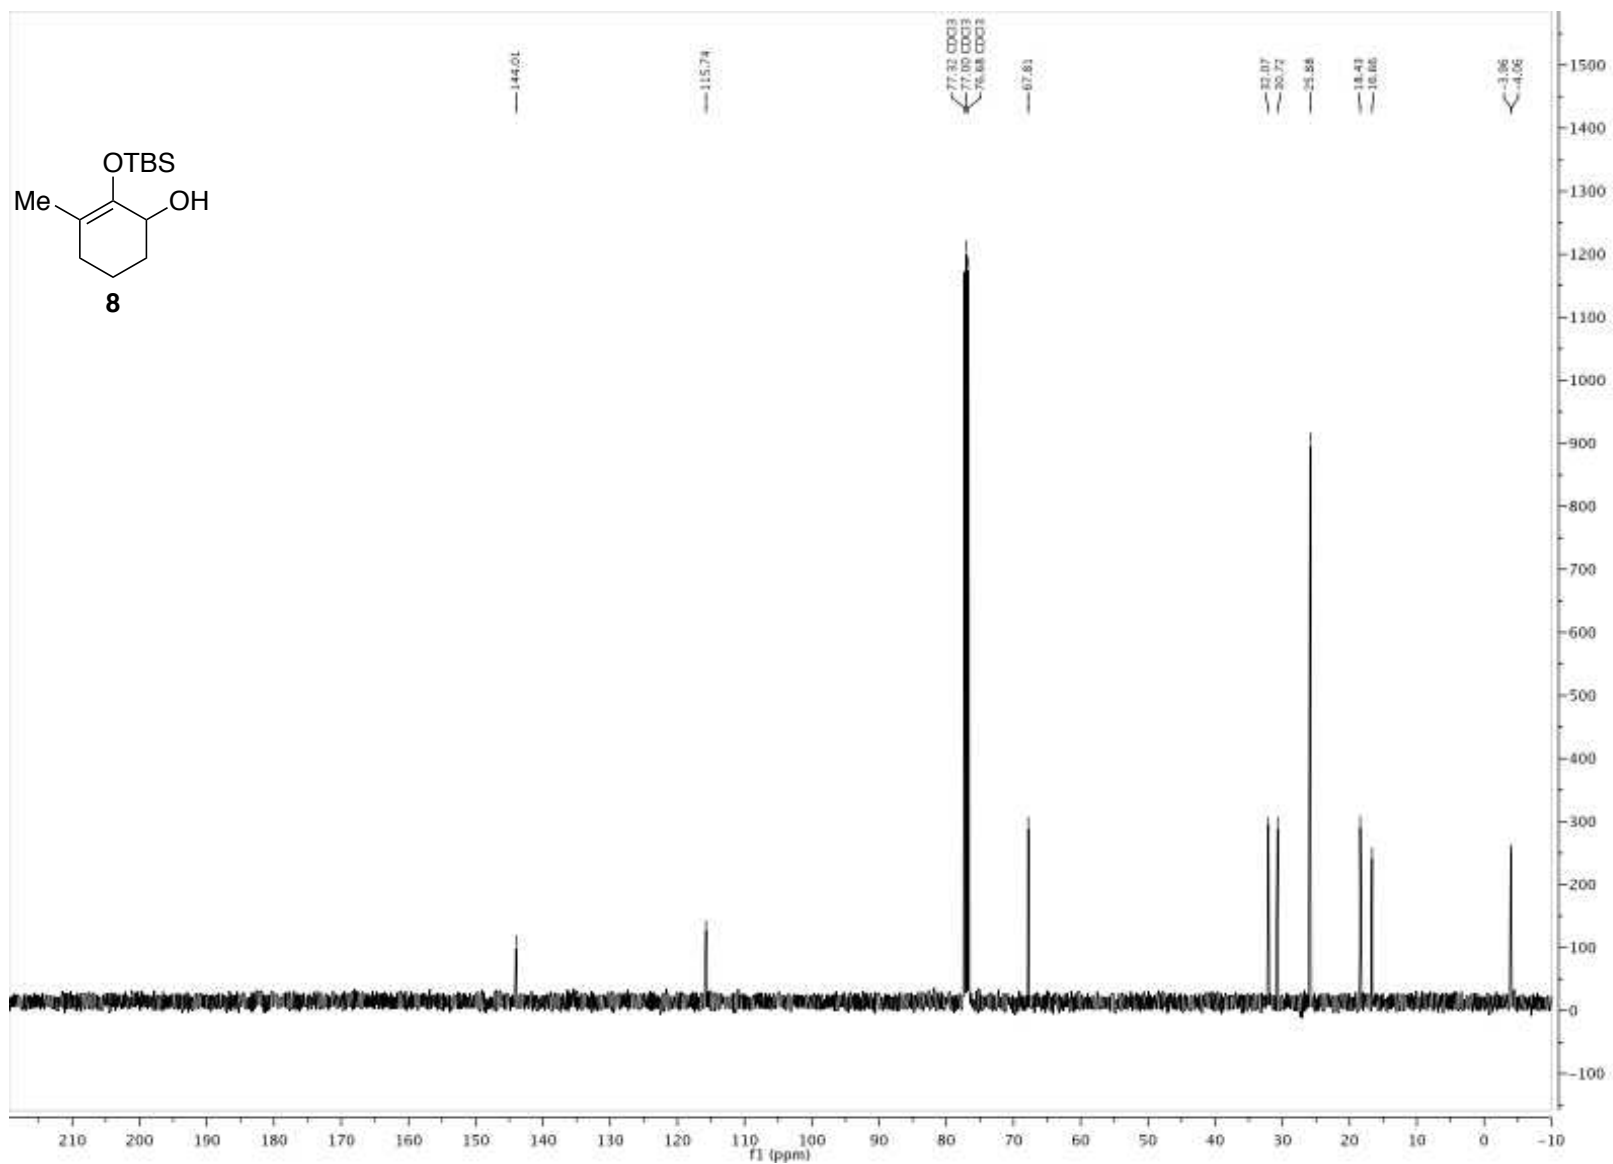









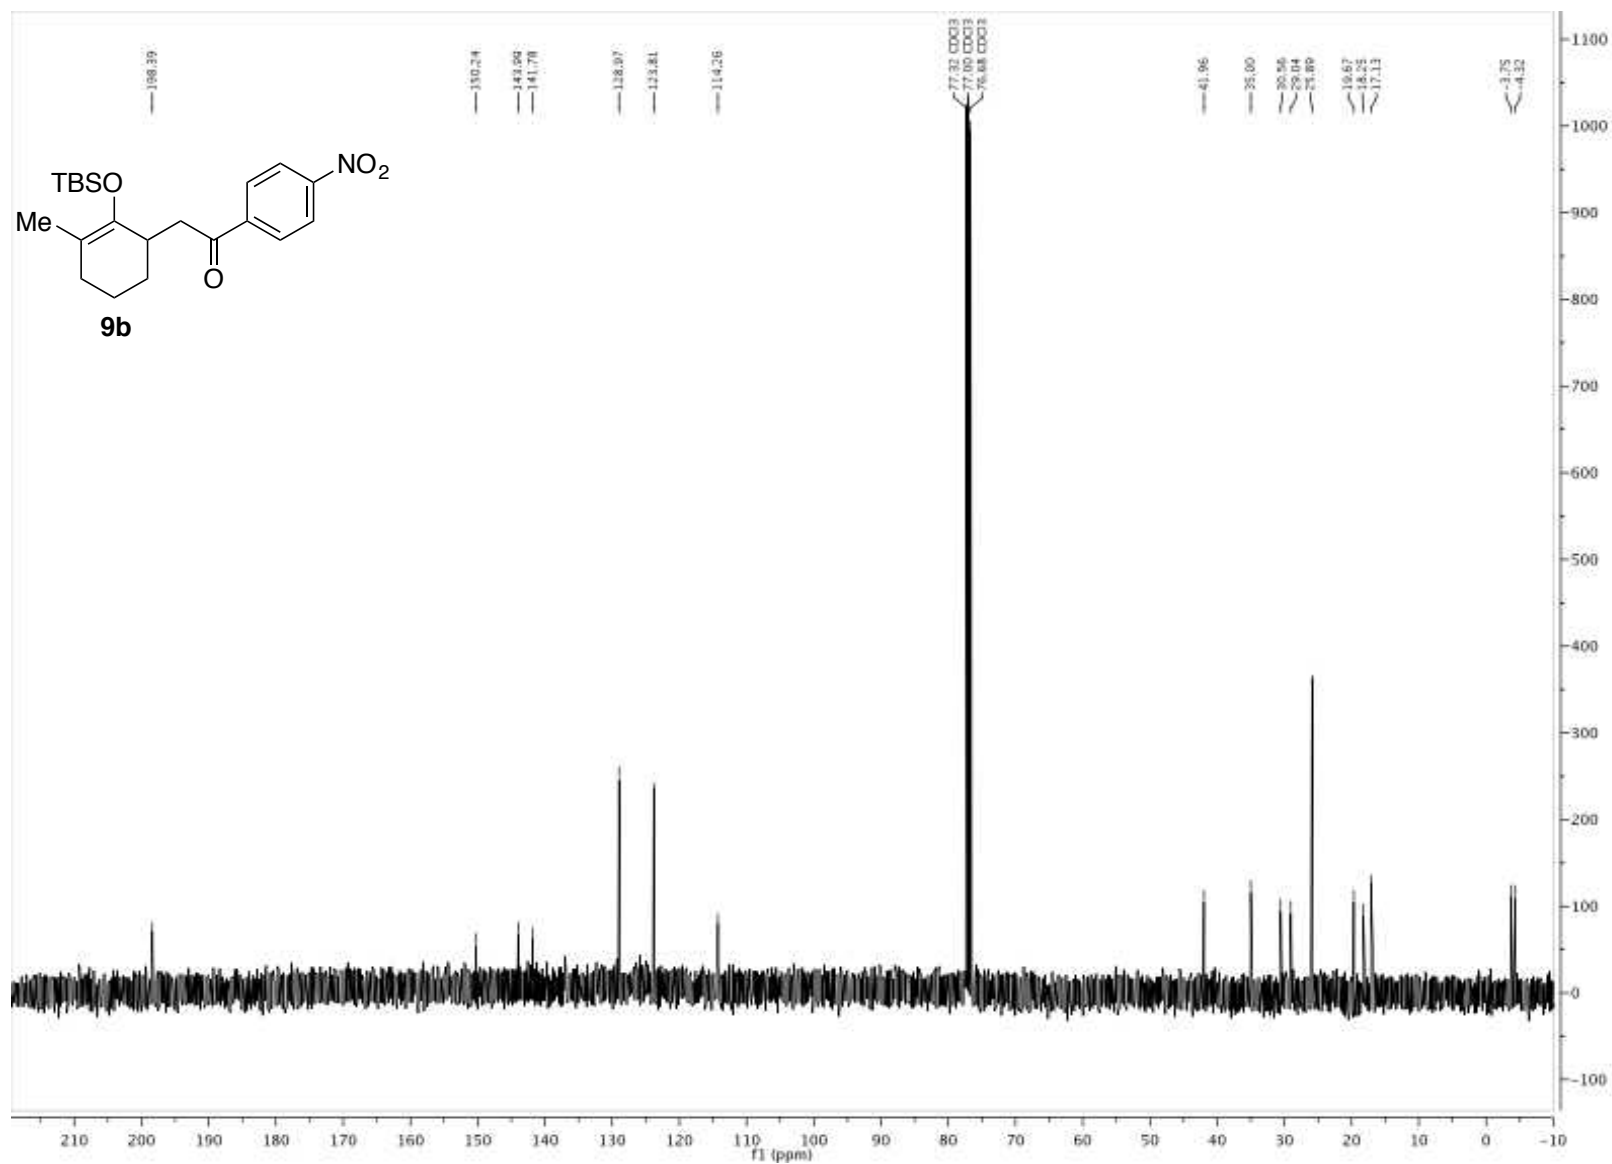

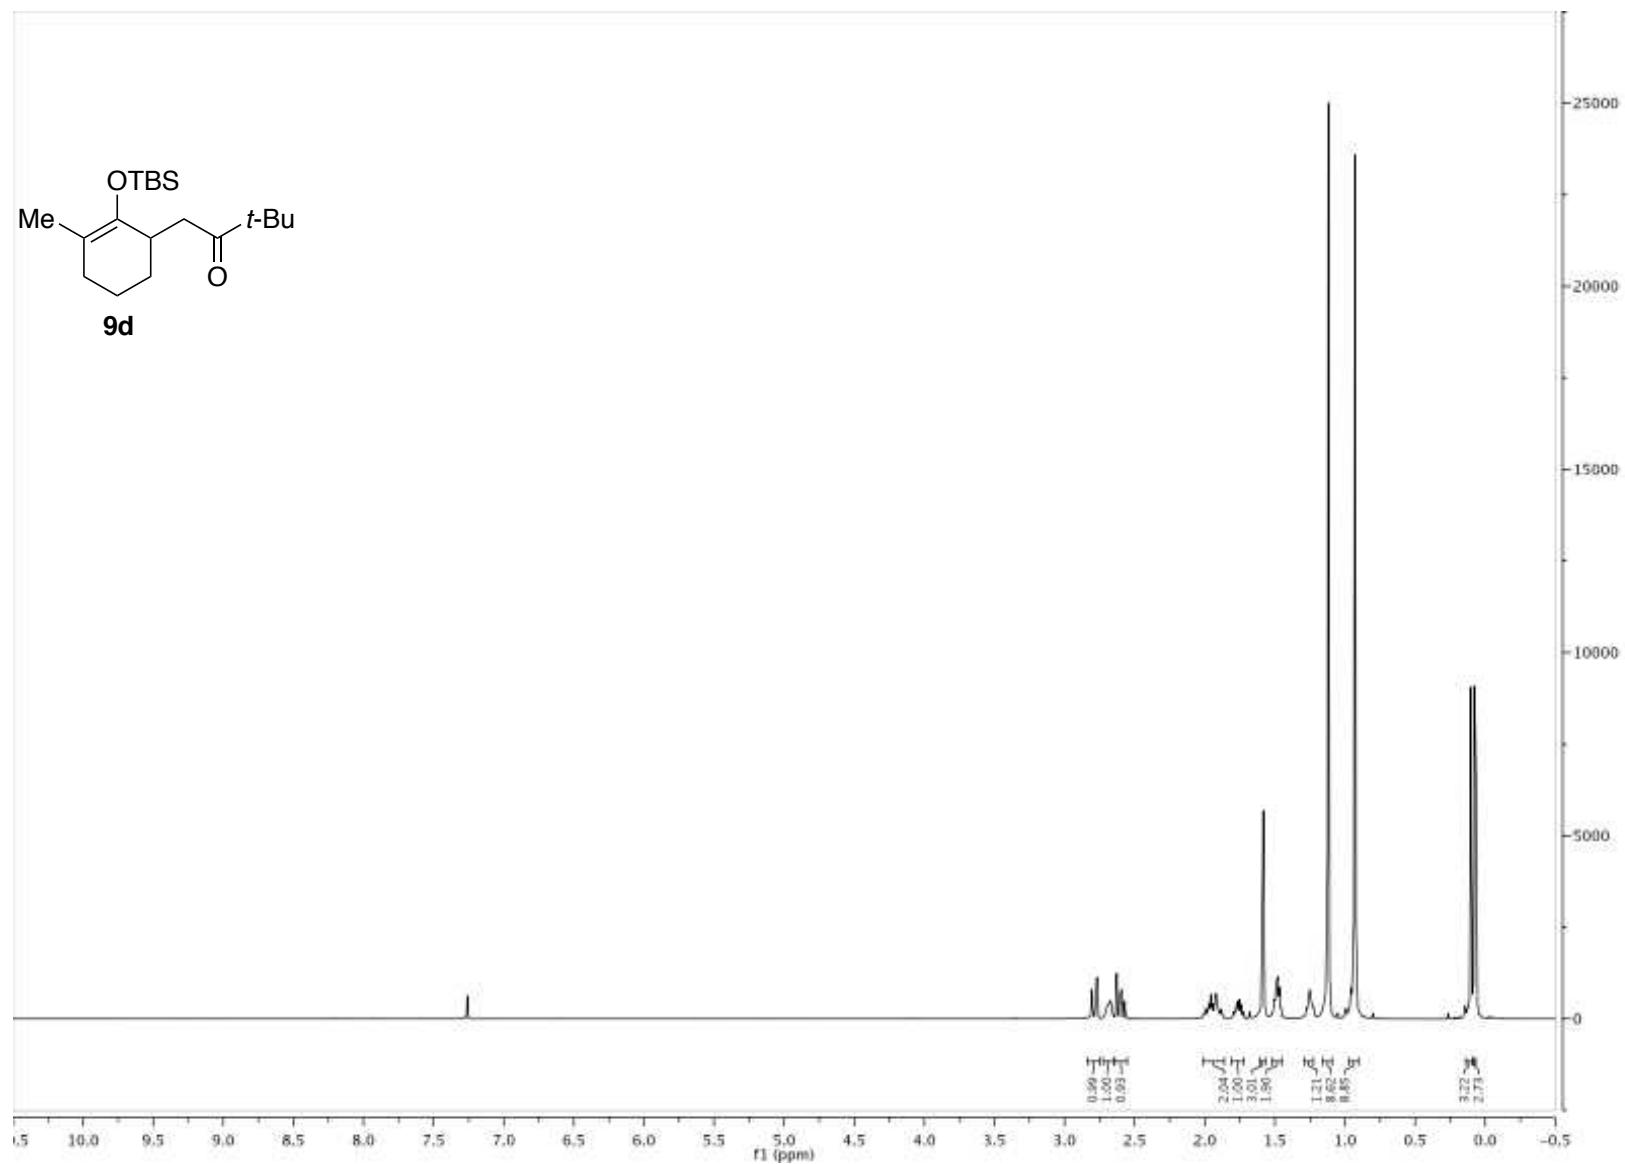

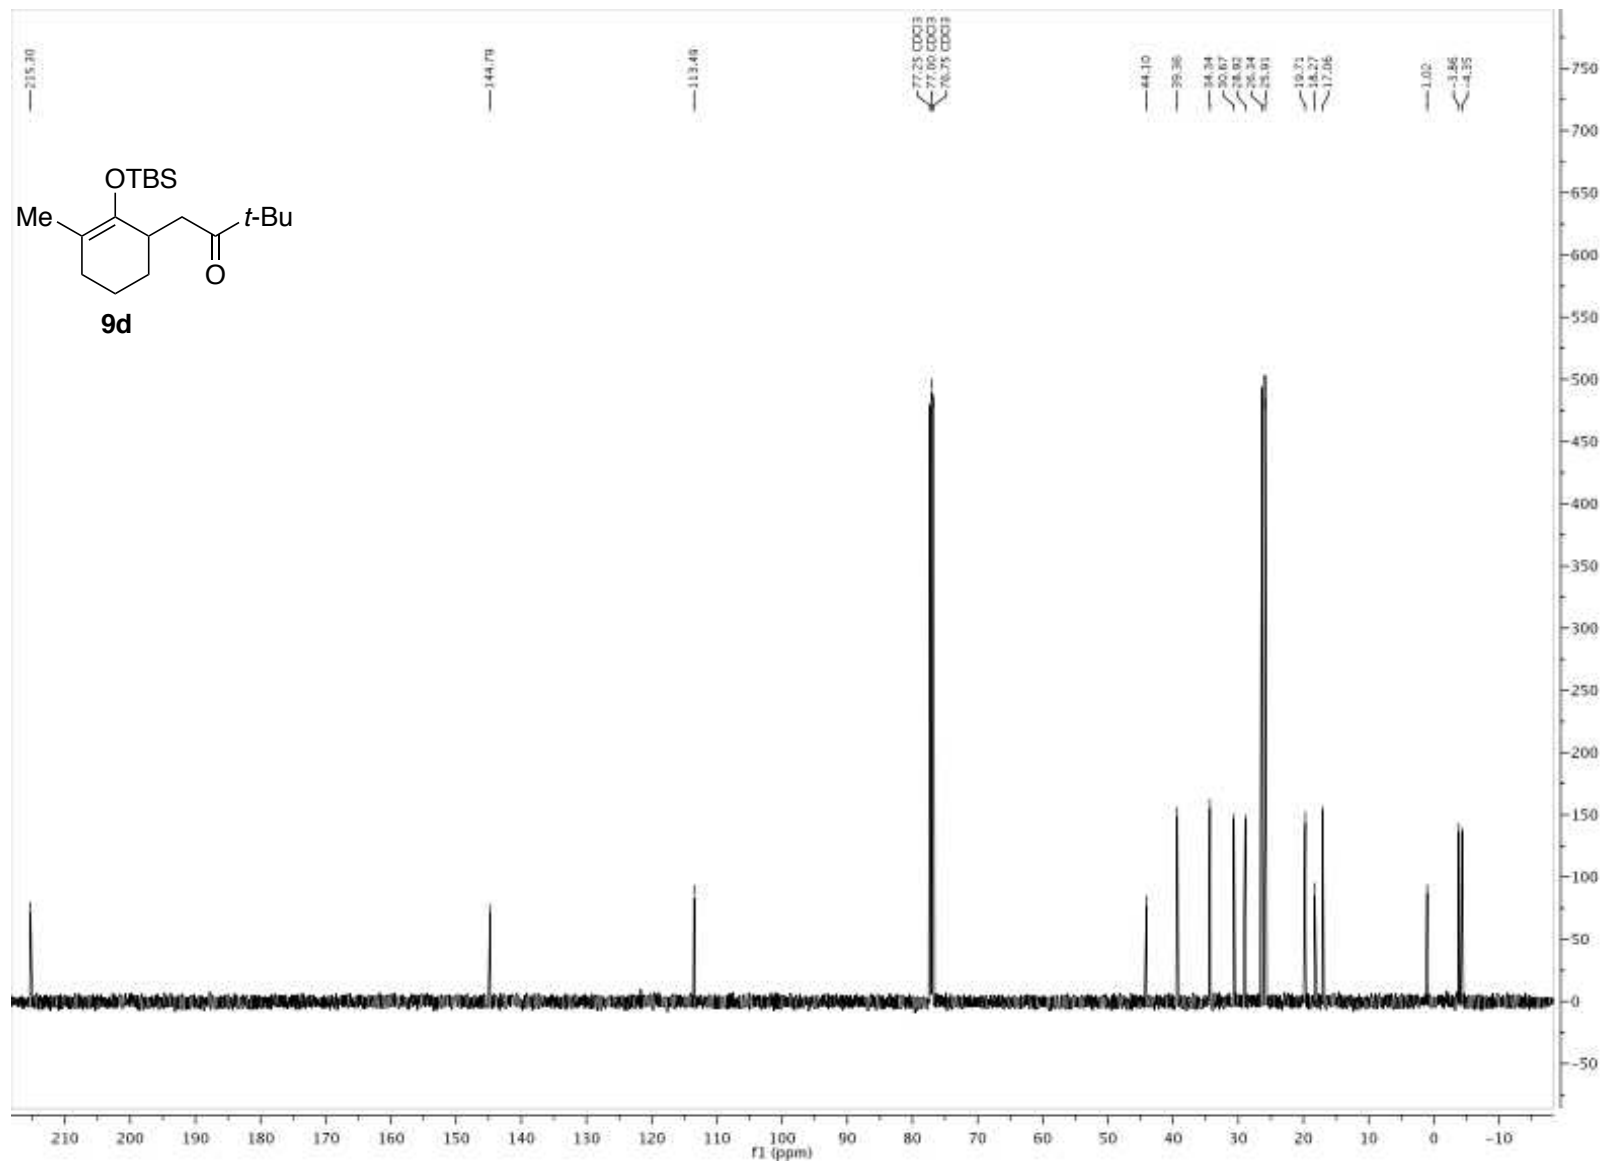

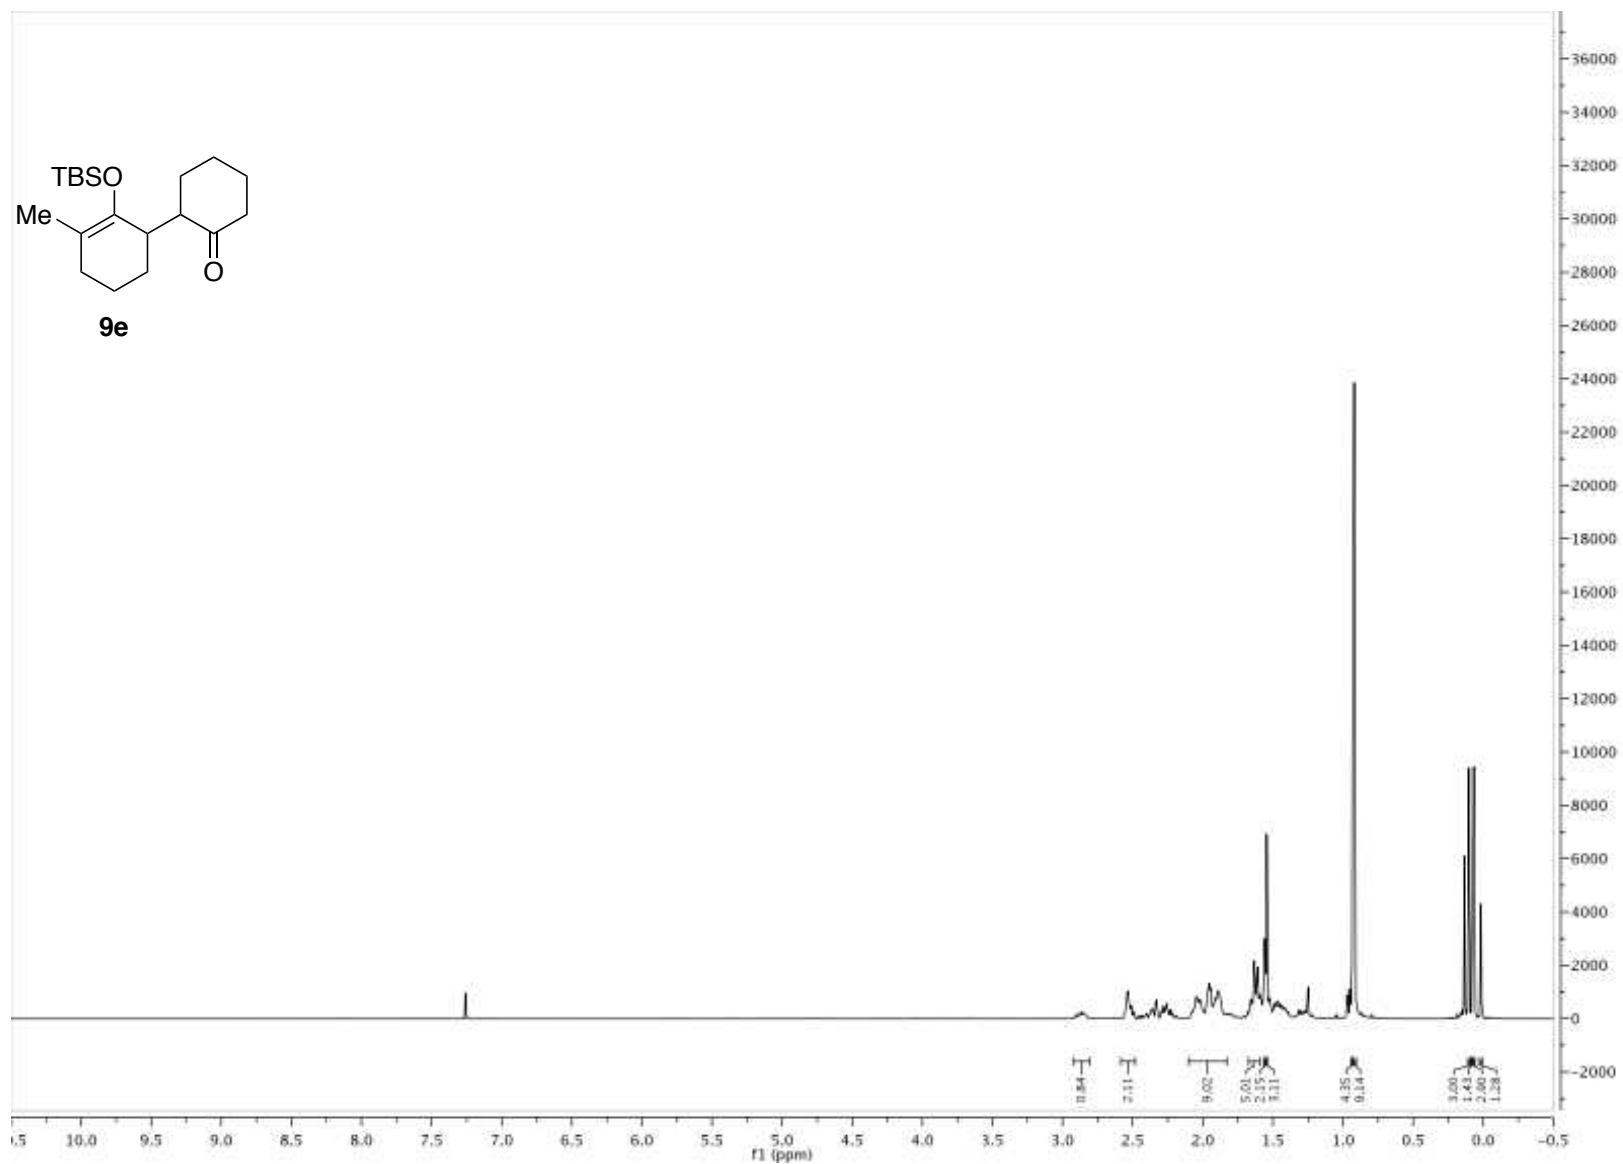



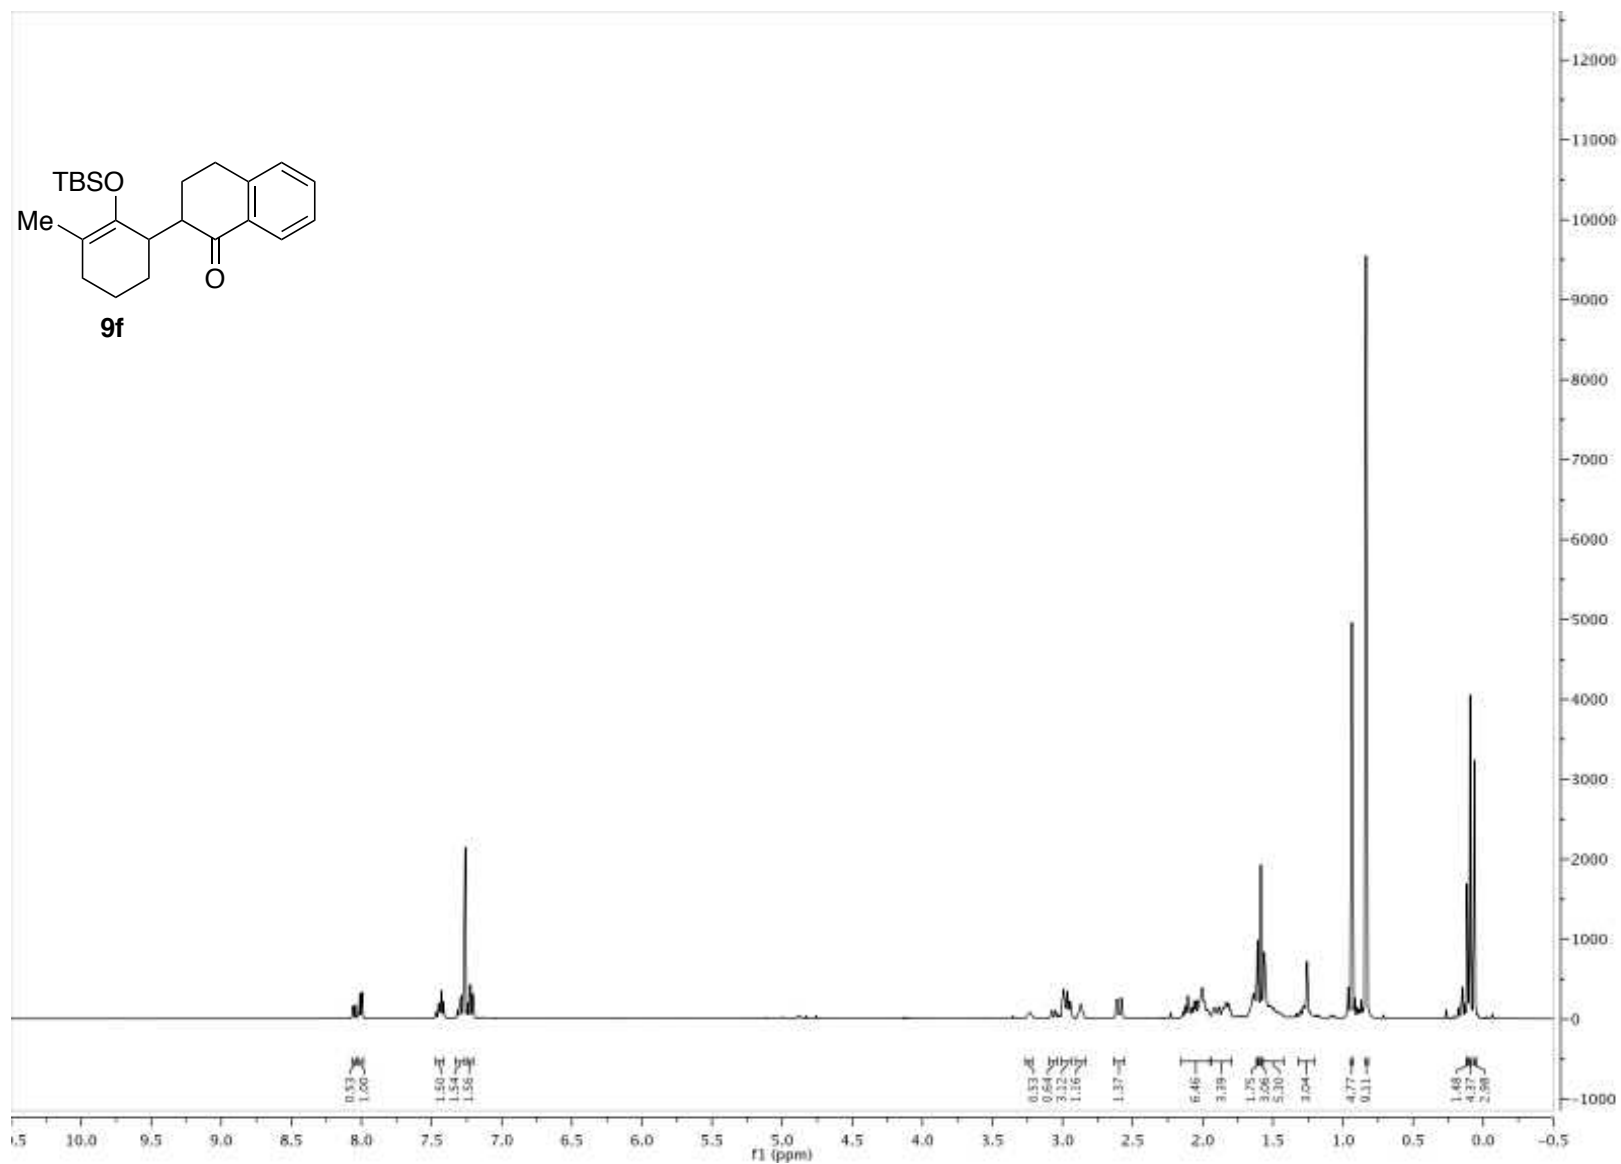

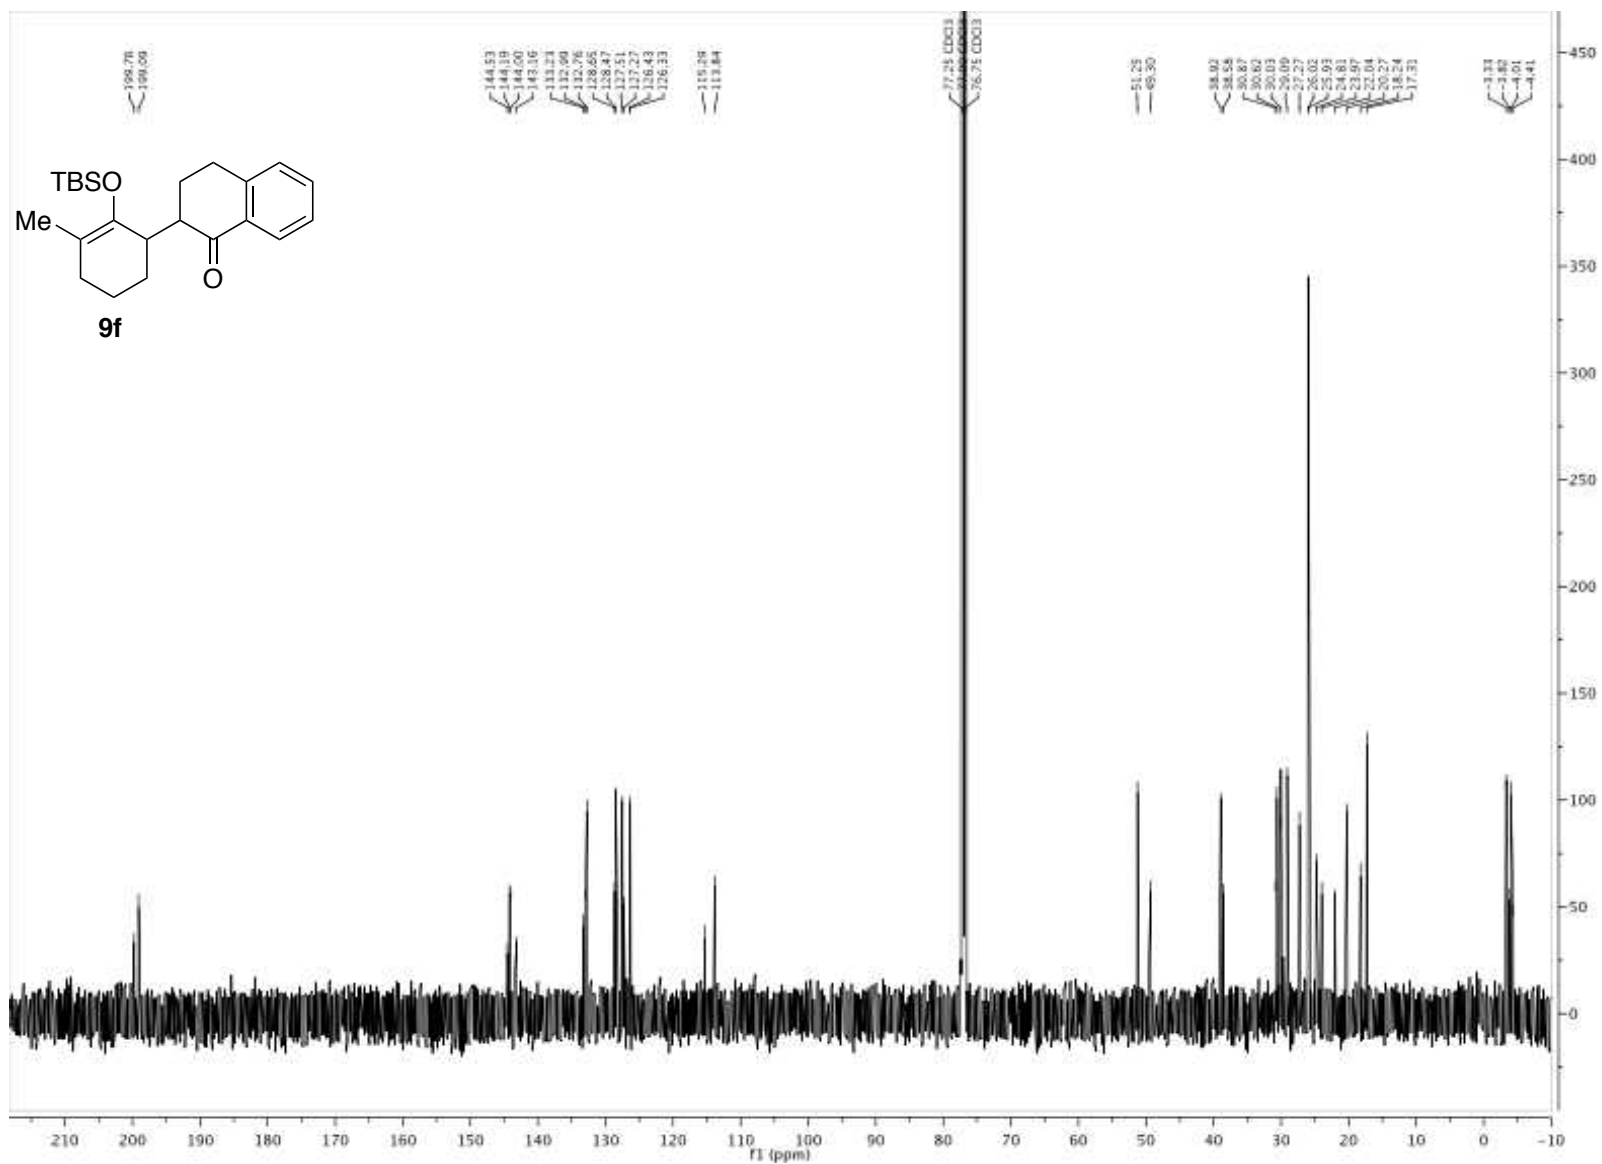



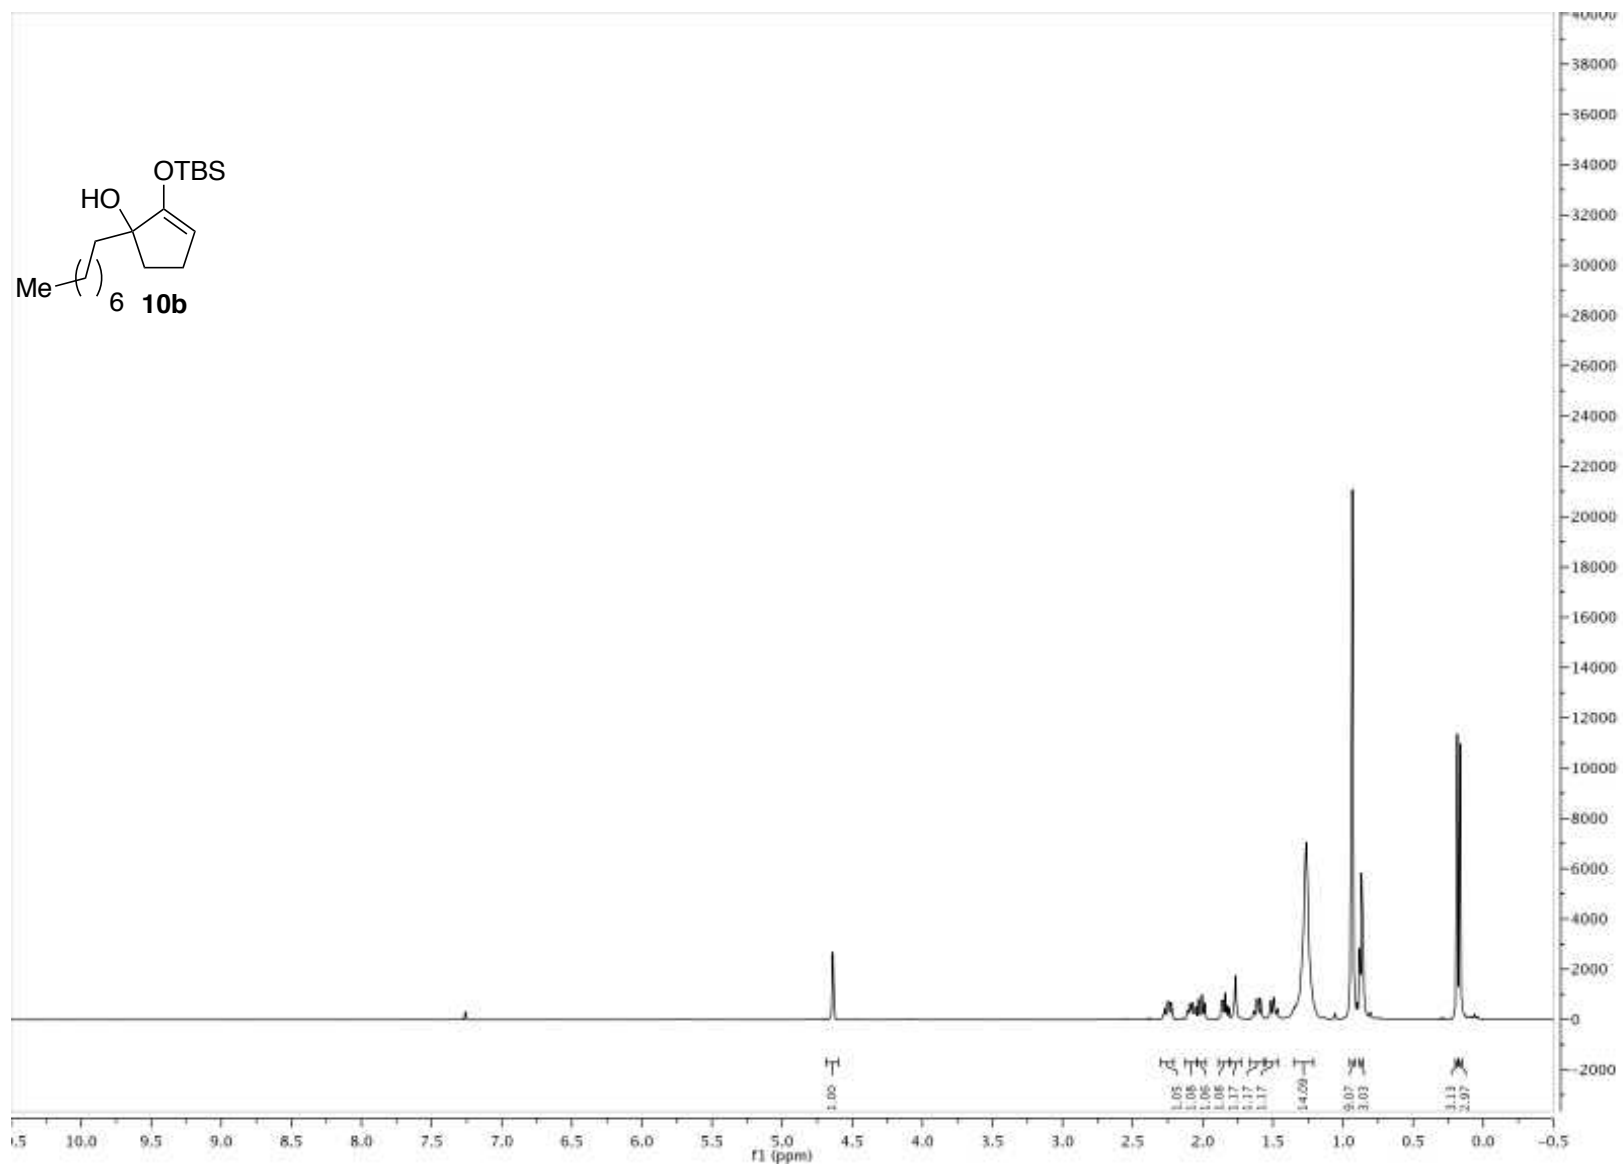

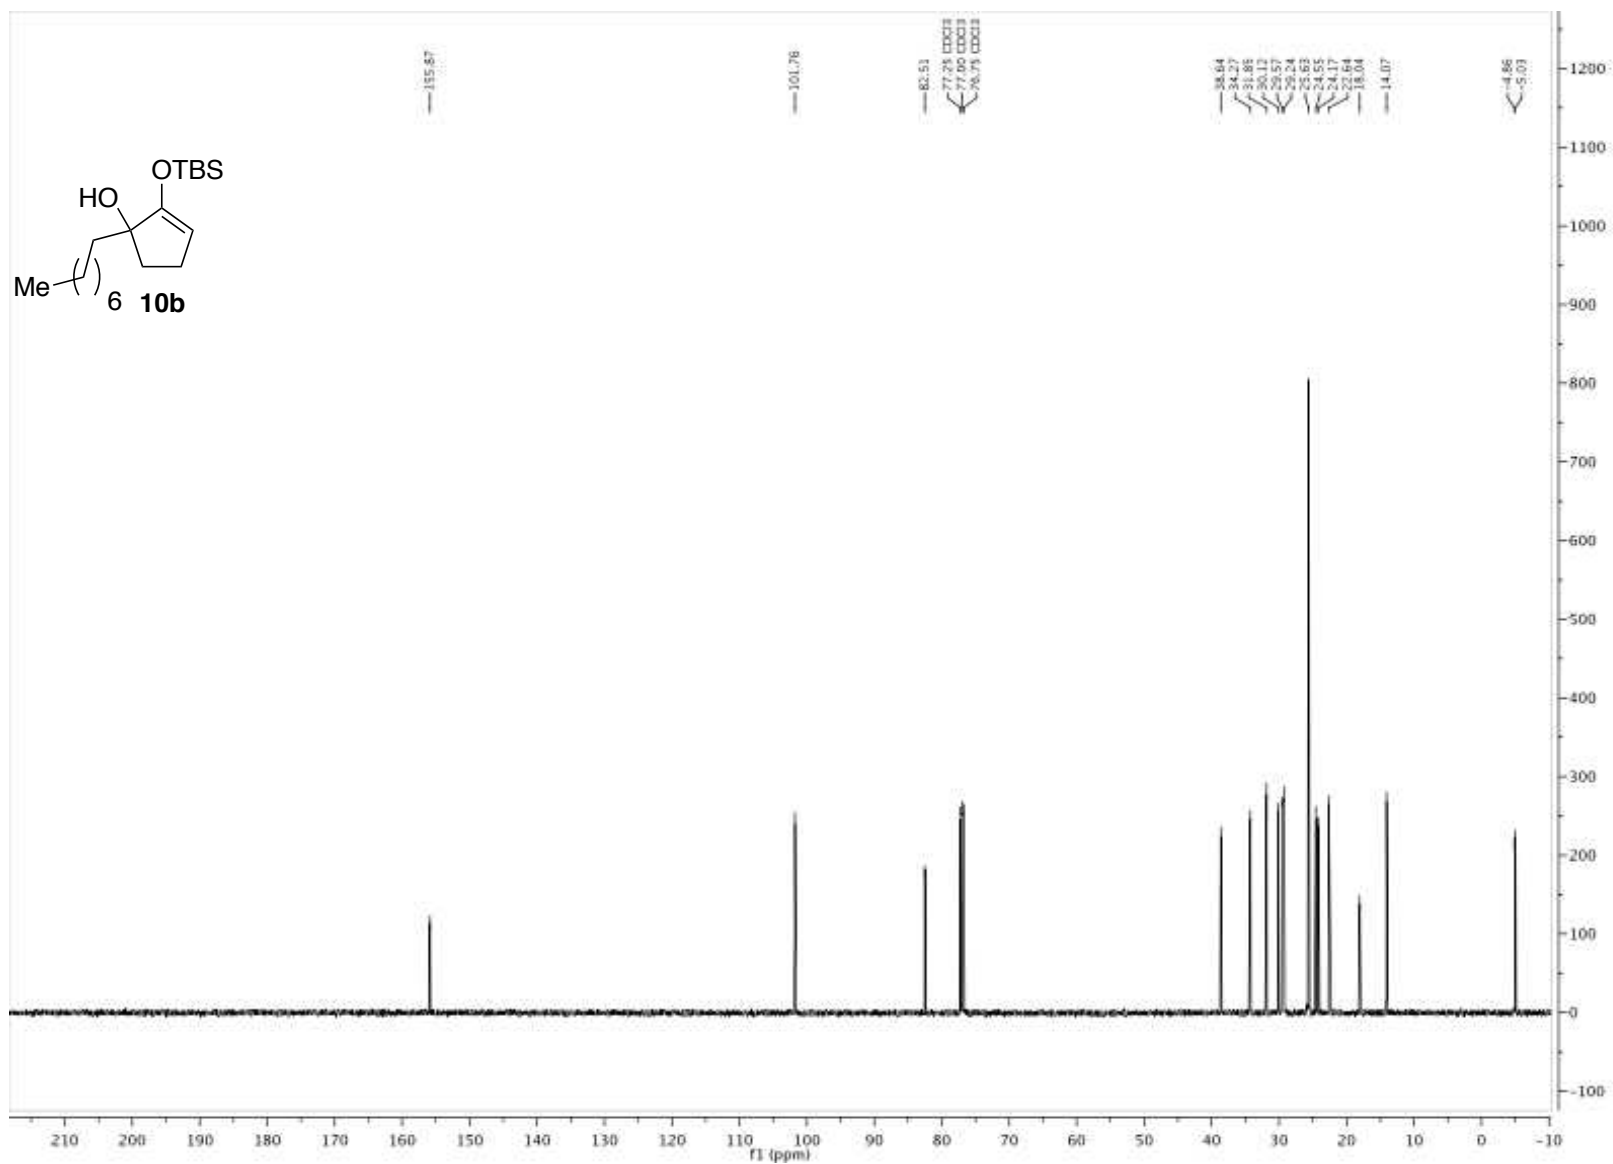

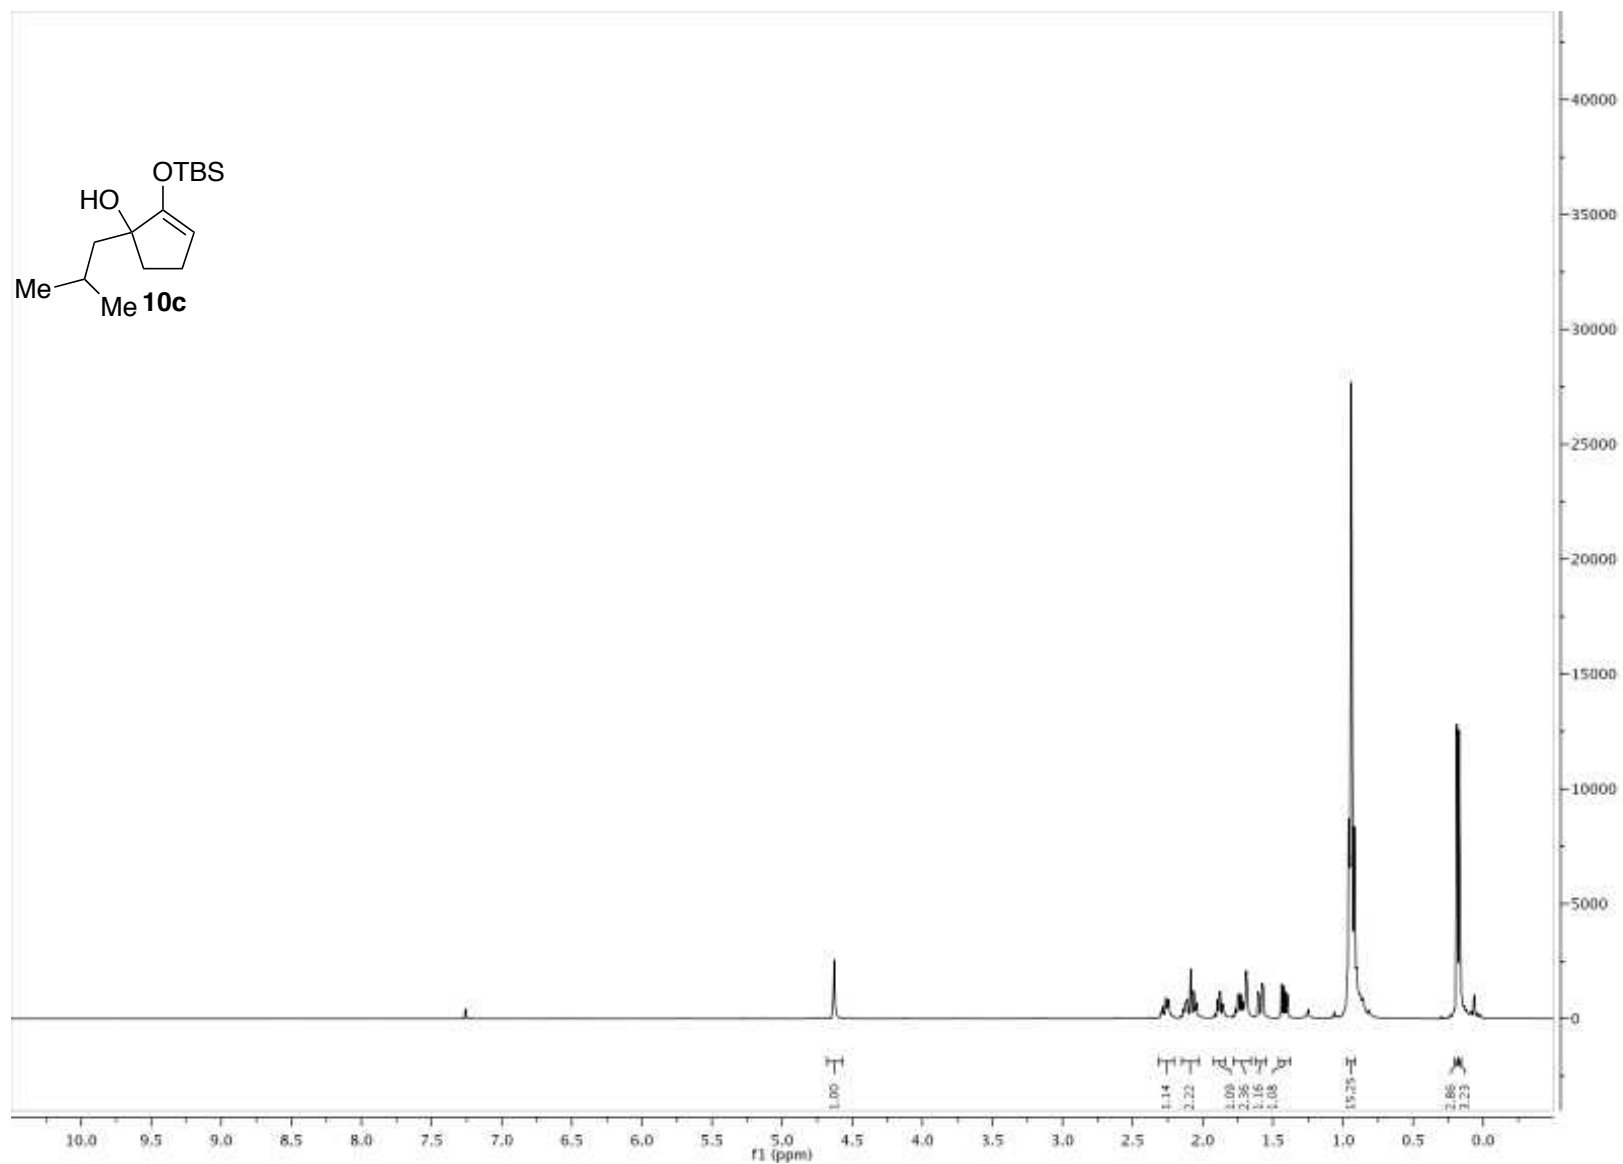

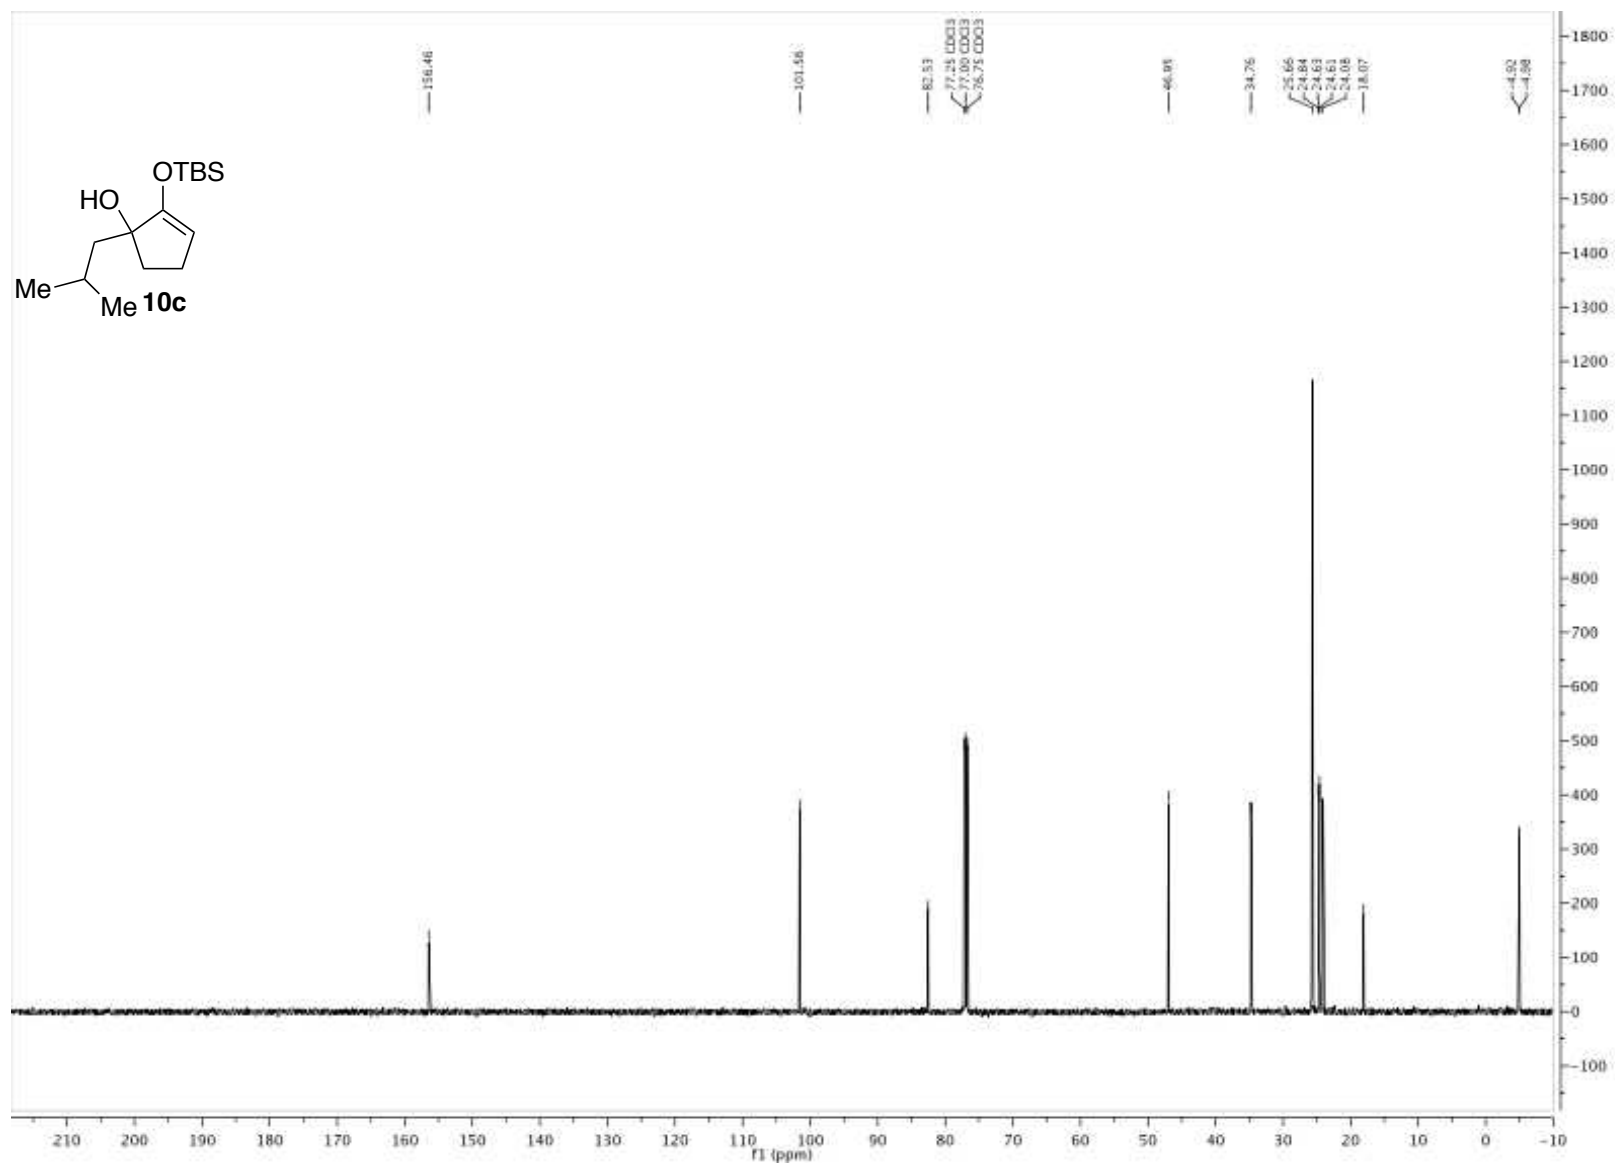

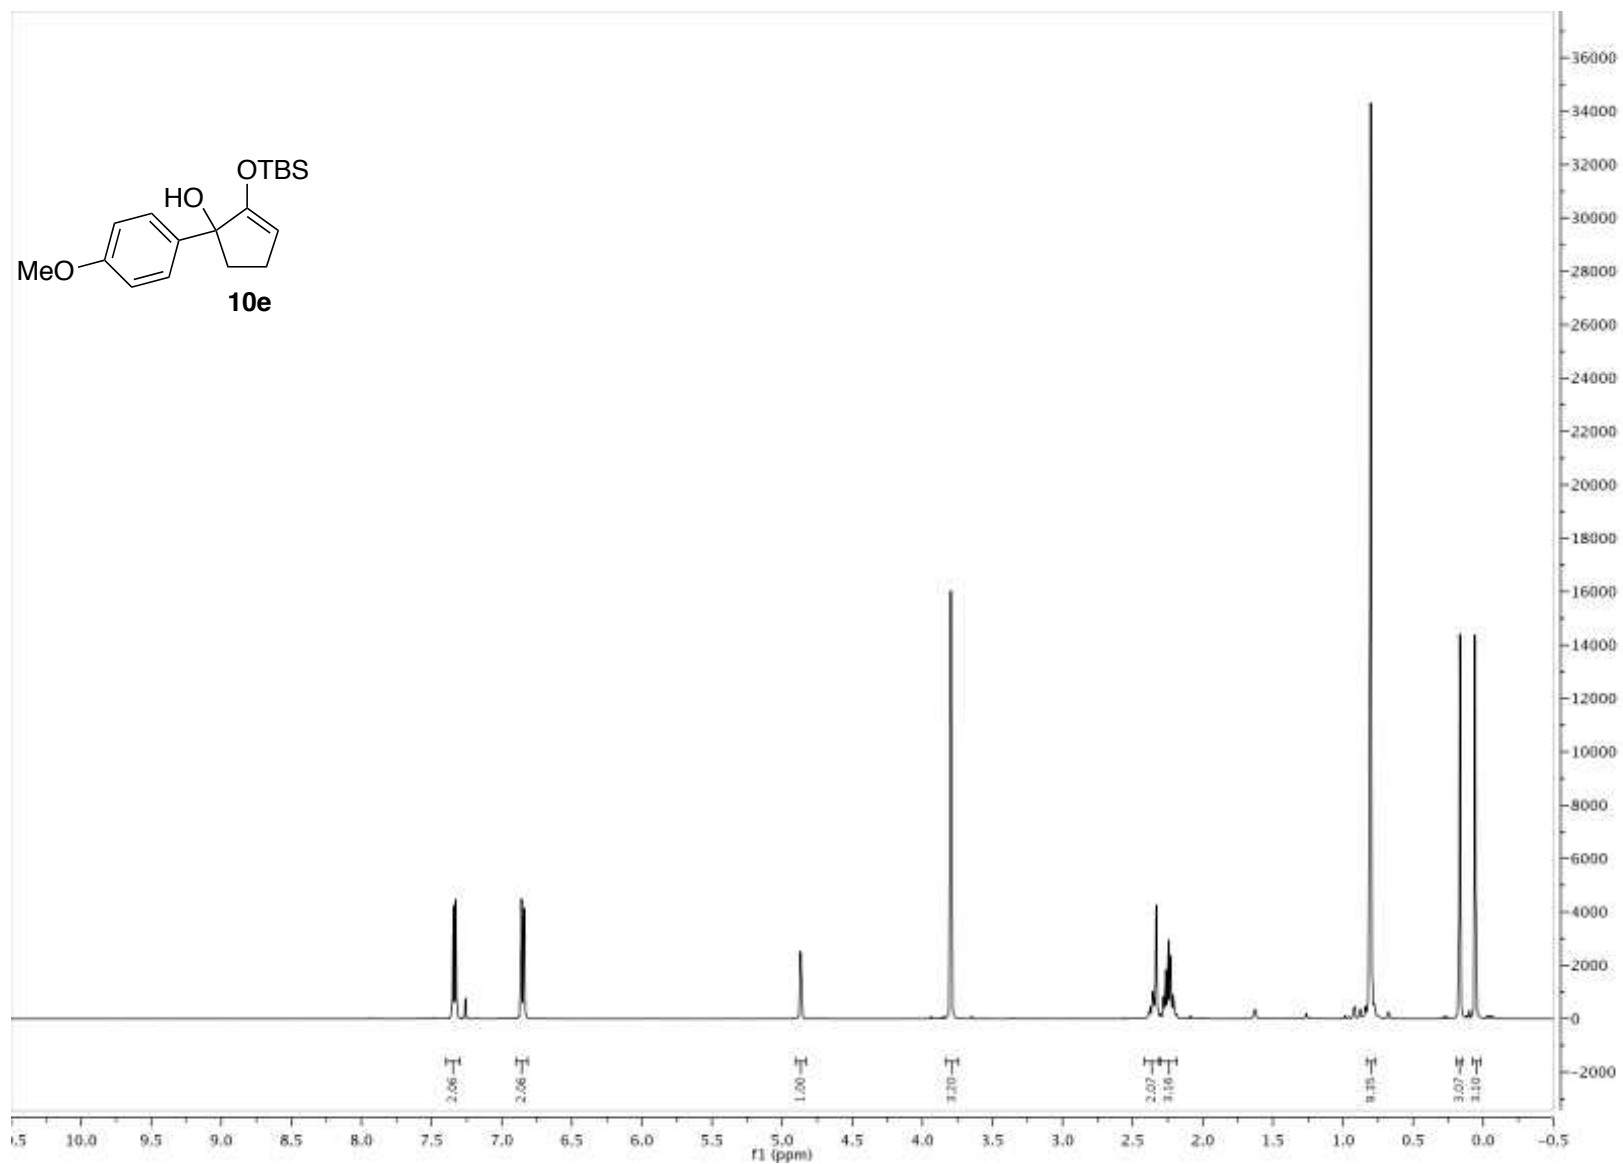

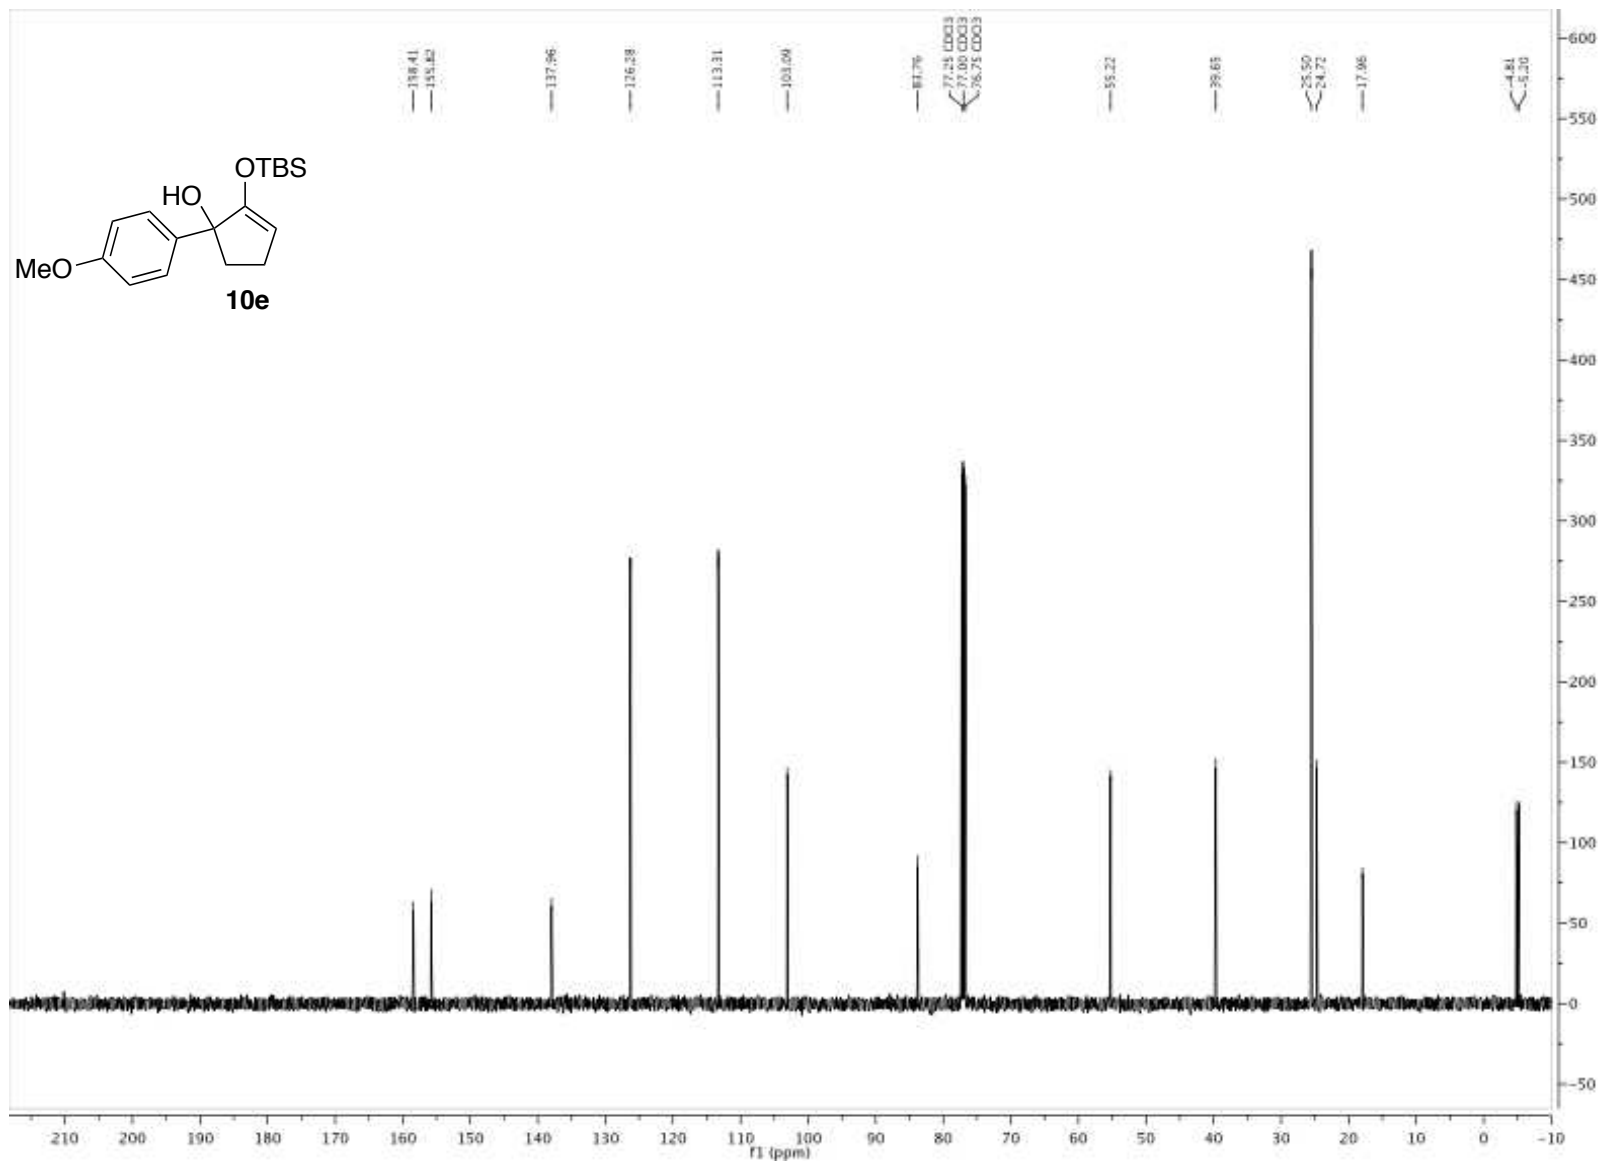

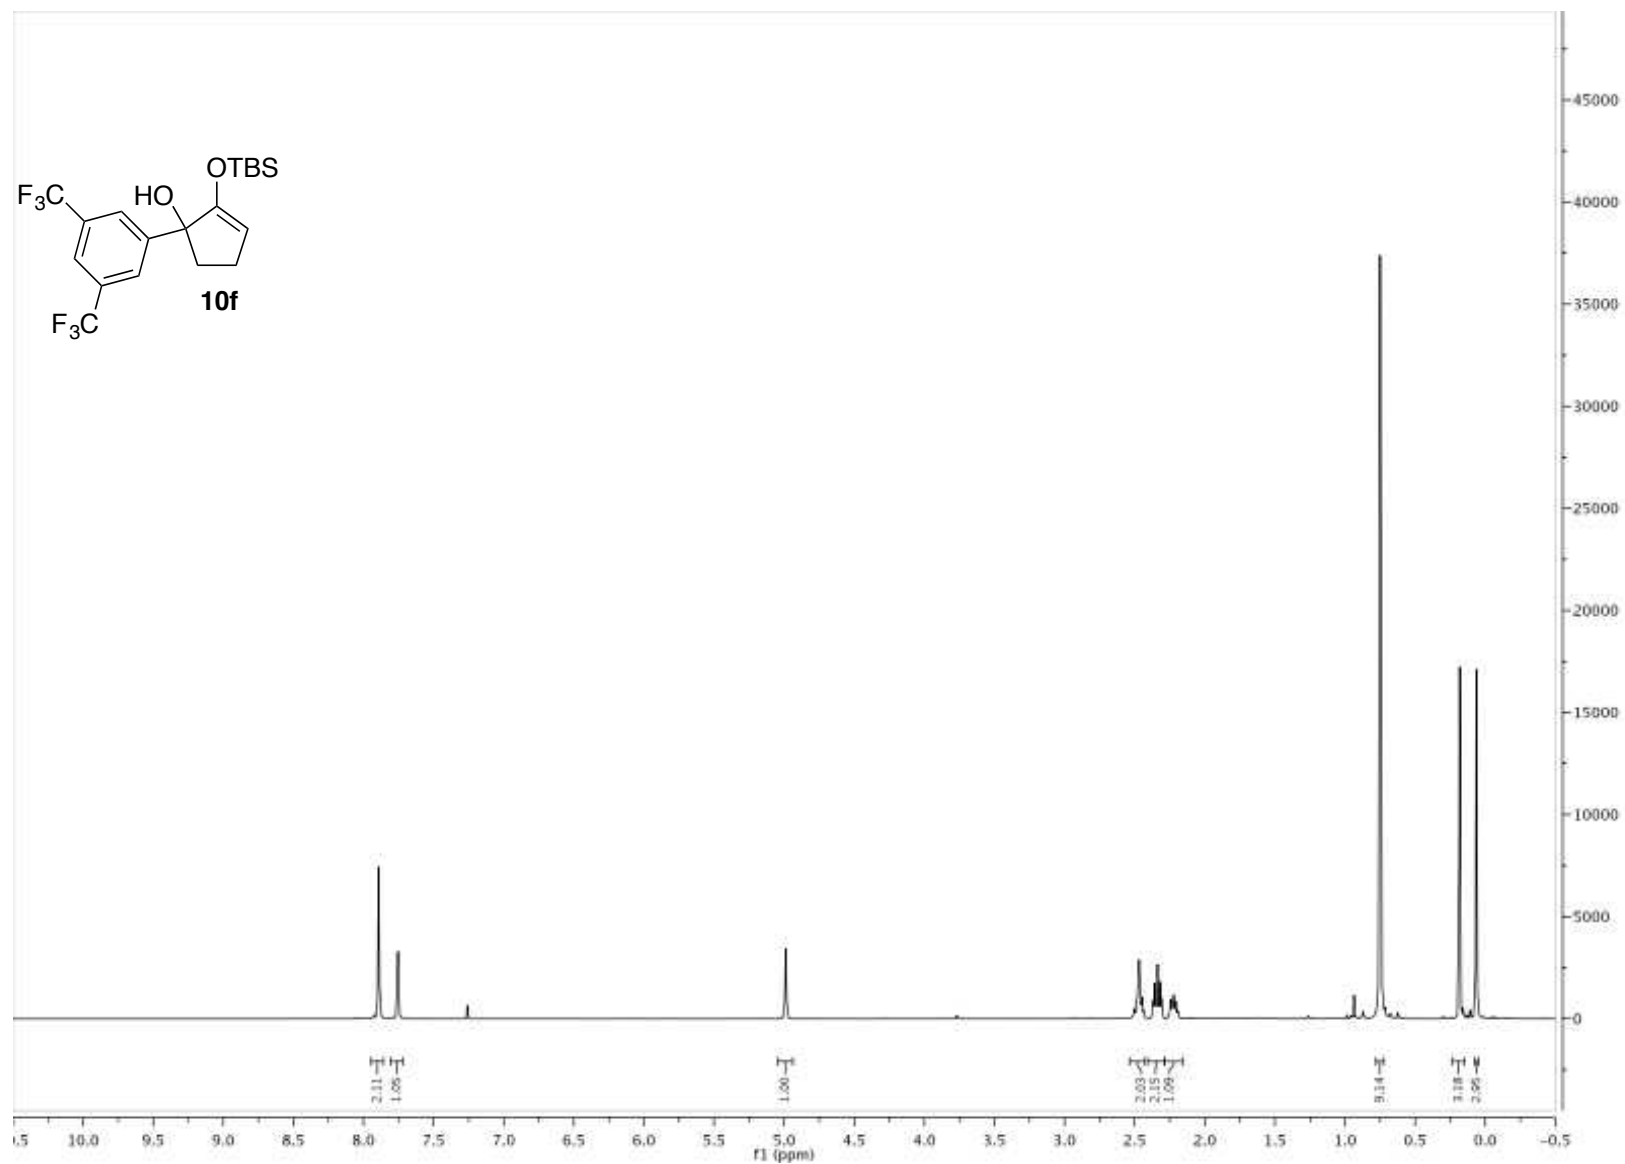





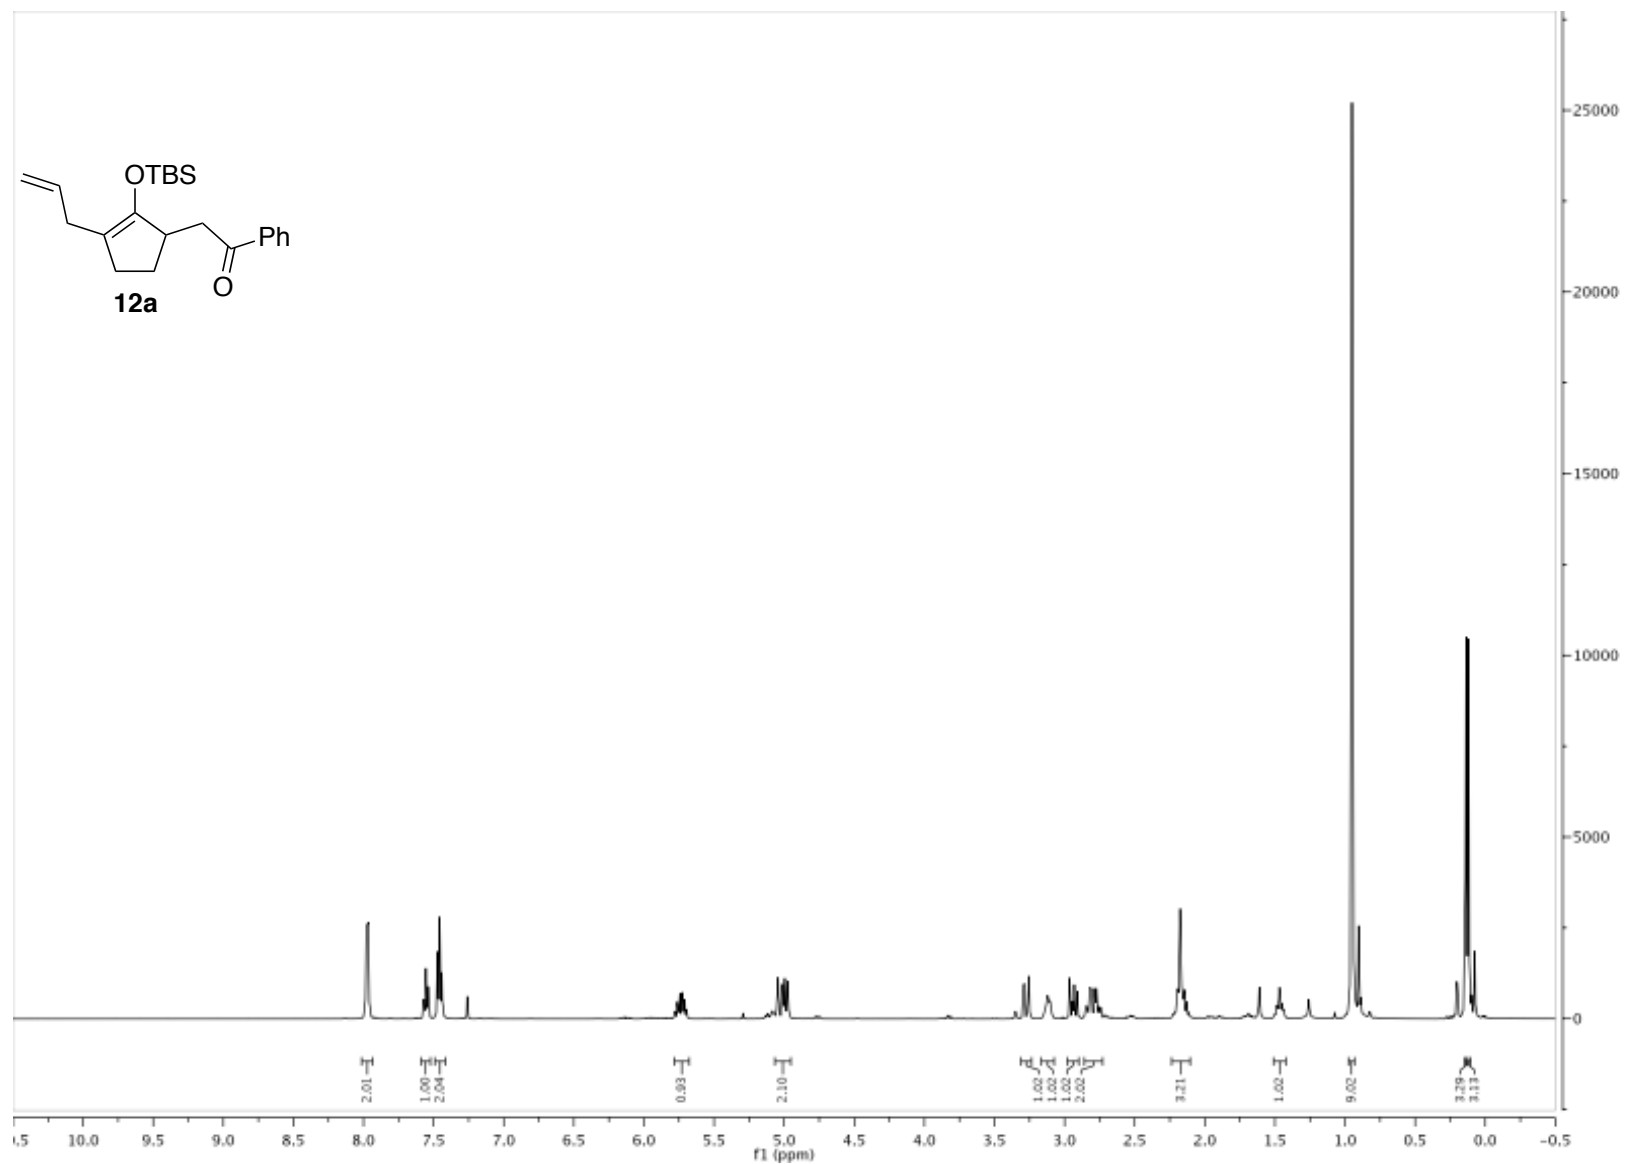

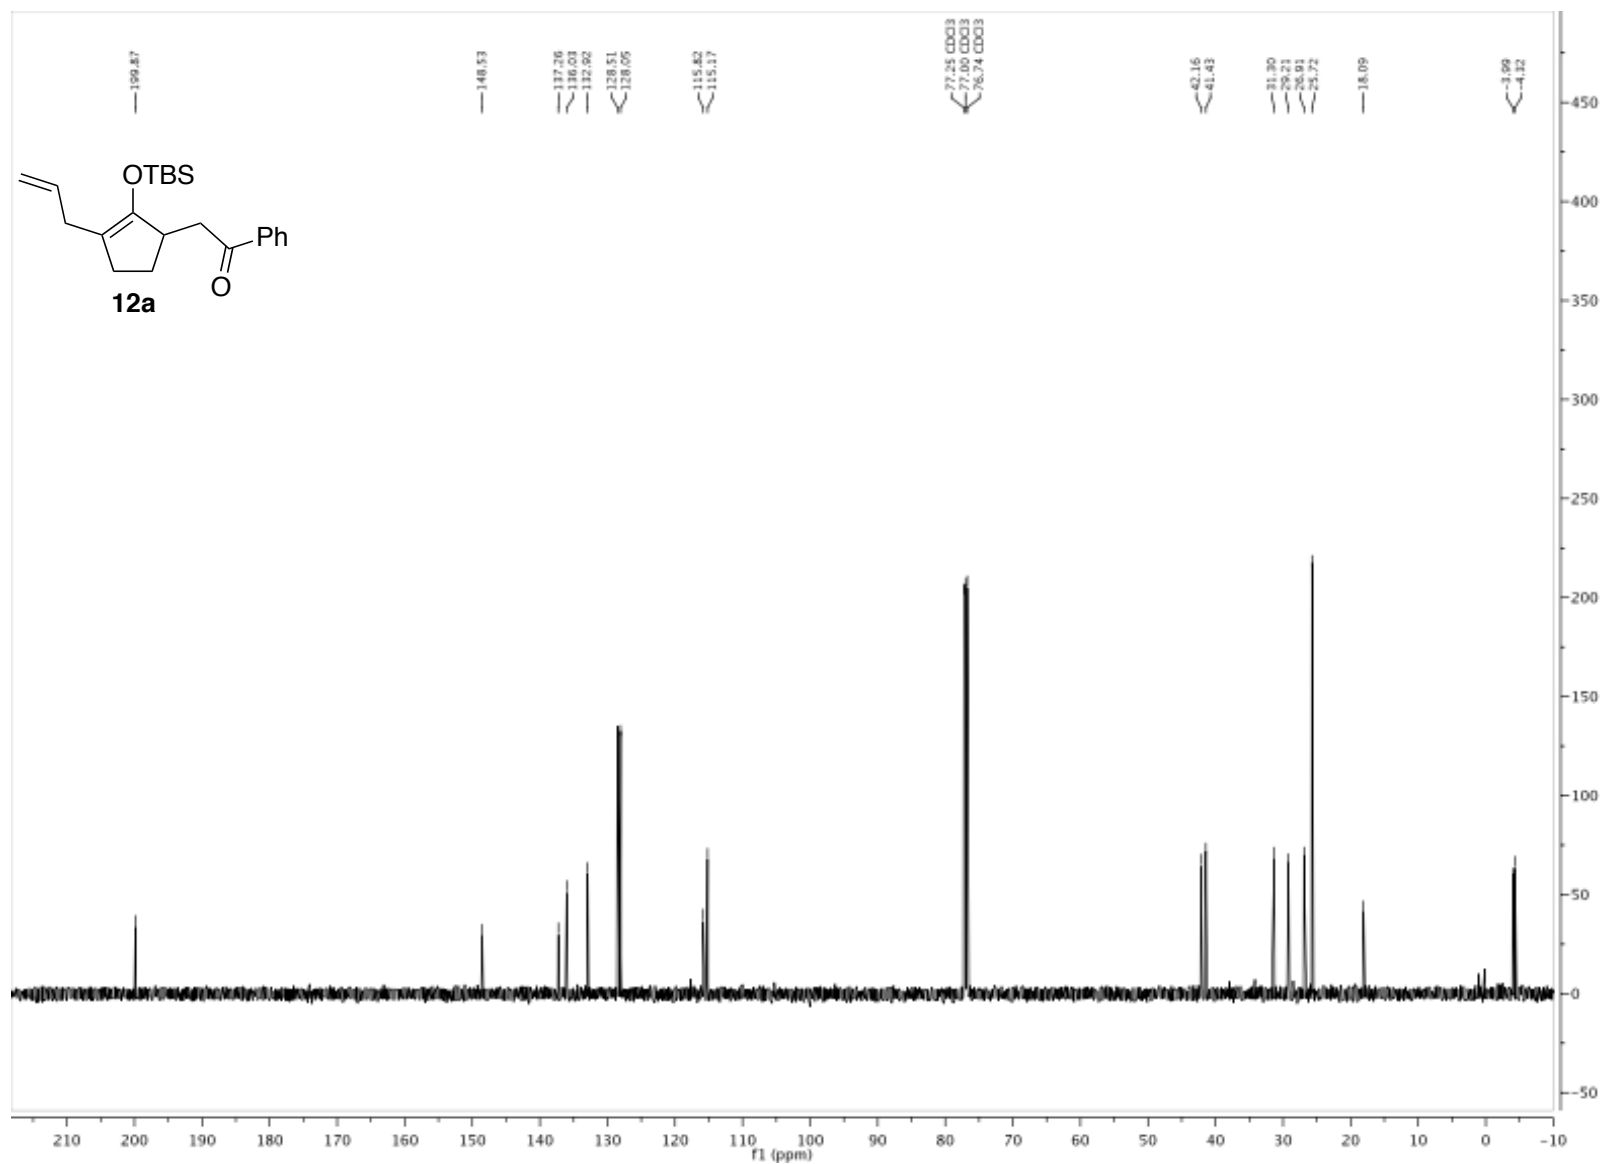

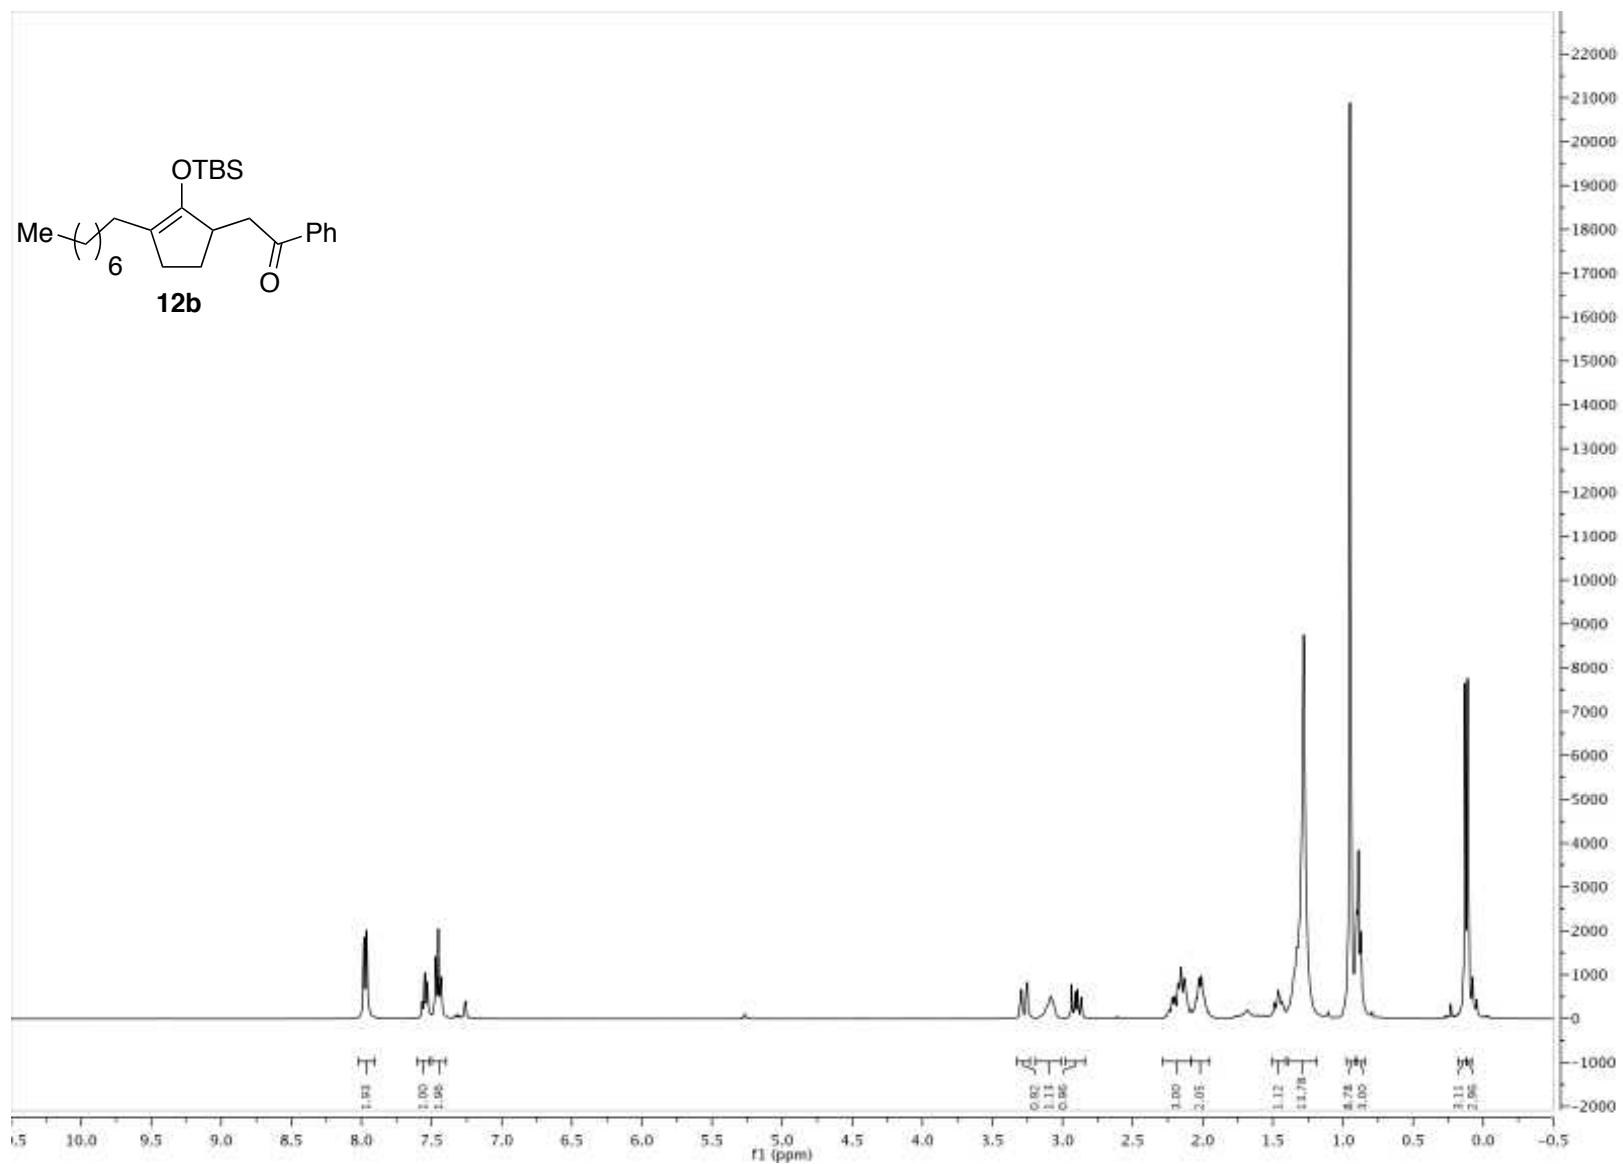



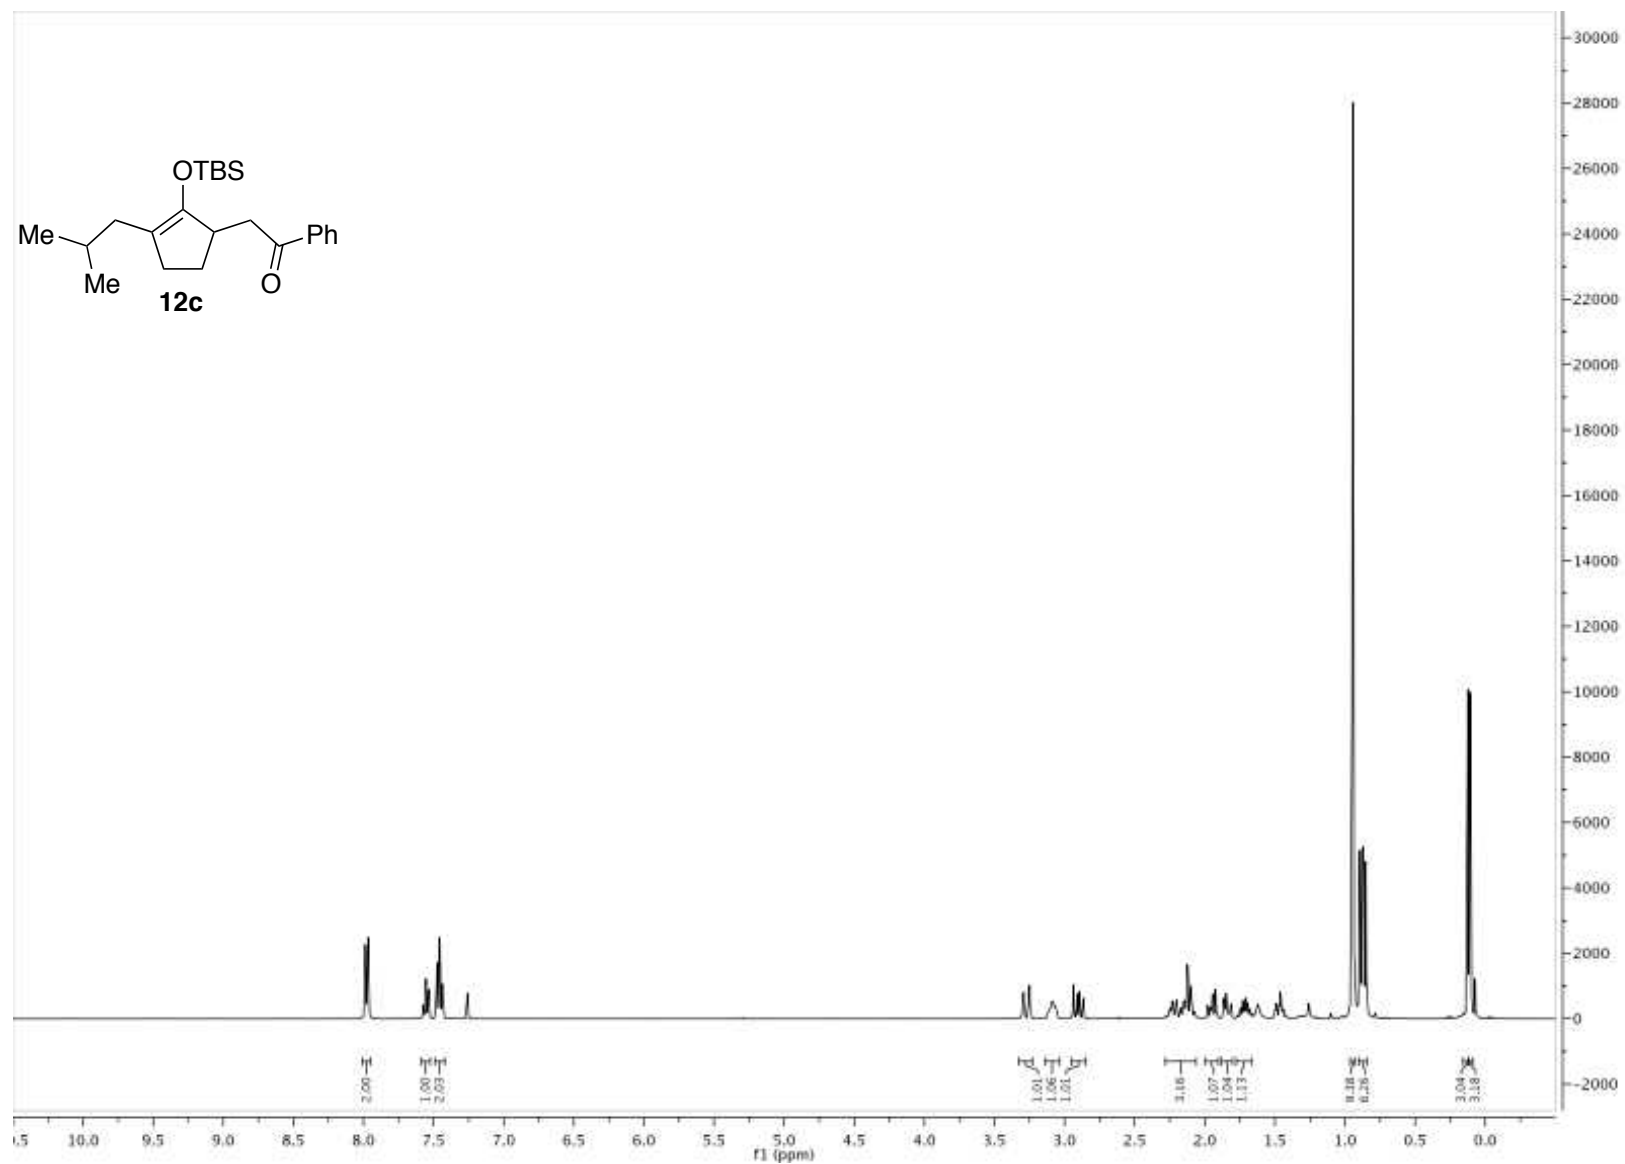

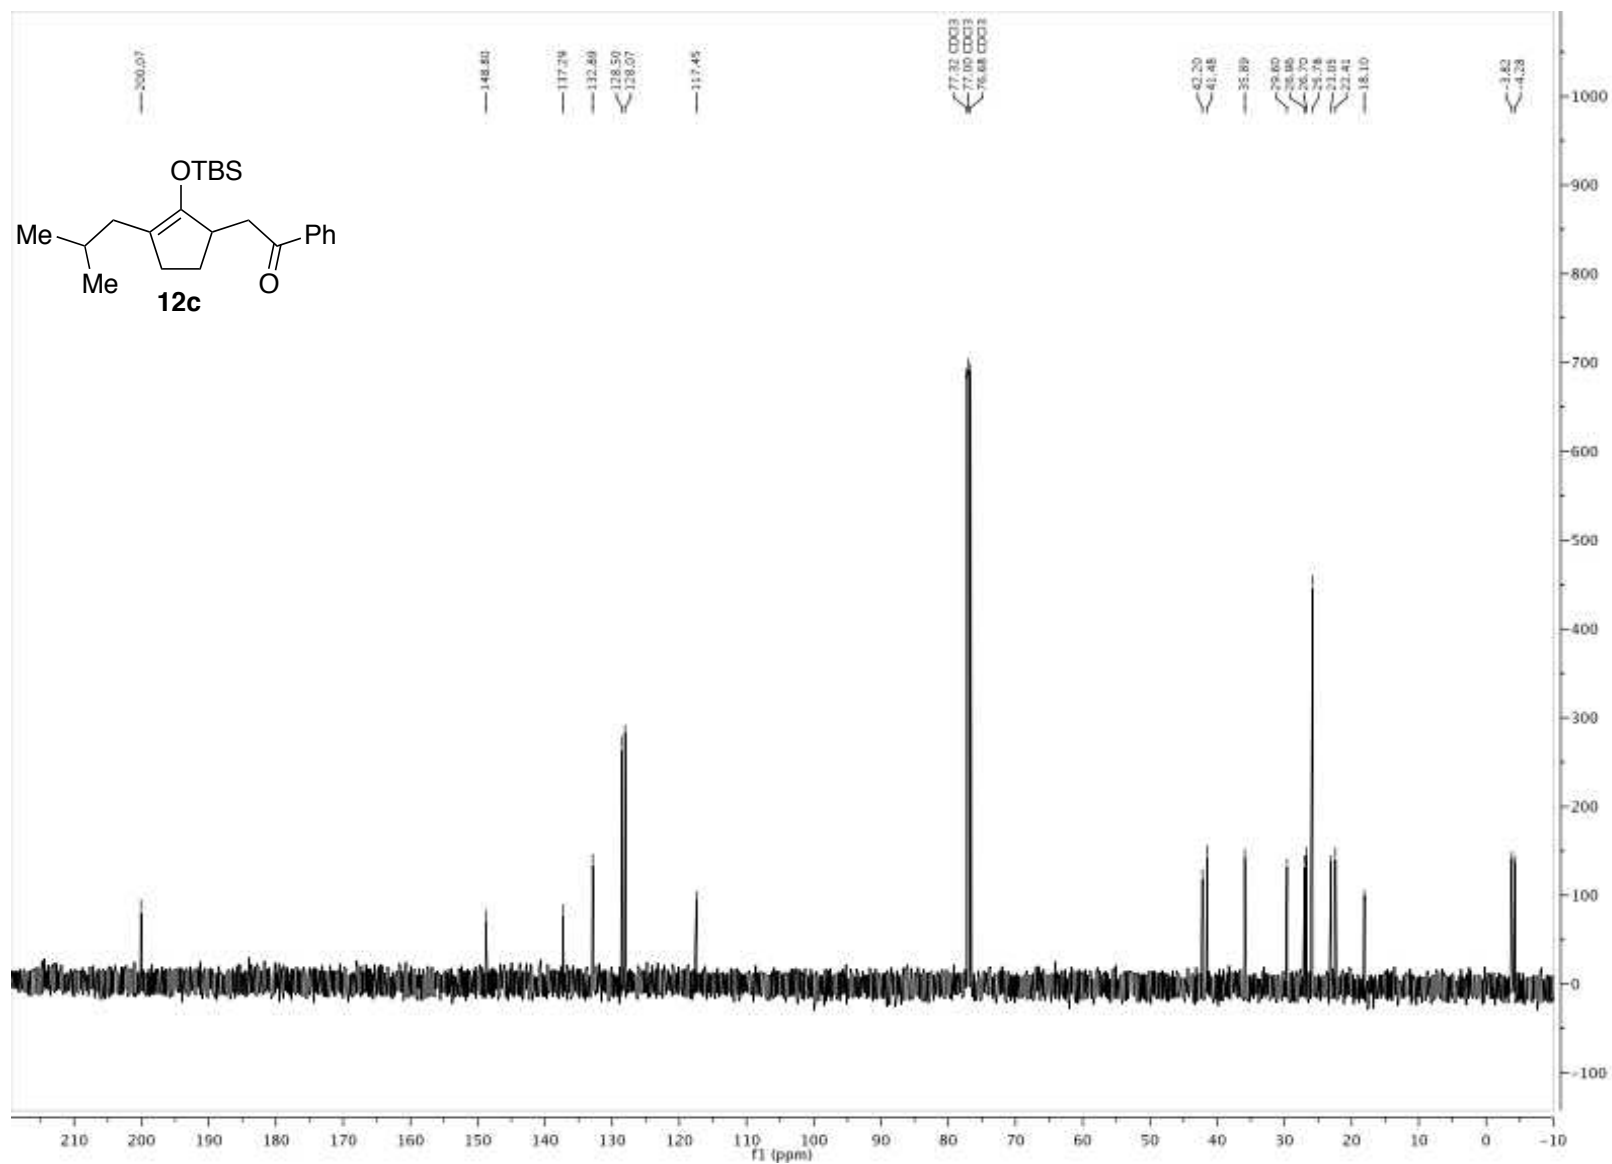

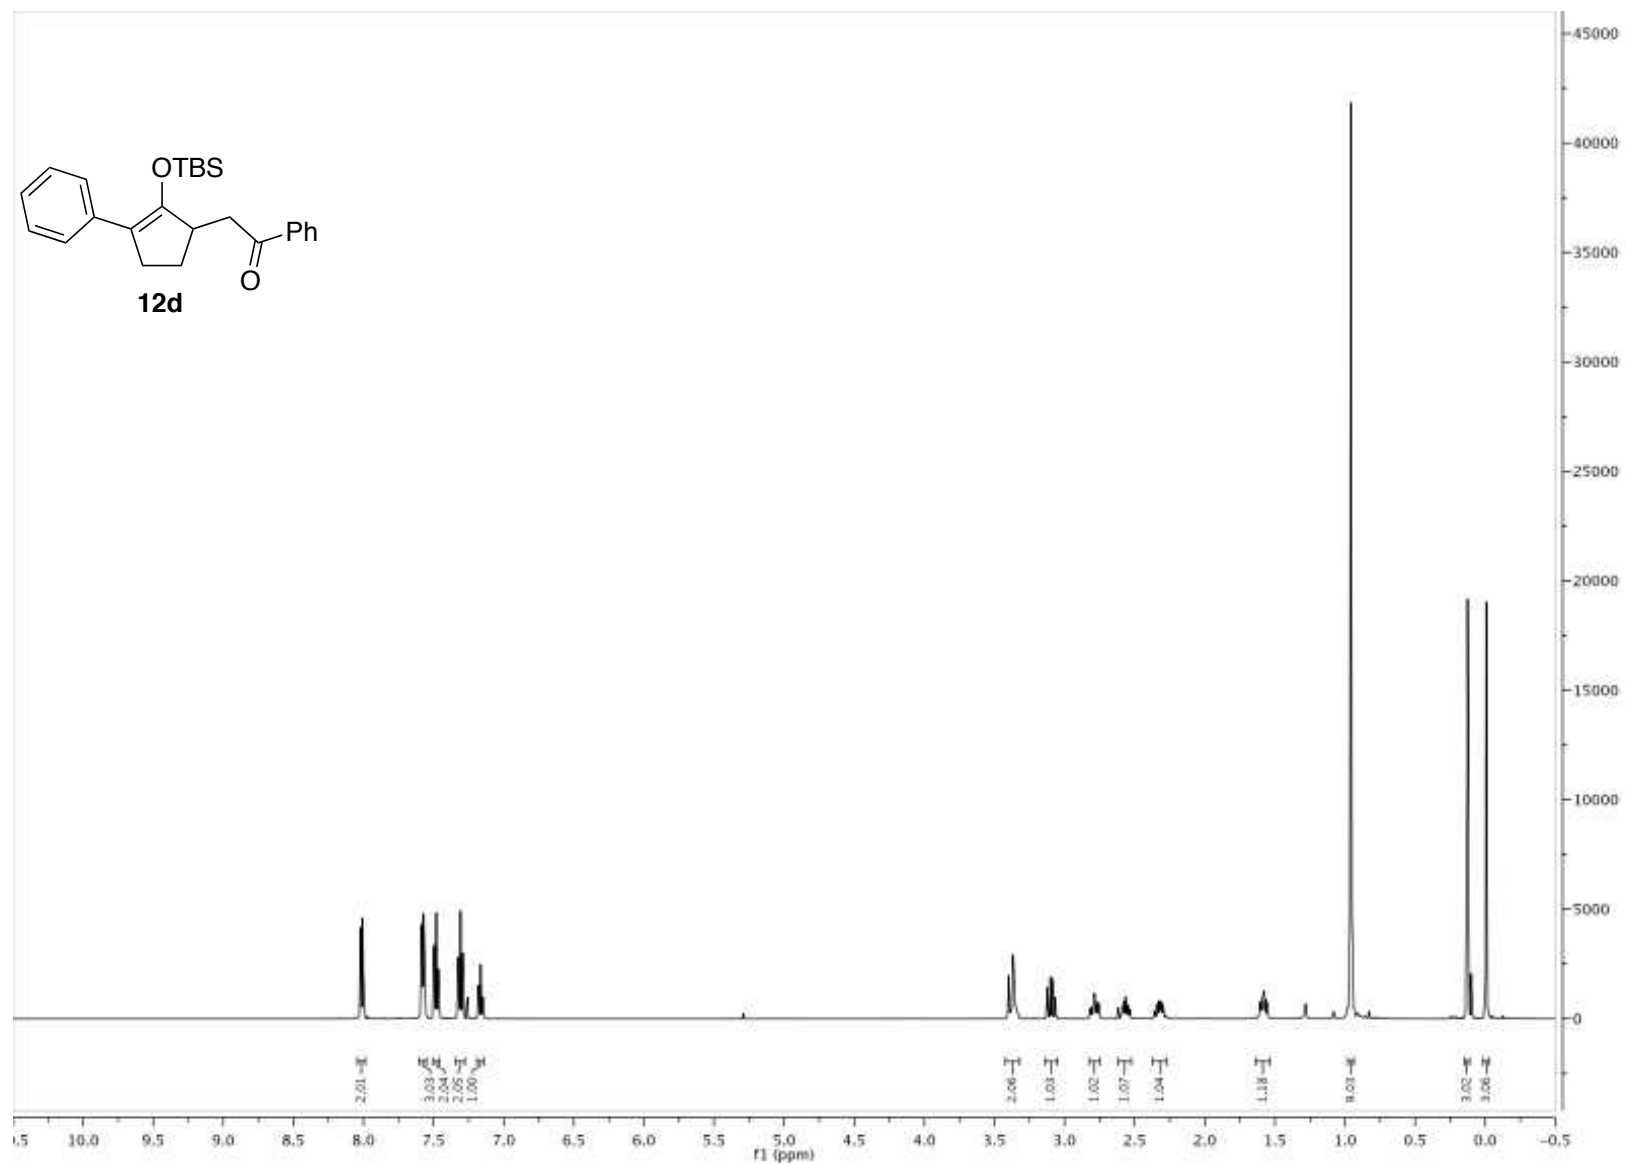

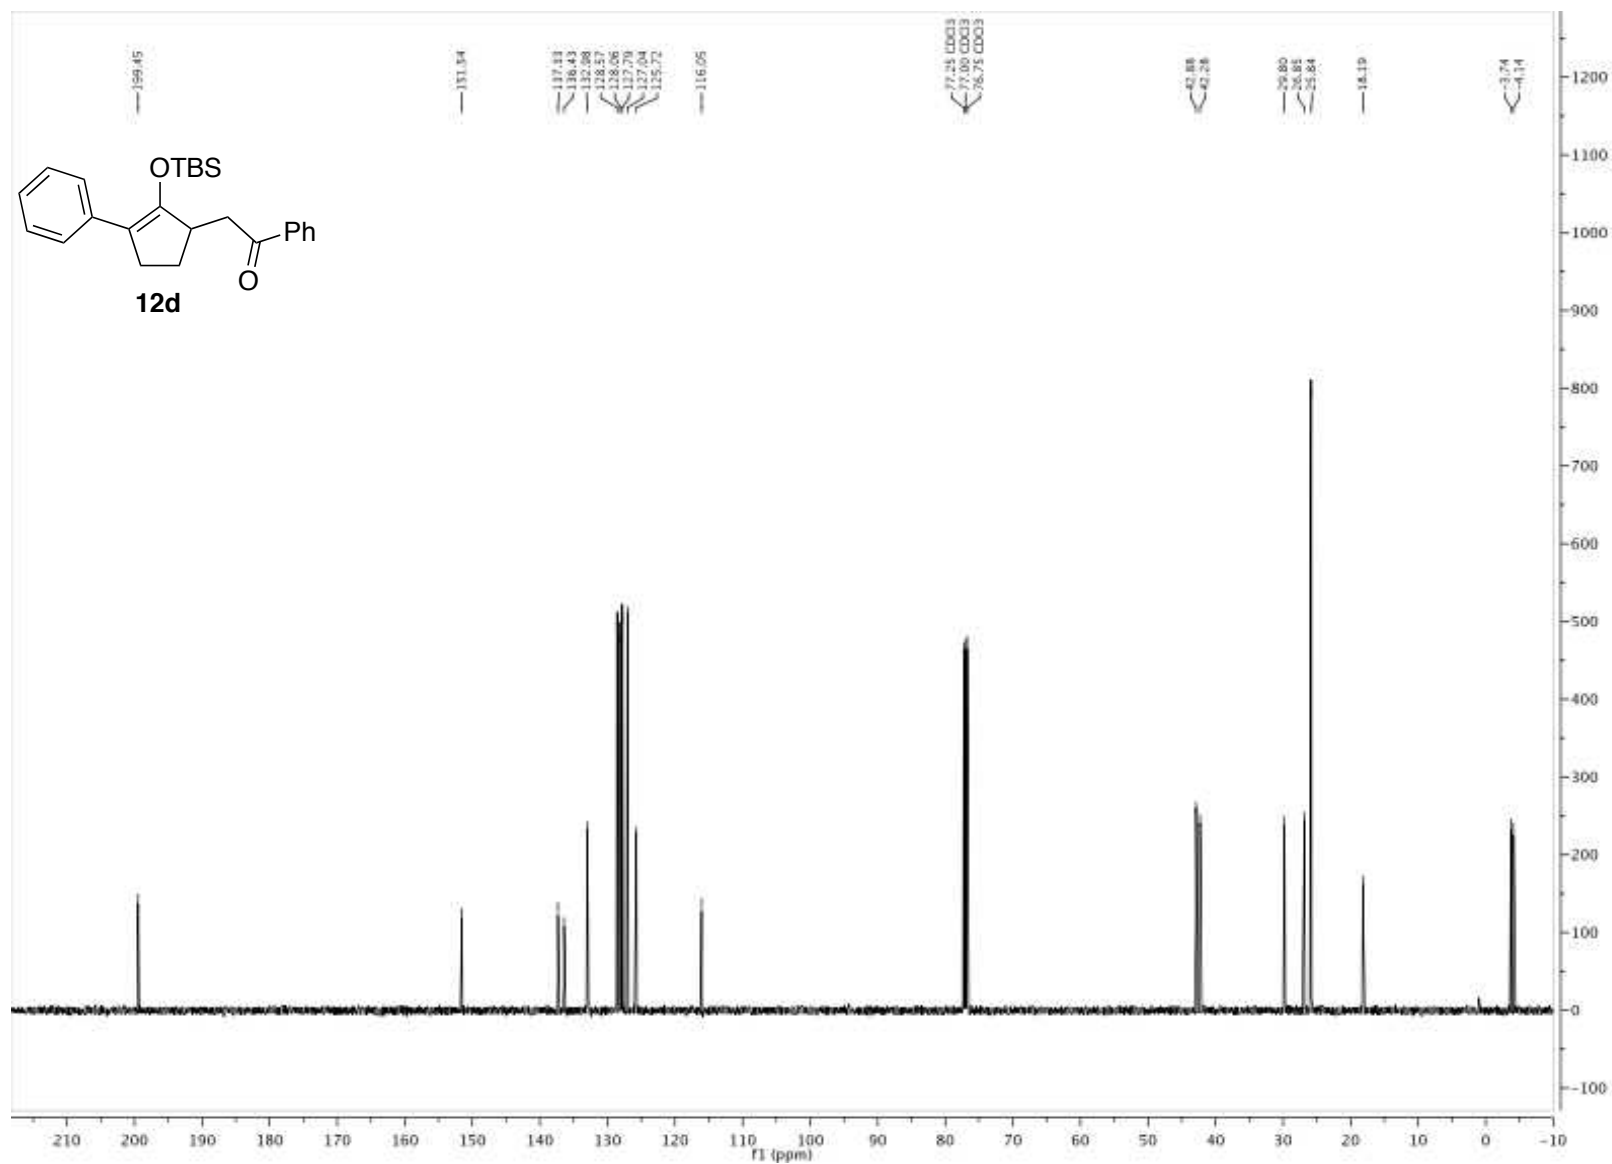







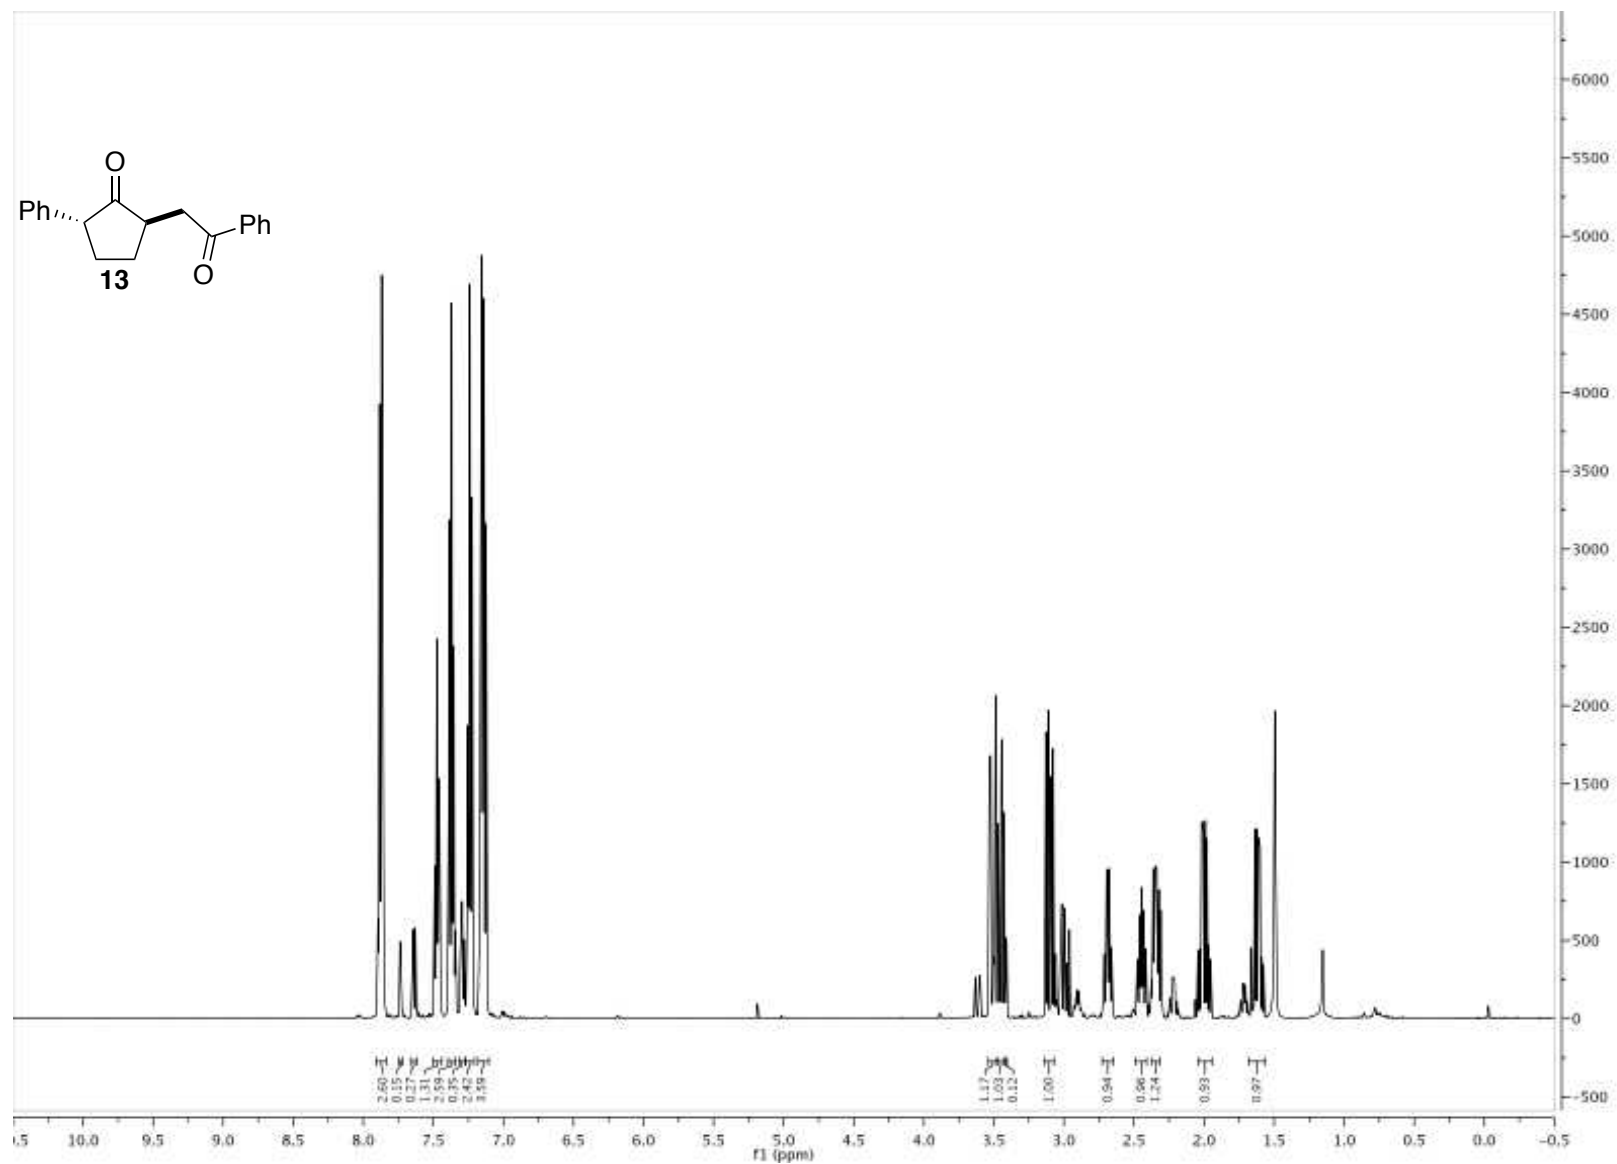

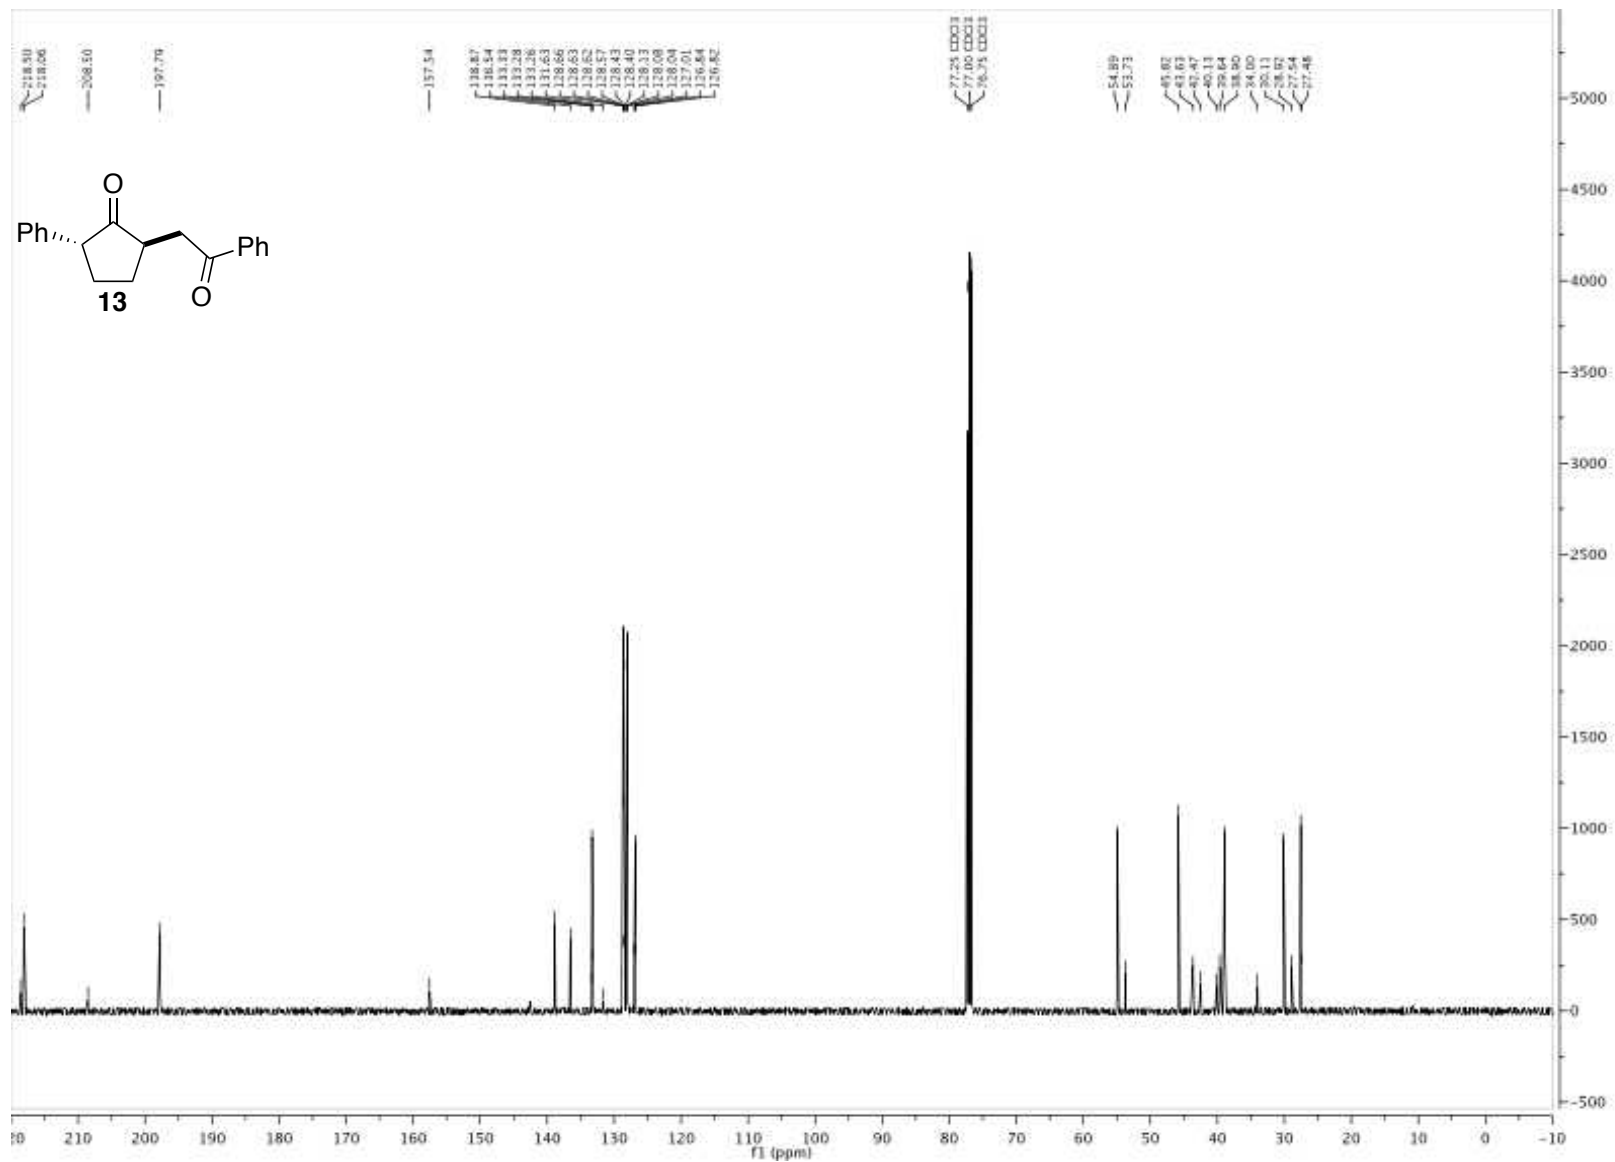

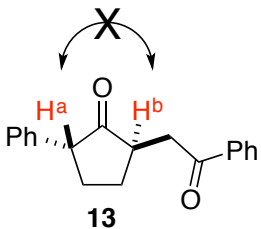

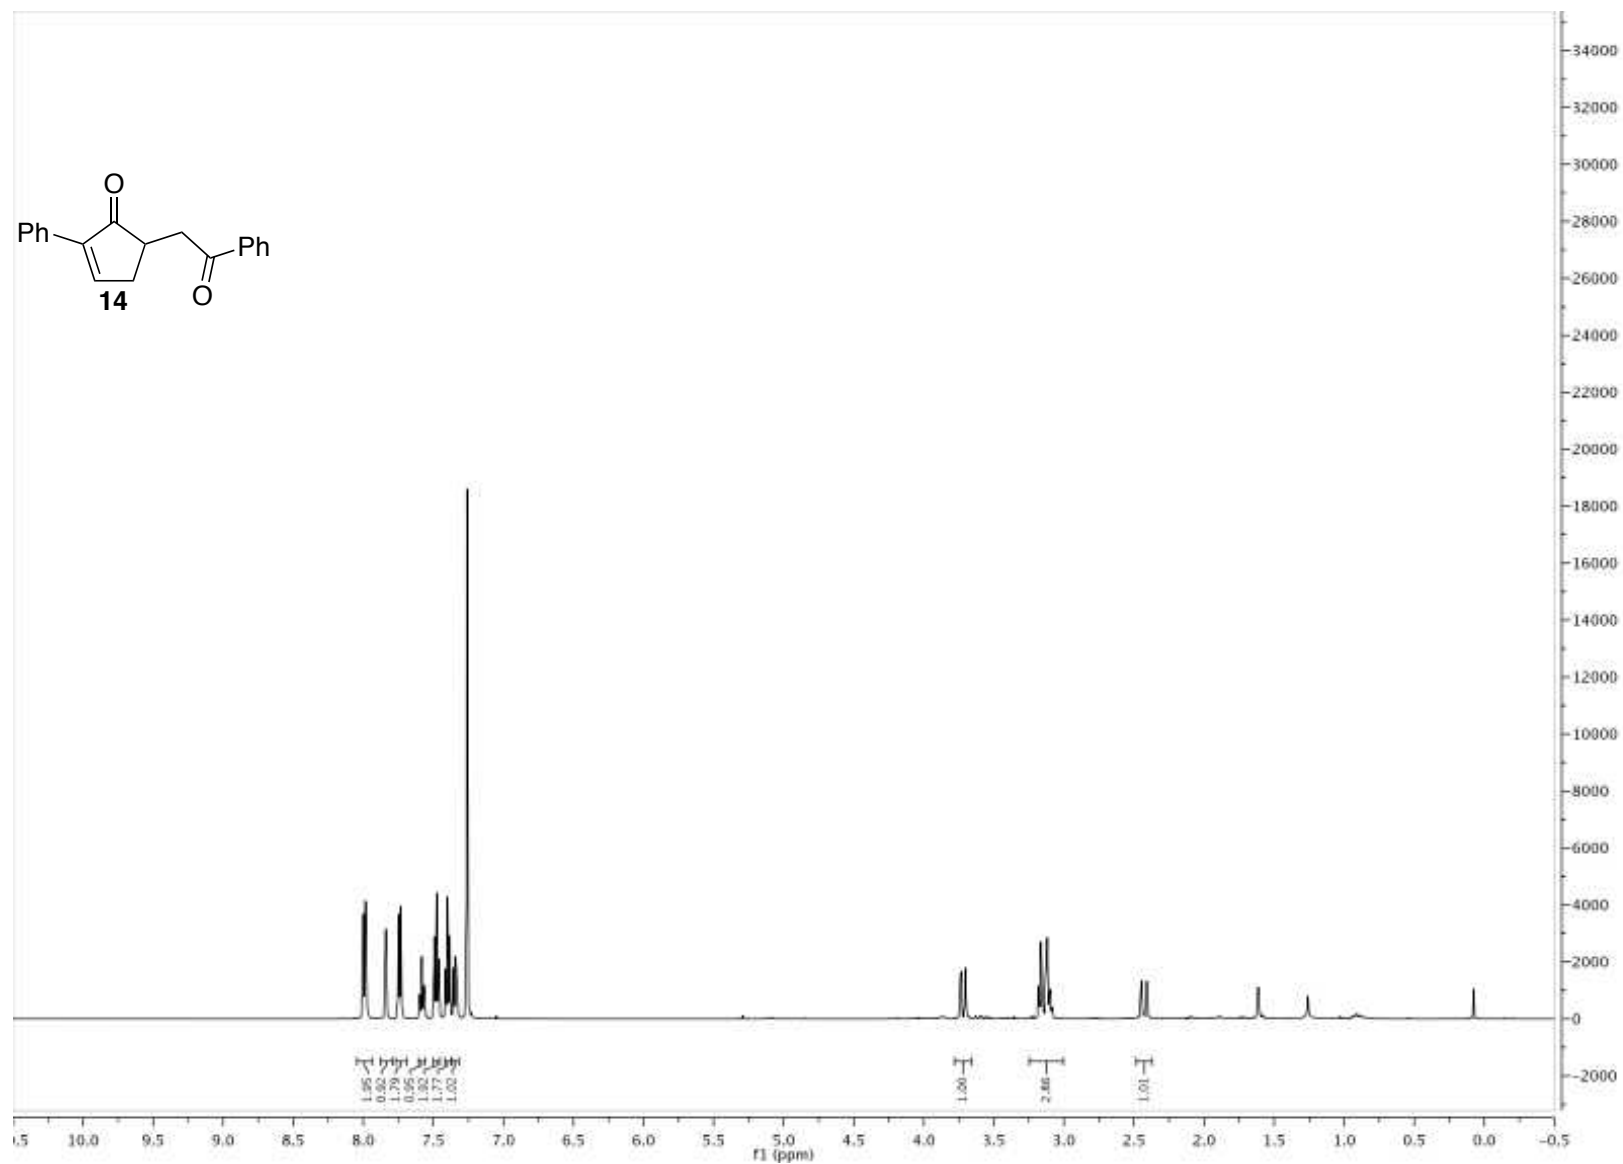

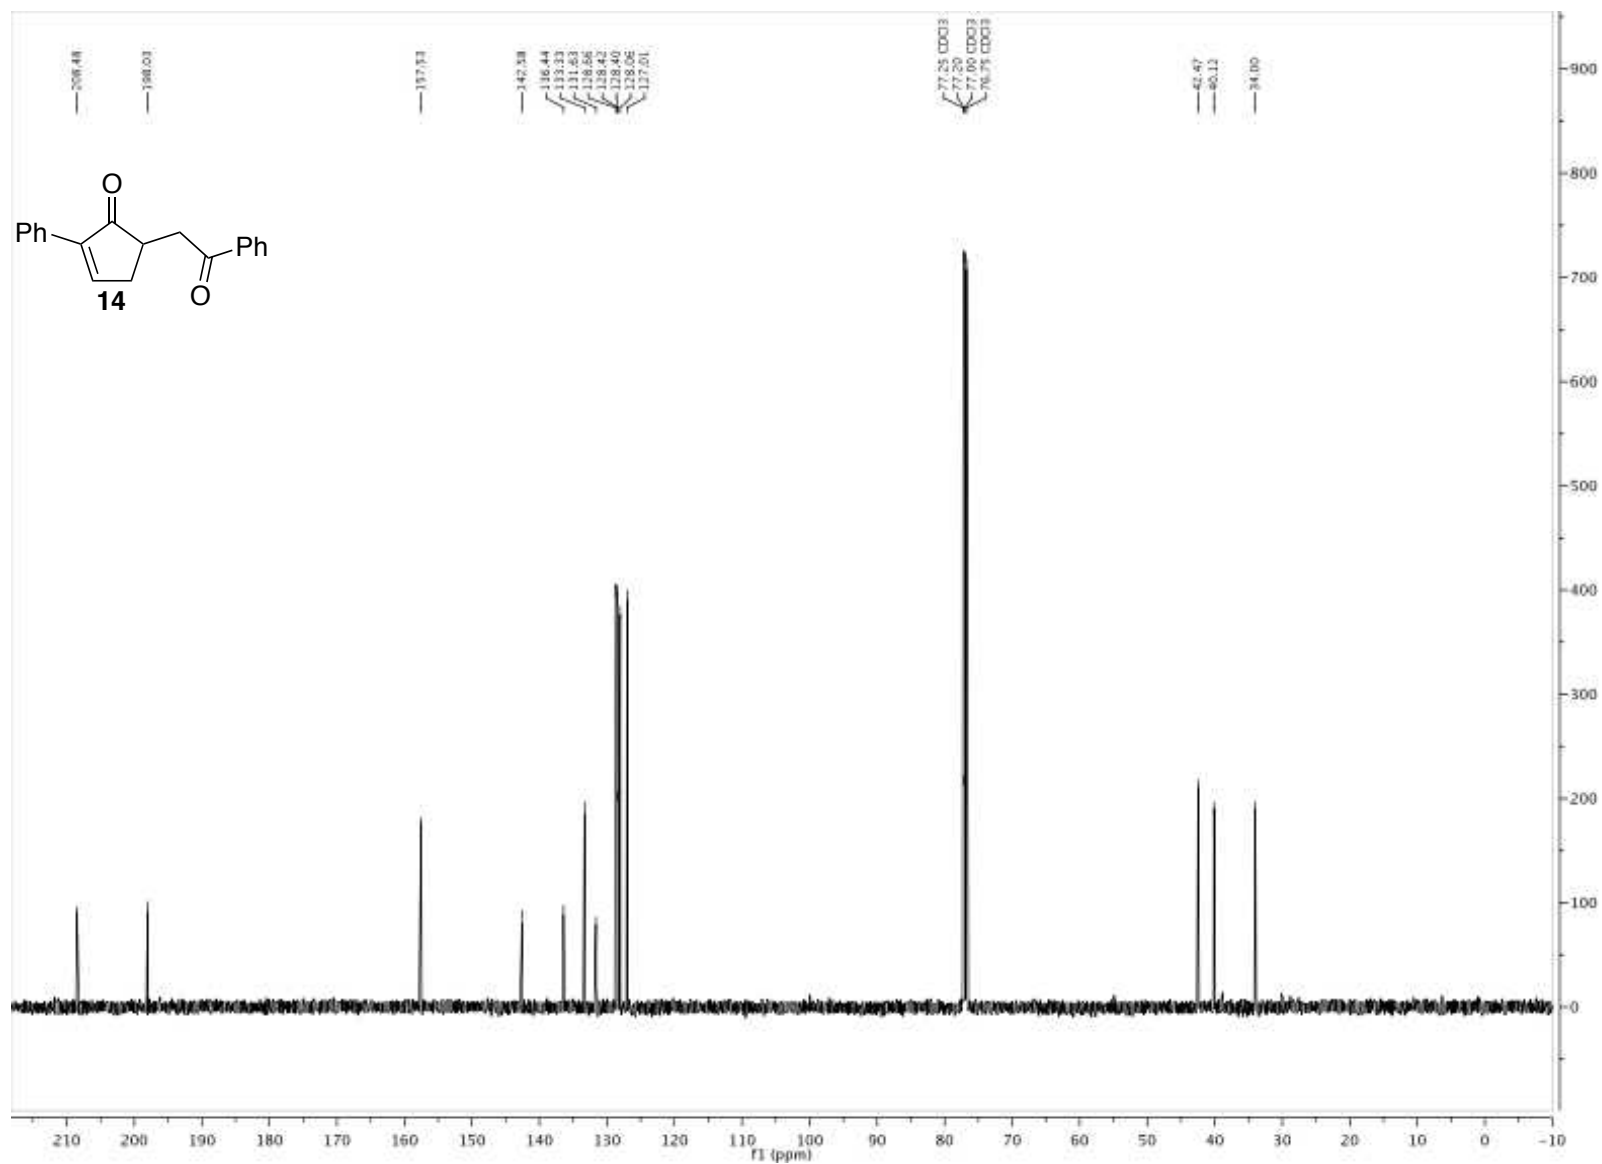

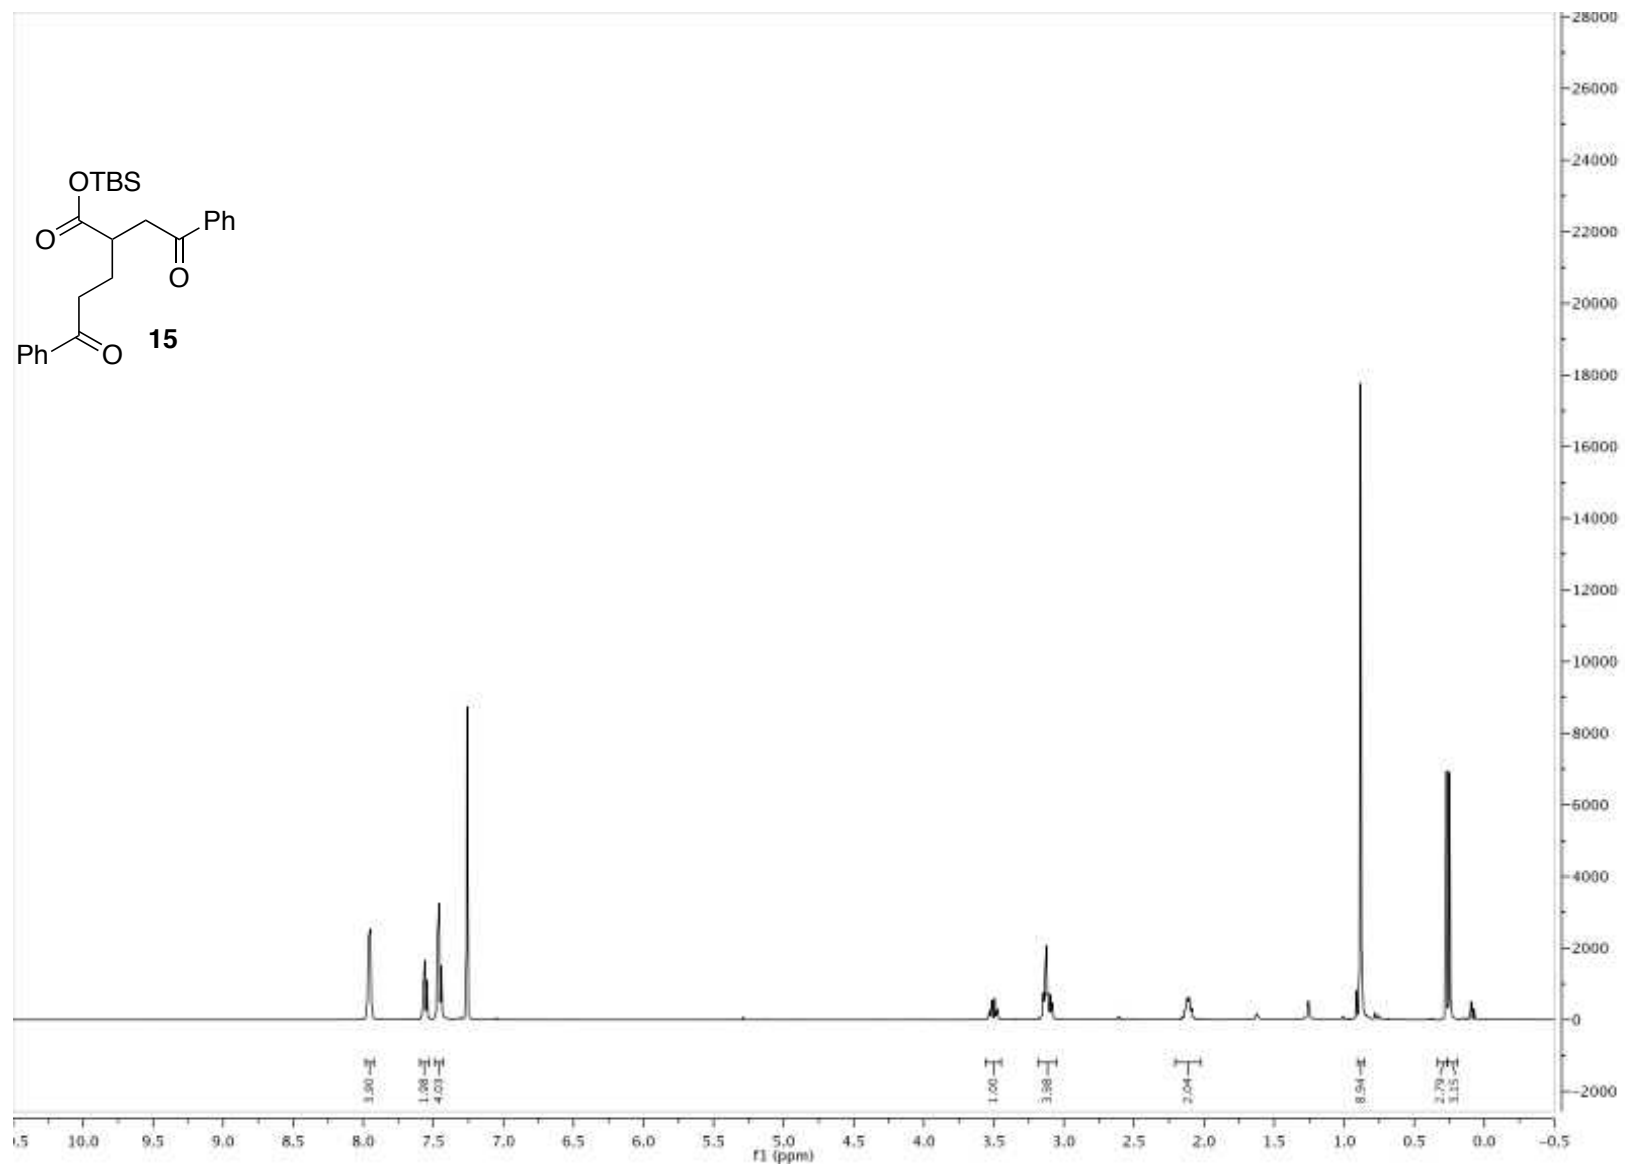



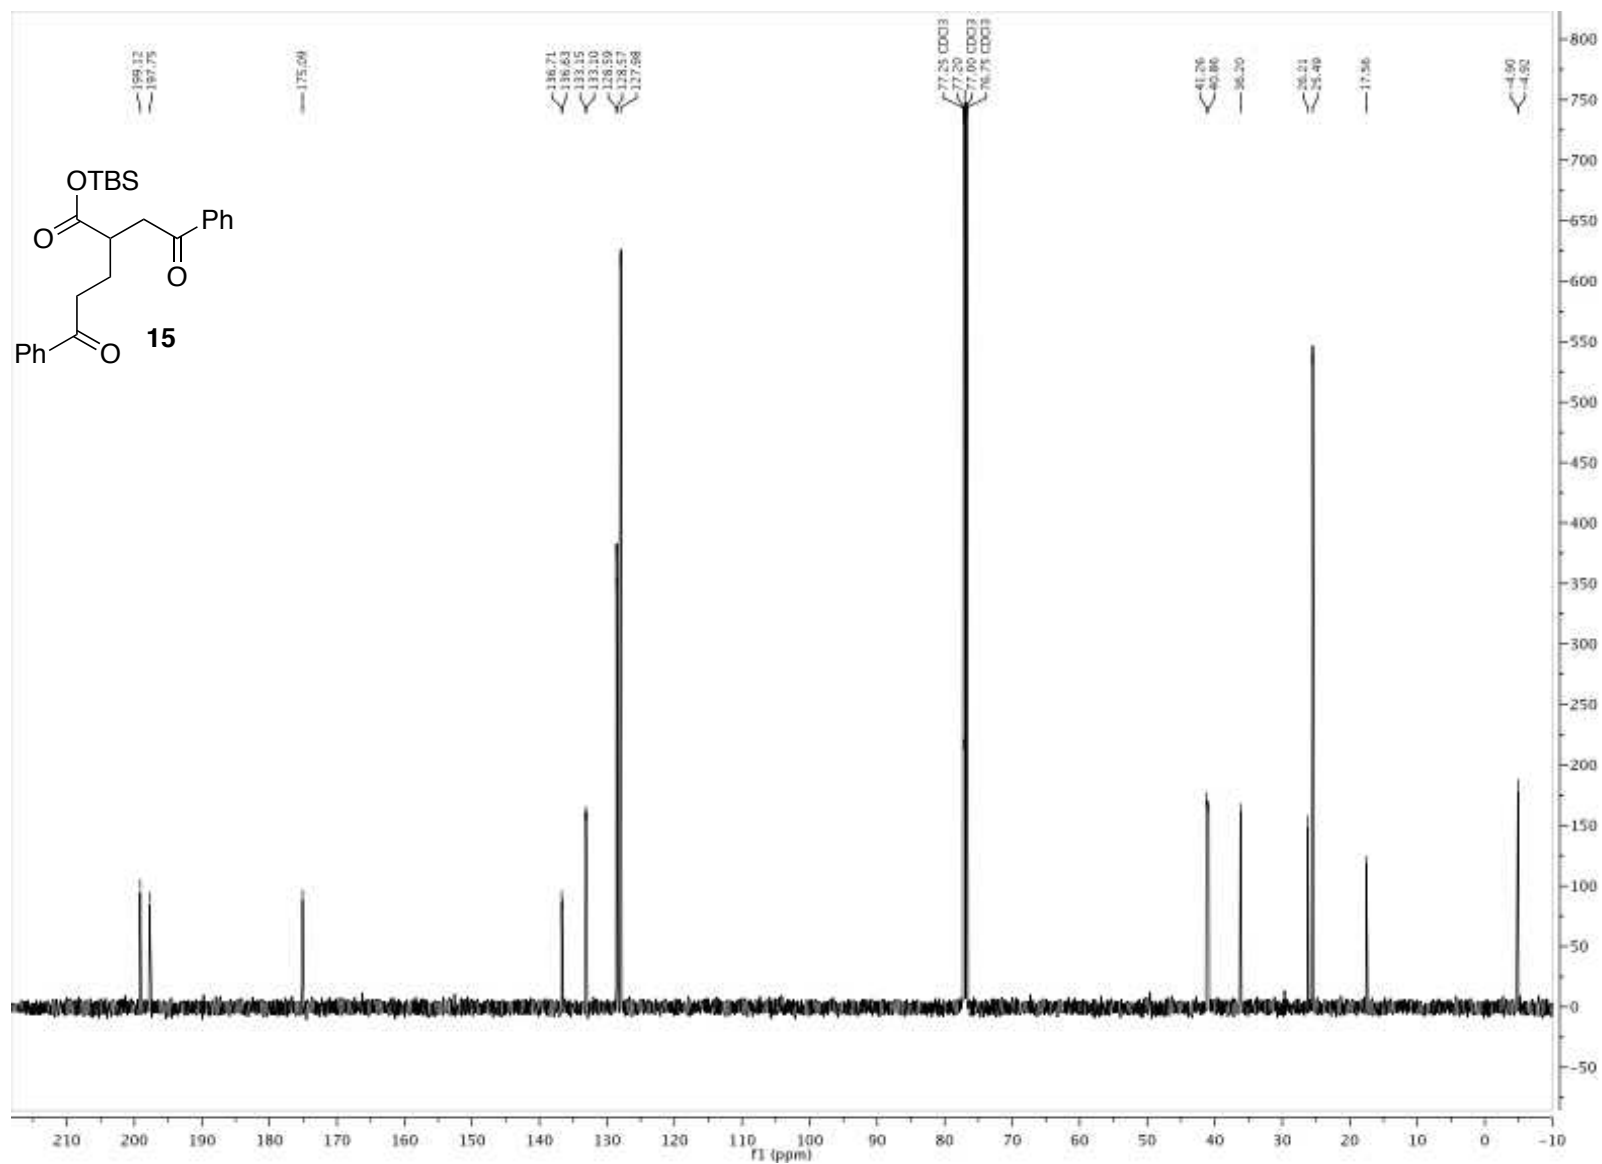



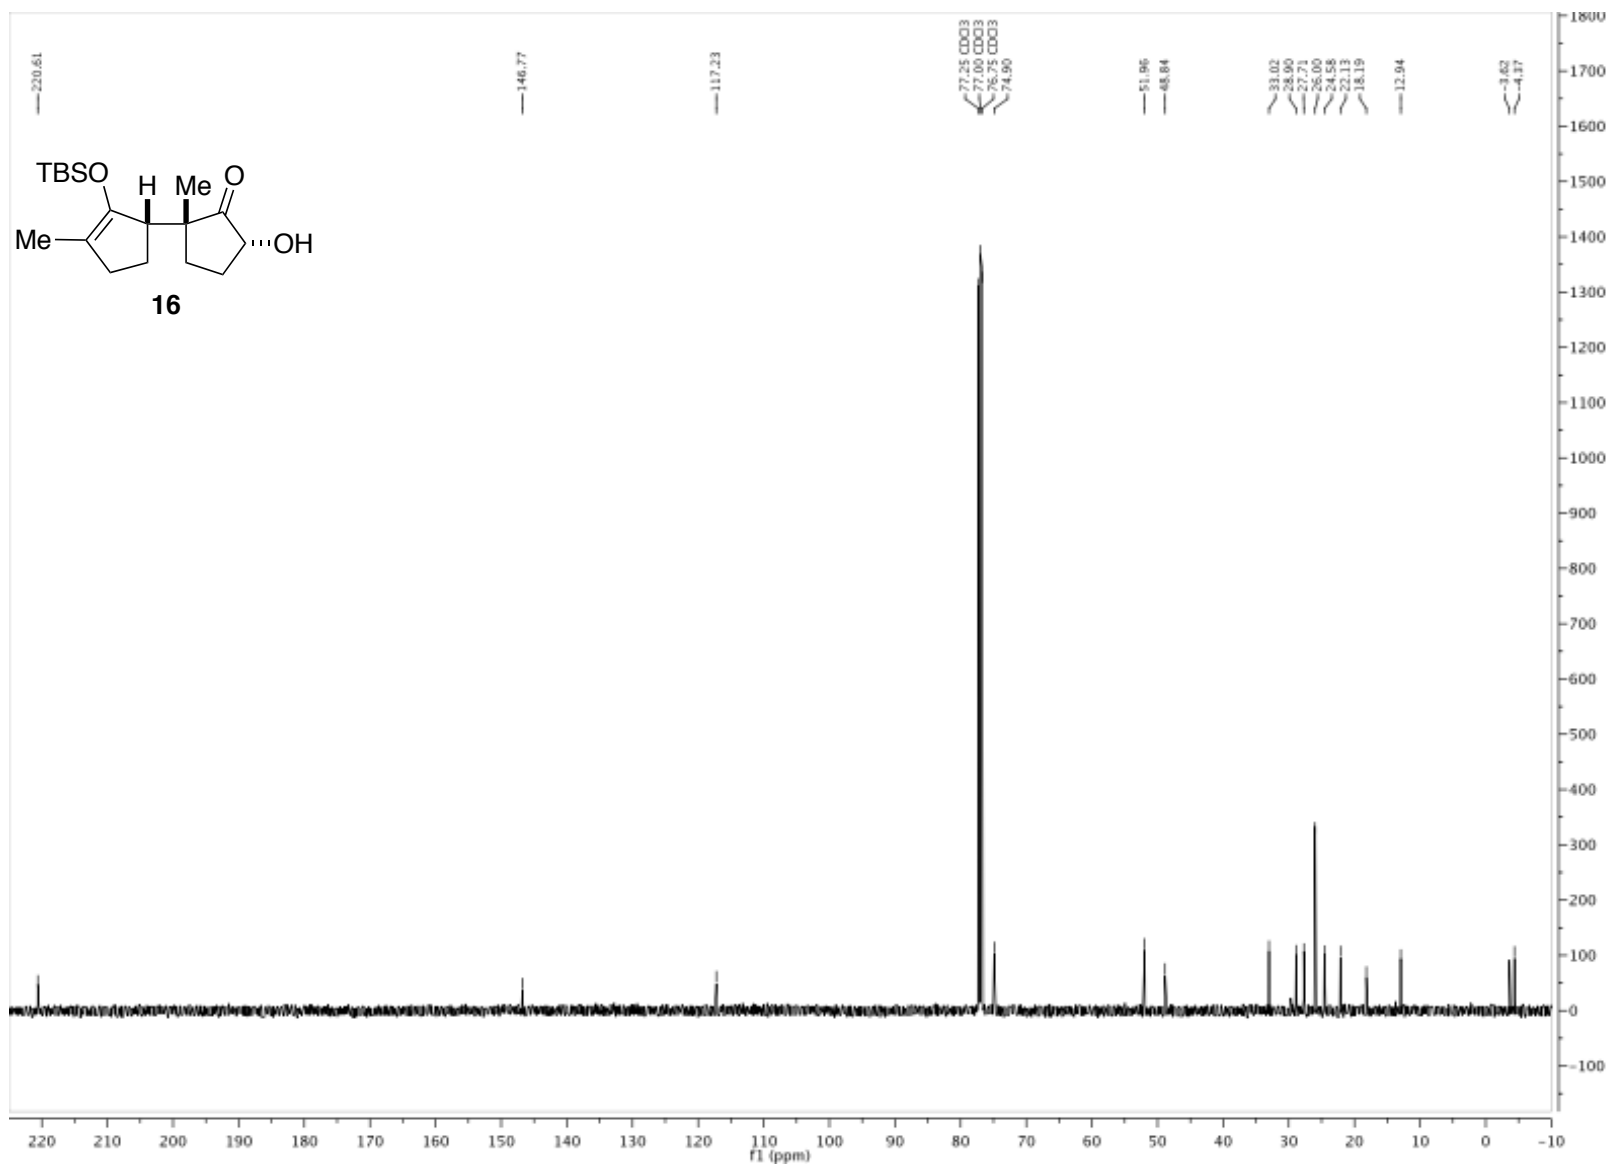

Supplement: c5cc09763k1.pdf [file c5cc09763k1.pdf]
